# Supplementary material for: A deep learning model for type II polyketide natural product prediction without sequence alignment
Source: Royal Society of Chemistry journal article supplement (doi:10.1039/d3dd00107e), 2023-01-01
Supplement: d3dd00107e2.pdf [file d3dd00107e2.pdf]

|                     |    |                |                |                                         |
|---------------------|----|----------------|----------------|-----------------------------------------|
| Naphthocyclinone    | 10 | AAD20267.1     | AAD20268.1     | DOI:10.1016/S0378-1119(98)00618-0       |
| Nenestatin-Pr       | 10 | ARD70901.1     | ARD70902.1     | MIBiG-BGC0001693                        |
| Nivetetracyclate-Pr | 10 | AGZ78377.1     | AGZ78375.1     | DOI: 10.1021/ol4027733                  |
| Nocardiosistin-iPr  | 10 | QOP59270.1     | QOP59271.1     | DOI: 10.1016/j.synbio.2018.10.008       |
| Nogalamycin         | 10 | CAA12017.1     | CAA12018.1     | DOI: 10.1007/s004380050562              |
| Oviedomycin         | 10 | CAG14965.1     | CAG14966.1     | MIBiG-BGC0000253                        |
| Metamycin-iPr       | 9  | VEJ30651.1     | VEJ30650.1     | DOI: 10.1126/science.aax9176            |
| Piloquinone-Leu     | 9  | QFS19044.1     | QFS19045.1     | DOI: 10.1021/acscchembio.0c00581        |
| Oxytetracycline     | 12 | AAZ78325.1     | AAZ78326.1     | MIBiG-BGC0000254                        |
| Paramagnetoquinone  | 10 | ASA49564.1     | ASA49565.1     | MIBiG-BGC0001730                        |
| PD116740            | 10 | AAO65362.1     | AAO65363.1     | DOI:10.1128/jb.179.2.470-476.1997       |
| Persiamycin         | 10 | WP_156000395.1 | WP_156000393.1 | DOI:10.3389/fmicb.2020.01237            |
| Polyketomycin       | 9  | ACN64834.1     | ACN64835.1     | MIBiG-BGC0001061                        |
| Pradimicin          | 8  | ABM21747.1     | ABM21748.1     | MIBiG-BGC0000256                        |
| Pyxidicycline       | 8  | AXM42927.1     | AXM42928.1     | MIBiG-BGC0001940                        |
| Qimimycin           | 10 | WP_058047374.1 | WP_058047373.1 | DOI: 10.1021/acs.jnatprod.6b00478       |
| R1128-Leu           | 10 | AAG30189.1     | AAG30188.1     | MIBiG-BGC0000261                        |
| Ravidomycin-Pr      | 10 | CBH32809.1     | CBH32808.1     | MIBiG-BGC0000263                        |
| Resistomycin        | 9  | CAE51174.1     | CAE51175.1     | MIBiG-BGC0000264                        |
| Rhodomycin-Pr       | 9  | WP_189725834.1 | WP_189725835.1 | DOI:10.1016/j.jmb.2009.09.003           |
| Rishirilide'-Leu    | 8  | AWM72904.1     | AWM72903.1     | DOI:10.1021/acs.jnatprod.8b00077        |
| Rishirilide-Leu     | 13 | AHL46710.1     | AHL46709.1     | MIBiG-BGC0001179                        |
| Rubrolone-Bu        | 13 | AOZ61212.1     | AOZ61213.1     | MIBiG-BGC0001762                        |
| Rubromycin'         | 10 | WP_073806072.1 | WP_073806071.1 | DOI:10.1002/bit.27732                   |
| Rubromycin          | 10 | AAG03067.1     | AAG03068.1     | MIBiG-BGC0000266                        |
| Sapromycin          | 10 | BAV16999.1     | BAV17000.1     | MIBiG-BGC0001384                        |
| SaquayamycinA       | 12 | ARO44655.1     | ARO44656.1     | MIBiG-BGC0001769                        |
| SaquayamycinZ       | 10 | ACP19353.1     | ACP19354.1     | MIBiG-BGC0000267                        |
| Sch                 | 9  | AAA02833.1     | AAA02834.1     | DOI:10.1016/0378-1119(93)90352-4.       |
| Sch47554            | 10 | CAH10117.1     | CAH10116.1     | MIBiG-BGC0000268                        |
| Setomimycin         | 10 | WP_037658548.1 | WP_037658550.1 | MIBiG-BGC0002000                        |
| SF2575              | 10 | ADE34518.1     | ADE34519.1     | MIBiG-BGC0000269                        |
| Simocyclinone       | 10 | AAK06784.1     | AAK06785.1     | MIBiG-BGC0001072                        |
| Simocyclinone'      | 10 | WP_052390556.1 | WP_030269265.1 | DOI:10.1021/acscchembio.5b00669         |
| Steffimycin         | 10 | CAJ42320.1     | CAJ42319.1     | MIBiG-BGC0000273                        |
| Streptoketide-Pr    | 10 | QED90637.1     | QED90612.1     | DOI:10.1021/acs.joc.9b02741             |
| Tetarimycin         | 10 | AFY23044.1     | AFY23043.1     | MIBiG-BGC0000274                        |
| Tetracenomycin      | 13 | AAA67515.1     | AAA67516.1     | MIBiG-BGC0000275                        |
| Thioangucycline     | 10 | WP_073867016.1 | WP_073867015.1 | DOI: 10.1002/anie.202015570             |
| TLN-05220-Ile       | 13 | ADB23391.1     | ADB23392.1     | MIBiG-BGC0001062                        |
| Trioxacarcin-Ile    | 10 | AKT74262.1     | AKT74261.1     | DOI:10.1039/C5SC00116A                  |
| Turbinicin          | 10 | WP_155333336.1 | WP_155333335.1 | DOI: 10.1126/science.abd6919            |
| Urdamycin           | 10 | CAA60569.1     | CAA60570.1     | DOI: 10.1128/jb.177.21.6126-6136.1995   |
| Warkmycin           | 12 | OWA25245.1     | OWA25244.1     | MIBiG-BGC0001438                        |
| Wexrubicin          | 13 | WP_025578803.1 | WP_025578805.1 | DOI: 10.1126/science.aax9176            |
| WhiE                | 10 | CAA39408.1     | CAA39409.1     | DOI:10.1111/j.1365-2958.1990.tb00545.x. |
| WS79089D            | 13 | WP_2890796.1   | WP_2890797.1   | DOI:10.1007/s00253-020-10765-y          |
| X26                 | 13 | AEM44309.1     | AEM44308.1     | DOI:10.1073/pnas.1103921108             |
| Xantholipin         | 13 | ADE22315.1     | ADE22314.1     | MIBiG-BGC0000279                        |
| ZHMpentangular      | 13 | WP_003993028.1 | WP_003993029.1 | DOI:10.1038/nchembio.2341               |
