# Supplementary material for: A deep learning model for type II polyketide natural product prediction without sequence alignment
Source: Royal Society of Chemistry journal article supplement (doi:10.1039/d3dd00107e), 2023-01-01
Supplement: d3dd00107e3.pdf [file d3dd00107e3.pdf]

**Table S2.** General information of predicted T2PKs and their  $\beta$ -ketosynthase pair  $KS_{\alpha}/KS_{\beta}$  protein references

| Name of bacteria strain                    | $KS_{\alpha}$ accession | $KS_{\beta}$ accession |
|--------------------------------------------|-------------------------|------------------------|
| Streptococcus intermedius B196             | WP_000883312.1          | WP_000213426.1         |
| Streptomyces sp. WM6391                    | WP_003973654.1          | WP_003973655.1         |
| Streptomyces sp. WM6391                    | WP_166680923.1          | WP_003973890.1         |
| Streptomyces viridochromogenes Tue57       | WP_003997817.1          | WP_003997816.1         |
| Streptomyces griseoflavus Tu4000           | WP_004922256.1          | WP_004922259.1         |
| Streptomyces mobaraensis                   | WP_004948216.1          | WP_004948214.1         |
| Streptomyces viridosporus T7A              | WP_004991632.1          | WP_004991631.1         |
| Amycolatopsis azurea                       | WP_005158456.1          | WP_005158459.1         |
| Streptomyces pristinaespiralis strain=PR11 | WP_005321657.1          | WP_005321660.1         |
| Saccharomonospora azurea                   | WP_005438761.1          | WP_005438754.1         |
| Saccharomonospora azurea SZMC              | WP_005448206.1          | WP_005448204.1         |
| Saccharomonospora cyanea                   | WP_005456341.1          | WP_005456342.1         |
| Saccharomonospora glauca                   | WP_005464301.1          | WP_005464302.1         |
| Streptomyces sp. SID5476                   | WP_020665472.1          | WP_005483388.1         |
| Streptomyces rubiginosus                   | WP_006130548.1          | WP_006130547.1         |
| Streptomyces rubiginosus                   | WP_006134517.1          | WP_006134518.1         |
| Streptomyces griseoaurantiacus M045        | WP_006140449.1          | WP_006140448.1         |
| Saccharomonospora xinjiangensis            | WP_006240788.1          | WP_006240787.1         |
| Streptomyces tsukubensis strain=L20        | WP_040914538.1          | WP_006346907.1         |
| Streptomyces reticuliscabiei               | WP_006374278.1          | WP_006374275.1         |
| Streptomyces reticuliscabiei               | WP_006380469.1          | WP_006380468.1         |
| Frankia sp. EUN1f                          | WP_006540198.1          | WP_006540199.1         |
| Streptomyces auratus                       | WP_006602370.1          | WP_006602369.1         |
| Streptomyces sioyaensis                    | WP_129247017.1          | WP_006606507.1         |
| Amycolatopsis decaplanina                  | WP_007031983.1          | WP_007031984.1         |
| Streptomyces sp. C                         | WP_007262351.1          | WP_007262352.1         |
| Streptomyces sp. C                         | WP_007268985.1          | WP_007268986.1         |
| Streptomyces sp. C                         | WP_007269013.1          | WP_007269014.1         |
| Streptomyces sp. SID5470                   | WP_007385254.1          | WP_007385253.1         |
| Streptomyces sp. SID5477                   | WP_007388628.1          | WP_007388627.1         |
| Streptomyces sp. SID5477                   | WP_007444672.1          | WP_007444671.1         |
| Micromonospora lupini                      | WP_007460639.1          | WP_007460637.1         |
| Micromonospora lupini                      | WP_007462140.1          | WP_007462138.1         |
| Streptomyces zinciresistens                | WP_007492831.1          | WP_007492829.1         |
| Streptomyces zinciresistens                | WP_007495833.1          | WP_007495831.1         |
| Ktedonobacter racemifer                    | WP_007917935.1          | WP_007917933.1         |
| Ktedonobacter racemifer                    | WP_007919164.1          | WP_007919165.1         |
| Streptomyces sp. SID8499                   | WP_164393459.1          | WP_009189294.1         |
| Streptomyces ipomoeae strain=88-35         | WP_141581685.1          | WP_009309194.1         |
| Streptomyces ipomoeae strain=88-35         | WP_009311420.1          | WP_009311455.1         |
| Streptomyces himastatinicus                | WP_009714123.1          | WP_009714124.1         |
| Streptomyces himastatinicus                | WP_009714489.1          | WP_009714488.1         |
| Frankia sp. QA3                            | WP_009739944.1          | WP_009739945.1         |
| Streptomyces chartreusis NRRL              | WP_029180778.1          | WP_010034349.1         |
| Streptomyces chartreusis NRRL              | WP_010048567.1          | WP_010048568.1         |
| Streptomyces sp. DfronAA-171               | WP_010266693.1          | WP_010266688.1         |
| Streptomyces acidiscabies 84-104           | WP_269149518.1          | WP_010353750.1         |
| Streptomyces acidiscabies strain=ST105     | WP_010359669.1          | WP_010359670.1         |
| Streptomyces acidiscabies strain=FL01      | WP_010359933.1          | WP_010359931.1         |
| Streptomyces sp. CAI-21                    | WP_175509159.1          | WP_010644658.1         |
| Streptomyces sp. SID5469                   | WP_037650150.1          | WP_010983813.1         |
| Streptomyces sp. SID5469                   | WP_010984270.1          | WP_010984271.1         |
| Streptomyces griseofuscus strain=NRRL      | WP_037659220.1          | WP_011113149.1         |
| Photorhabdus sp. RW14-46                   | WP_011148295.1          | WP_011148294.1         |
| Thermobifida fusca                         | WP_061783561.1          | WP_011291666.1         |
| Frankia sp. CgIS1                          | WP_011438468.1          | WP_011438467.1         |
| Salinispora tropica CNT250                 | WP_012013727.1          | WP_012013726.1         |
| Catenulispora acidiphila                   | WP_012785306.1          | WP_012785307.1         |
| Thermomonospora curvata                    | WP_012853103.1          | WP_012853102.1         |
| Geodermatophilus obscurus                  | WP_243697708.1          | WP_012946392.1         |
| Streptomyces sp. LBUM                      | WP_037723186.1          | WP_013002011.1         |
| Cellulomonas flavigena                     | WP_013118542.1          | WP_013118543.1         |
| Nocardioopsis dassonvillei                 | WP_013155269.1          | WP_013155268.1         |
| Micromonospora sp. ANZ297                  | WP_013286647.1          | WP_013286646.1         |
| Micromonospora aurantiaca                  | WP_013287166.1          | WP_013287165.1         |
| Frankia inefficax                          | WP_157734836.1          | WP_013422505.1         |
| Micromonospora sp. L5                      | WP_013476209.1          | WP_013476210.1         |
| Micromonospora aurantiaca strain=S3        | WP_013476563.1          | WP_013476564.1         |
| Micromonospora maris                       | WP_013733392.1          | WP_013733391.1         |
| Verrucosipora sp. FIM060022                | WP_013734501.1          | WP_013734500.1         |
| Candidatus Frankia datiscaae               | WP_050803296.1          | WP_013872022.1         |
| Candidatus Frankia datiscaae               | WP_013873662.1          | WP_013873663.1         |

|                                      |                |                |
|--------------------------------------|----------------|----------------|
| Candidatus Frankia datisciae         | WP_013874012.1 | WP_013874013.1 |
| Streptomyces sp. DpondAA-F4          | WP_014044193.1 | WP_014044192.1 |
| Streptomyces sp. DpondAA-F4          | WP_014048969.1 | WP_014048970.1 |
| Streptomyces sp. DpondAA-F4          | WP_014050066.1 | WP_014050067.1 |
| Kitasatospora setae strain=NRRL      | WP_014140290.1 | WP_014140291.1 |
| Streptomyces sp. SID7815             | WP_014157321.1 | WP_014157320.1 |
| Streptomyces microflavus strain=CG   | WP_014158007.1 | WP_014158008.1 |
| Streptomyces milbemycinicus          | WP_014175362.1 | WP_014175363.1 |
| Streptomyces corchorusii             | WP_059265785.1 | WP_014669811.1 |
| Streptomyces hygrosopicus subsp.     | WP_041665124.1 | WP_014672285.1 |
| Modestobacter marinus strain=BC501   | WP_014738228.1 | WP_014738227.1 |
| Nocardia brasiliensis strain=HUJEG-1 | WP_141691707.1 | WP_014982308.1 |
| Nocardia brasiliensis strain=HUJEG-1 | WP_014983838.1 | WP_014983839.1 |
| Streptomyces venezuelae ATCC         | WP_071892241.1 | WP_015037162.1 |
| Streptomyces venezuelae ATCC         | WP_015037977.1 | WP_015037976.1 |
| Saccharothrix espanaensis            | WP_015102857.1 | WP_015102858.1 |
| Gloeocapsa sp. PCC                   | WP_015191118.1 | WP_015191117.1 |
| Streptomyces sp. NRRL                | WP_015576416.1 | WP_015576417.1 |
| Actinoplanes sp. N902-109            | WP_041832244.1 | WP_015621176.1 |
| Streptomyces davaonensis             | WP_041819136.1 | WP_015657243.1 |
| Streptomyces davaonensis             | WP_015657288.1 | WP_015657287.1 |
| Saccharomonospora viridis            | WP_015787643.1 | WP_015787644.1 |
| Catenulipora acidiphila              | WP_015792180.1 | WP_015792181.1 |
| Streptomyces sp. HGB0020             | WP_016433755.1 | WP_016433754.1 |
| Streptomyces sp. HGB0020             | WP_016435280.1 | WP_016435279.1 |
| Delftia lacustris                    | WP_016452923.1 | WP_016446729.1 |
| Streptomyces albus strain=DSM        | WP_016468318.1 | WP_016468317.1 |
| Streptomyces albulus strain=NBRC     | WP_016573122.1 | WP_016573123.1 |
| Streptomyces albulus strain=NBRC     | WP_016573740.1 | WP_016573739.1 |
| Actinoalloteichus spitiensis         | WP_016697498.1 | WP_016697497.1 |
| Streptomyces xiaopingdaonensis       | WP_016905307.1 | WP_016905308.1 |
| Streptomyces xiaopingdaonensis       | WP_237720196.1 | WP_016909140.1 |
| Streptomyces sp. SS                  | WP_017237282.1 | WP_017237281.1 |
| Streptomyces sp. SS                  | WP_017237473.1 | WP_017237474.1 |
| Nocardiopsis halophila               | WP_017537041.1 | WP_017537040.1 |
| Nocardiopsis prasina                 | WP_017542867.1 | WP_017542866.1 |
| Nocardiopsis halotolerans            | WP_017571012.1 | WP_017571013.1 |
| Nocardiopsis valliformis             | WP_017579217.1 | WP_017579218.1 |
| Nocardiopsis ganjiahuensis           | WP_026119444.1 | WP_017588245.1 |
| Nocardiopsis ganjiahuensis           | WP_017588783.1 | WP_017588782.1 |
| Nocardiopsis alkaliphila             | WP_017604194.1 | WP_017604193.1 |
| Actinopolyspora halophila            | WP_211210319.1 | WP_017973231.1 |
| Streptomyces sp. SID8375             | WP_018091670.1 | WP_018091671.1 |
| Streptomyces sp. SID4923             | WP_018102924.1 | WP_018102925.1 |
| Streptomyces sp. SID4923             | WP_018106313.1 | WP_018106312.1 |
| Salinispora vitiensis strain=CNT-148 | WP_026184399.1 | WP_018215379.1 |
| Salinispora vitiensis strain=CNT-148 | WP_018215680.1 | WP_018215679.1 |
| Salinispora pacifica CNR114          | WP_018219508.1 | WP_018219509.1 |
| Salinispora mooreana strain=CNT-150  | WP_026189949.1 | WP_018255417.1 |
| Salinispora mooreana strain=CNT-150  | WP_018255698.1 | WP_018255699.1 |
| Streptomyces sp. SID8356             | WP_202438644.1 | WP_018488940.1 |
| Frankia discariae                    | WP_018505689.1 | WP_018505690.1 |
| Streptomyces sp. SID5594             | WP_018511392.1 | WP_018511393.1 |
| Streptomyces sp. SID8373             | WP_018524507.1 | WP_018524506.1 |
| Streptomyces sp. SID8354             | WP_018540028.1 | WP_018540029.1 |
| Streptomyces sp. SID8354             | WP_018540899.1 | WP_018540900.1 |
| Streptomyces sp. LaPpAH-108          | WP_078496022.1 | WP_018547664.1 |
| Streptomyces sp. LaPpAH-108          | WP_018548404.1 | WP_018548403.1 |
| Streptomyces sp. SID4913             | WP_018550720.1 | WP_018550721.1 |
| Streptomyces sp. SID4913             | WP_202453302.1 | WP_018554452.1 |
| Streptomyces sp. BoleA5              | WP_018556702.1 | WP_018556703.1 |
| Streptomyces sp. SID8377             | WP_018563448.1 | WP_018563447.1 |
| Streptomyces sp. Tu                  | WP_037895618.1 | WP_018567017.1 |
| Salinispora arenicola strain=NBRC    | WP_012182822.1 | WP_018584209.1 |
| Salinispora arenicola CNX891         | WP_012182822.1 | WP_018587215.1 |
| Frankia elaeagni                     | WP_195905320.1 | WP_018638250.1 |
| Actinokineospora enzanensis          | WP_018681693.1 | WP_018681694.1 |
| Actinokineospora enzanensis          | WP_018681842.1 | WP_018681841.1 |
| Salinispora pacifica DSM             | WP_018730474.1 | WP_018730473.1 |
| Salinispora pacifica DSM             | WP_018735379.1 | WP_018733389.1 |
| Micromonospora sp. CNB394            | WP_018784081.1 | WP_018784082.1 |
| Micromonospora sp. CNB394            | WP_018788098.1 | WP_018788099.1 |
| Streptomyces sp. ICN441              | WP_017948993.1 | WP_018891018.1 |
| Streptomyces prunicolor              | WP_019061799.1 | WP_019061798.1 |
| Streptomyces hokutonensis            | WP_019070470.1 | WP_019070471.1 |
| Streptomyces sp. TOR3209             | WP_019326887.1 | WP_019326888.1 |

|                                            |                |                |
|--------------------------------------------|----------------|----------------|
| Streptomyces sp. RT42                      | WP_029394634.1 | WP_019330943.1 |
| Streptomyces qinglanensis strain=SCSIO     | WP_027759556.1 | WP_019358450.1 |
| Streptomyces sp. McG7                      | WP_026243822.1 | WP_019524866.1 |
| Streptomyces sp. SID8376                   | WP_019526893.1 | WP_019526894.1 |
| Streptomyces sulphureus                    | WP_019544135.1 | WP_019544136.1 |
| Streptomyces sulphureus                    | WP_019544762.1 | WP_019544761.1 |
| Streptomyces sulphureus                    | WP_245600938.1 | WP_019549458.1 |
| Nocardiopsis sp. CNS-639                   | WP_013155269.1 | WP_019607826.1 |
| Saccharomonospora saliphila                | WP_019819353.1 | WP_019819354.1 |
| Saccharomonospora saliphila                | WP_028662082.1 | WP_019819615.1 |
| Salinispora oceanensis strain=CNT-138      | WP_162562124.1 | WP_019869946.1 |
| Salinispora oceanensis strain=CNT-029      | WP_018730474.1 | WP_019872374.1 |
| Streptomyces purpureus                     | WP_028798083.1 | WP_019890097.1 |
| Streptomyces purpureus strain=JCM          | WP_019891050.1 | WP_019891051.1 |
| Streptomyces sp. SID8381                   | WP_019982644.1 | WP_019982643.1 |
| Streptomyces canus 299MFCChir4.1           | WP_028807426.1 | WP_020115977.1 |
| Streptomyces canus 299MFCChir4.1           | WP_020119316.1 | WP_020119317.1 |
| Streptomyces sp. 303MFCol5.2               | WP_028806148.1 | WP_020125752.1 |
| Streptomyces sp. 303MFCol5.2               | WP_020130969.1 | WP_020130970.1 |
| Streptomyces sp. 351MFTsu5.1               | WP_028809082.1 | WP_020134379.1 |
| Scissionella marina                        | WP_020497318.1 | WP_020497317.1 |
| Embleya scabrispora                        | WP_026218898.1 | WP_020553752.1 |
| Amycolatopsis balhimycina DSM              | WP_026468181.1 | WP_020639073.1 |
| Amycolatopsis balhimycina DSM              | WP_043791969.1 | WP_020639559.1 |
| Amycolatopsis nigrescens                   | WP_026361231.1 | WP_020672329.1 |
| Streptomyces rapamycinicus                 | WP_020867594.1 | WP_020867595.1 |
| Streptomyces collinus                      | WP_020939956.1 | WP_020939957.1 |
| Streptomyces collinus                      | WP_043475893.1 | WP_020940810.1 |
| Photorhabdus temperata                     | WP_051769661.1 | WP_021325341.1 |
| Propionibacterium acidifaciens             | WP_021796846.1 | WP_021796833.1 |
| Streptomyces sp. PVA                       | WP_037787509.1 | WP_023420526.1 |
| Streptomyces roseochromogenus              | WP_031225564.1 | WP_023549569.1 |
| Streptomyces exfoliatus DSM                | WP_024756990.1 | WP_024756989.1 |
| Saccharomonospora piscinae strain=CNQ490   | WP_024873794.1 | WP_024873795.1 |
| Nocardia nova SH22a                        | WP_025347408.1 | WP_025347407.1 |
| Kutzneria albida                           | WP_030111238.1 | WP_025361007.1 |
| Salinispora cortesiana                     | WP_025619232.1 | WP_025619233.1 |
| Nocardiopsis halotolerans                  | WP_017573716.1 | WP_026123013.1 |
| Nocardiopsis alba DSM                      | WP_017533710.1 | WP_026124851.1 |
| Streptomyces sp. CcalMP-8W                 | WP_026237417.1 | WP_026237418.1 |
| Streptomyces sp. SID8379                   | WP_026246029.1 | WP_026246028.1 |
| Actinokineospora enzanensis                | WP_156893358.1 | WP_026316506.1 |
| Actinomadura atramentaria                  | WP_019635010.1 | WP_026341945.1 |
| Actinomadura rifamycini                    | WP_034517042.1 | WP_026401552.1 |
| Actinoalloteichus cyanogriseus strain=NRRL | WP_030105118.1 | WP_026419127.1 |
| Salinispora fenicalii                      | WP_027659908.1 | WP_027659907.1 |
| Salinispora fenicalii                      | WP_018720155.1 | WP_027661146.1 |
| Amycolatopsis thermoflava N1165            | WP_027929273.1 | WP_027929274.1 |
| Salinispora pacifica CNR114                | WP_026185194.1 | WP_028193703.1 |
| Streptomyces sp. 196                       | WP_202438644.1 | WP_028419497.1 |
| Streptomyces sp. DpondAA-D4                | WP_028441963.1 | WP_028441964.1 |
| Nocardia sp. CNY236                        | WP_231390274.1 | WP_028476866.1 |
| Streptomyces sp. 142MFCol3.1               | WP_028798843.1 | WP_028798842.1 |
| Streptomyces sp. 351MFTsu5.1               | WP_020141375.1 | WP_028810254.1 |
| Streptomyces flavidovirens                 | WP_028810382.1 | WP_028810381.1 |
| Pseudonocardia spinosipora                 | WP_051342882.1 | WP_028936629.1 |
| Streptomyces acidiscabies strain=ST105     | WP_223786235.1 | WP_029184073.1 |
| Streptomyces leeuwenhoekii                 | WP_029387171.1 | WP_029387170.1 |
| Nocardia brasiliensis IFM                  | WP_029892440.1 | WP_029892441.1 |
| Nocardia brasiliensis IFM                  | WP_148311041.1 | WP_029901114.1 |
| Streptomyces monomycini                    | WP_030019029.1 | WP_030019028.1 |
| Streptomyces sp. TN58                      | WP_030028304.1 | WP_030028306.1 |
| Streptomyces resistomycificus              | WP_030044559.1 | WP_030044558.1 |
| Streptomyces pyridomyceticus strain=NRRL   | WP_030256587.1 | WP_030057822.1 |
| Streptomyces baarnensis strain=NRRL        | WP_030075921.1 | WP_030075923.1 |
| Streptomyces decoyicus                     | WP_053209086.1 | WP_030083348.1 |
| Streptomyces baarnensis strain=NRRL        | WP_030087338.1 | WP_030087340.1 |
| Streptomyces californicus strain=FDAARGOS  | WP_030119114.1 | WP_030119115.1 |
| Streptomyces californicus strain=FDAARGOS  | WP_030119114.1 | WP_030120248.1 |
| Streptomyces flavovirens strain=NRRL       | WP_030635159.1 | WP_030123299.1 |
| Streptomyces sp. NRRL                      | WP_030164869.1 | WP_030164872.1 |
| Streptomyces violaceorubidus               | WP_030181358.1 | WP_030181360.1 |
| Streptomyces violaceorubidus               | WP_030190096.1 | WP_030190093.1 |
| Streptomyces californicus strain=FDAARGOS  | WP_030193709.1 | WP_030193706.1 |
| Streptomyces sp. NRRL                      | WP_030204351.1 | WP_030204354.1 |
| Streptomyces sp. NRRL                      | WP_030205685.1 | WP_030205687.1 |

|                                                |                |                |
|------------------------------------------------|----------------|----------------|
| Streptomyces bikiniensis strain=NRRL           | WP_030213844.1 | WP_030213841.1 |
| Streptomyces sp. NRRL                          | WP_030223160.1 | WP_030223164.1 |
| Streptomyces lavendulae subsp.                 | WP_030234407.1 | WP_030234403.1 |
| Streptomyces sp. NRRL                          | WP_030239734.1 | WP_030239736.1 |
| Streptomyces lavendulae subsp.                 | WP_030242182.1 | WP_030242183.1 |
| Streptomyces sp. NRRL                          | WP_030251317.1 | WP_030251321.1 |
| Streptacidiphilus jeojiense                    | WP_030253203.1 | WP_030253202.1 |
| Streptomyces sp. NRRL                          | WP_030265083.1 | WP_030265080.1 |
| Streptomyces violens                           | WP_030265810.1 | WP_030265812.1 |
| Kitasatospora psammotica                       | WP_078867236.1 | WP_030282574.1 |
| Streptomyces catenulae                         | WP_030282614.1 | WP_030282615.1 |
| Streptomyces catenulae                         | WP_030283701.1 | WP_030283699.1 |
| Kitasatospora psammotica                       | WP_030287692.1 | WP_030287694.1 |
| Streptomyces katrae strain=NRRL                | WP_030302853.1 | WP_030302851.1 |
| Streptomyces sp. NRRL                          | WP_030314742.1 | WP_030314744.1 |
| Streptomyces sp. NRRL                          | WP_030319876.1 | WP_030319877.1 |
| Streptomyces flavochromogenes                  | WP_030324542.1 | WP_030324544.1 |
| Micromonospora parva                           | WP_030329369.1 | WP_030329368.1 |
| Streptomyces sp. NRRL                          | WP_030329569.1 | WP_030329565.1 |
| Micromonospora parva                           | WP_030332977.1 | WP_030332978.1 |
| Streptomyces sp. NRRL                          | WP_030340082.1 | WP_030340080.1 |
| Streptomyces sp. NRRL                          | WP_030340971.1 | WP_030340969.1 |
| Streptomyces sp. NRRL                          | WP_030342513.1 | WP_030342511.1 |
| Streptomyces scopuliridis RB72                 | WP_030349269.1 | WP_030349268.1 |
| Streptomyces roseovorticillatus strain=NRRL    | WP_030369961.1 | WP_030369962.1 |
| Streptomyces rimosus subsp.                    | WP_032920569.1 | WP_030372735.1 |
| Streptomyces rimosus subsp.                    | WP_030373438.1 | WP_030373437.1 |
| Streptomyces sp. NRRL                          | WP_030381146.1 | WP_030381145.1 |
| Streptomyces sp. 3211.3                        | WP_030384549.1 | WP_030384550.1 |
| Kitasatospora purpeofusca                      | WP_030396292.1 | WP_030396293.1 |
| Kitasatospora purpeofusca                      | WP_030396589.1 | WP_030396588.1 |
| Kitasatospora purpeofusca                      | WP_051757018.1 | WP_030398157.1 |
| Streptomyces sp. NRRL                          | WP_030402551.1 | WP_030402550.1 |
| Streptomyces ardesiacus                        | WP_030402764.1 | WP_030402765.1 |
| Streptomyces sp. NRRL                          | WP_030409394.1 | WP_030409395.1 |
| Streptomyces sp. 9-7                           | WP_201802604.1 | WP_030411157.1 |
| Streptomyces sp. NRRL                          | WP_030420249.1 | WP_030420248.1 |
| Streptomyces sp. TP-A0875                      | WP_030420980.1 | WP_030420981.1 |
| Kitasatospora niigatensis                      | WP_030460038.1 | WP_030460037.1 |
| Kitasatospora sp. NRRL                         | WP_030461215.1 | WP_030461214.1 |
| Kitasatospora sp. NRRL                         | WP_030461724.1 | WP_030461723.1 |
| Lentzea aerocolonigenes                        | WP_030465055.1 | WP_030465054.1 |
| Lentzea albidocapillata                        | WP_030474579.1 | WP_030474580.1 |
| Micromonospora chokoriensis strain=NRRL        | WP_084597712.1 | WP_030486489.1 |
| Micromonospora chokoriensis strain=NRRL        | WP_030492080.1 | WP_030492079.1 |
| Micromonospora purpureochromogenes strain=NRRL | WP_030504433.1 | WP_030504434.1 |
| Nocardia sp. NRRL                              | WP_030515839.1 | WP_030515840.1 |
| Streptomyces albus subsp.                      | WP_030545955.1 | WP_030545962.1 |
| Streptomyces sp. KY75                          | WP_030562204.1 | WP_030562206.1 |
| Streptomyces anulatus strain=NRRL              | WP_030587047.1 | WP_030587044.1 |
| Streptomyces anulatus strain=NRRL              | WP_030590906.1 | WP_030590908.1 |
| Streptomyces griseoflavus strain=NRRL          | WP_033022242.1 | WP_030596607.1 |
| Streptomyces fulvoviolaceus                    | WP_030600318.1 | WP_030600316.1 |
| Streptomyces achromogenes subsp.               | WP_030616787.1 | WP_030616784.1 |
| Streptomyces achromogenes subsp.               | WP_030619581.1 | WP_030619584.1 |
| Streptomyces achromogenes subsp.               | WP_030620814.1 | WP_030620811.1 |
| Streptomyces albus subsp.                      | WP_030087338.1 | WP_030628044.1 |
| Streptomyces rimosus subsp.                    | WP_033014516.1 | WP_030629358.1 |
| Streptomyces griseolus strain=NRRL             | WP_030630720.1 | WP_030630722.1 |
| Streptomyces rimosus subsp.                    | WP_032920569.1 | WP_030641571.1 |
| Streptomyces antibioticus strain=NRRL          | WP_030649970.1 | WP_030649972.1 |
| Streptomyces sp. WAC05950                      | WP_030650395.1 | WP_030650392.1 |
| Streptomyces cinnamomensis                     | WP_199822245.1 | WP_030654459.1 |
| Streptomyces sp. NRRL                          | WP_030656652.1 | WP_030656654.1 |
| Streptomyces rimosus subsp.                    | WP_032917032.1 | WP_030663942.1 |
| Streptomyces cellulosa                         | WP_199923619.1 | WP_030666352.1 |
| Streptomyces sp. NRRL                          | WP_030673520.1 | WP_030673522.1 |
| Streptomyces cellulosa                         | WP_030678580.1 | WP_030678583.1 |
| Streptomyces cellulosa                         | WP_030683246.1 | WP_030683248.1 |
| Streptomyces globisporus subsp.                | WP_030690529.1 | WP_030690530.1 |
| Streptomyces sp. NRRL                          | WP_030718891.1 | WP_030718888.1 |
| Streptomyces pluricolorscens                   | WP_229823766.1 | WP_030720922.1 |
| Streptomyces sp. NRRL                          | WP_030723401.1 | WP_030723403.1 |
| Streptomyces sp. NRRL                          | WP_030725721.1 | WP_030725718.1 |
| Streptomyces sp. NRRL                          | WP_030735445.1 | WP_030735443.1 |
| Streptomyces sp. NRRL                          | WP_030743825.1 | WP_030743823.1 |

|                                            |                |                |
|--------------------------------------------|----------------|----------------|
| Streptomyces sp. NRRL                      | WP_030758655.1 | WP_030758657.1 |
| Streptomyces sp. NRRL                      | WP_030759912.1 | WP_030759915.1 |
| Streptomyces sp. NRRL                      | WP_030765726.1 | WP_030765723.1 |
| Streptomyces sp. NRRL                      | WP_030766484.1 | WP_030766485.1 |
| Streptomyces sp. DSM                       | WP_030783113.1 | WP_030783116.1 |
| Streptomyces sp. DSM                       | WP_030792818.1 | WP_030792824.1 |
| Streptomyces sp. NRRL                      | WP_030804488.1 | WP_030804491.1 |
| Streptomyces sp. NRRL                      | WP_030811870.1 | WP_030811868.1 |
| Streptomyces sp. NRRL                      | WP_030818022.1 | WP_030818020.1 |
| Streptomyces sp. XY152                     | WP_030818962.1 | WP_030818960.1 |
| Streptomyces sp. NRRL                      | WP_030821313.1 | WP_030821309.1 |
| Streptomyces sp. XY152                     | WP_030829985.1 | WP_030829982.1 |
| Streptomyces hygrosopicus subsp.           | WP_030832485.1 | WP_030832487.1 |
| Streptomyces sp. NRRL                      | WP_030847760.1 | WP_030847763.1 |
| Streptomyces sp. NRRL                      | WP_030848316.1 | WP_030848314.1 |
| Streptomyces sp. NRRL                      | WP_030862888.1 | WP_030862891.1 |
| Streptomyces sp. NRRL                      | WP_030870430.1 | WP_030870428.1 |
| Streptomyces sp. NRRL                      | WP_030635159.1 | WP_030877068.1 |
| Streptomyces varsoviensis strain=NRRL      | WP_030878087.1 | WP_030878084.1 |
| Streptomyces varsoviensis strain=NRRL      | WP_030885550.1 | WP_030885551.1 |
| Streptomyces sp. XY66                      | WP_030818022.1 | WP_030895697.1 |
| Streptomyces virginiae                     | WP_030650395.1 | WP_030897745.1 |
| Streptomyces sp. NRRL                      | WP_030928994.1 | WP_030928991.1 |
| Streptomyces sp. NRRL                      | WP_030931343.1 | WP_030931340.1 |
| Streptomyces sp. NRRL                      | WP_030949619.1 | WP_030949618.1 |
| Streptomyces sp. NRRL                      | WP_030965475.1 | WP_030965473.1 |
| Streptomyces sp. PAN                       | WP_093746084.1 | WP_030967838.1 |
| Streptomyces sp. Osf17                     | WP_029394634.1 | WP_030970827.1 |
| Streptomyces sp. NRRL                      | WP_030975367.1 | WP_030975369.1 |
| Streptomyces sp. NRRL                      | WP_030983599.1 | WP_030983597.1 |
| Streptomyces sp. MC1                       | WP_030656652.1 | WP_030986201.1 |
| Streptomyces sp. NRRL                      | WP_030649970.1 | WP_030988305.1 |
| Streptomyces sp. NRRL                      | WP_030997655.1 | WP_030997654.1 |
| Streptomyces sp. NRRL                      | WP_019326887.1 | WP_031016278.1 |
| Streptomyces sp. NRRL                      | WP_031019662.1 | WP_031019663.1 |
| Streptomyces albus strain=CAS922           | WP_164439430.1 | WP_031027301.1 |
| Streptomyces sp. VN1                       | WP_031039540.1 | WP_031039542.1 |
| Streptomyces sp. NRRL                      | WP_031042487.1 | WP_031042484.1 |
| Streptomyces sp. NRRL                      | WP_031043269.1 | WP_031043271.1 |
| Streptomyces sp. NRRL                      | WP_031044165.1 | WP_031044161.1 |
| Streptomyces pseudovenezuelae              | WP_031059940.1 | WP_031059938.1 |
| Streptomyces sp. NRRL                      | WP_006134517.1 | WP_031061038.1 |
| Streptomyces sp. NRRL                      | WP_031065891.1 | WP_031065894.1 |
| Streptomyces ochraceiscleroticus           | WP_031067204.1 | WP_031067203.1 |
| Streptomyces sp. NRRL                      | WP_031072975.1 | WP_031072972.1 |
| Streptomyces sp. NRRL                      | WP_031082067.1 | WP_031082064.1 |
| Streptomyces sp. NRRL                      | WP_031086835.1 | WP_031086832.1 |
| Streptomyces sp. NRRL                      | WP_031087132.1 | WP_031087131.1 |
| Streptomyces sp. NRRL                      | WP_031095948.1 | WP_031095950.1 |
| Streptomyces sp. MC1                       | WP_231407449.1 | WP_031099715.1 |
| Streptomyces sp. NRRL                      | WP_031104667.1 | WP_031104668.1 |
| Streptomyces sp. NRRL                      | WP_199808622.1 | WP_031110852.1 |
| Streptomyces sp. 2R                        | WP_031121791.1 | WP_031121790.1 |
| Streptomyces erythrochromogenes            | WP_031157532.1 | WP_031157534.1 |
| Streptomyces durhamensis                   | WP_031169544.1 | WP_031169546.1 |
| Streptosporangium roseum strain=NRRL       | WP_031172340.1 | WP_031172338.1 |
| Streptomyces durhamensis                   | WP_031173143.1 | WP_031173141.1 |
| Streptomyces seoulensis                    | WP_031184013.1 | WP_031184014.1 |
| Streptomyces ardesiacus                    | WP_031082067.1 | WP_031184969.1 |
| Streptomyces rimosus subsp.                | WP_032914058.1 | WP_031187263.1 |
| Streptomyces bicolor strain=NRRL           | WP_031485741.1 | WP_031485739.1 |
| Streptomyces bicolor strain=NRRL           | WP_031488003.1 | WP_031488004.1 |
| Streptomyces megasporus                    | WP_031510405.1 | WP_031510406.1 |
| Streptomyces sp. NRRL                      | WP_031519573.1 | WP_031519570.1 |
| Streptomyces sp. HCCB10043                 | WP_006126304.1 | WP_032770950.1 |
| Streptomyces sp. ms115                     | WP_257134660.1 | WP_032788923.1 |
| Streptomyces viridochromogenes strain=NRRL | WP_033202498.1 | WP_033202497.1 |
| Streptomyces viridochromogenes strain=NRRL | WP_033205685.1 | WP_033205682.1 |
| Kitasatospora phosalacinea                 | WP_033213217.1 | WP_033213216.1 |
| Kitasatospora phosalacinea                 | WP_033219823.1 | WP_033219822.1 |
| Streptomyces virginiae strain=NRRL         | WP_033225798.1 | WP_033225797.1 |
| Streptomyces albidoflavus strain=NRRL      | WP_033239866.1 | WP_033239865.1 |
| Kitasatospora phosalacinea strain=NRRL     | WP_033254140.1 | WP_033254141.1 |
| Kitasatospora phosalacinea strain=NRRL     | WP_033255040.1 | WP_033255039.1 |
| Streptomyces atroolivaceus                 | WP_033304909.1 | WP_033304910.1 |
| Streptomyces iakyrus                       | WP_033313353.1 | WP_033313354.1 |

|                                                  |                |                |
|--------------------------------------------------|----------------|----------------|
| <i>Streptomyces yerevanensis</i>                 | WP_033324412.1 | WP_033324411.1 |
| <i>Streptomyces yerevanensis</i>                 | WP_033324682.1 | WP_033324681.1 |
| <i>Dactylosporangium aurantiacum</i>             | WP_033357105.1 | WP_033357104.1 |
| <i>Dactylosporangium aurantiacum</i>             | WP_033358197.1 | WP_033358198.1 |
| <i>Kibdelosporangium aridum</i>                  | WP_084433585.1 | WP_033387955.1 |
| <i>Saccharothrix syringae</i>                    | WP_033434847.1 | WP_033434846.1 |
| <i>Kitasatospora</i> sp. MBT63                   | WP_033817610.1 | WP_033817609.1 |
| <i>Streptomyces</i> sp. G11C                     | WP_215221381.1 | WP_033952009.1 |
| <i>Actinospica robiniae</i>                      | WP_034260572.1 | WP_034260574.1 |
| <i>Amycolatopsis lurida</i>                      | WP_034310251.1 | WP_034310253.1 |
| <i>Actinomadura oligospora</i>                   | WP_026416406.1 | WP_034489261.1 |
| <i>Actinokineospora spheciospongiae</i>          | WP_035279746.1 | WP_035279749.1 |
| <i>Azospirillum brasilense</i> strain=BR11019    | WP_174442884.1 | WP_035680613.1 |
| <i>Frankia</i> sp. Allo2                         | WP_035731836.1 | WP_035731839.1 |
| <i>Kitasatospora azatica</i>                     | WP_035847285.1 | WP_035847284.1 |
| <i>Kitasatospora cheerisanensis</i>              | WP_035869826.1 | WP_035869829.1 |
| <i>Modestobacter caceresii</i>                   | WP_036333923.1 | WP_036333922.1 |
| <i>Nocardia violaceofusca</i> NBRC               | WP_036508177.1 | WP_036508180.1 |
| <i>Paenibacillus</i> sp. FSL                     | WP_051493803.1 | WP_036697312.1 |
| <i>Paenibacillus</i> sp. FSL                     | WP_235191802.1 | WP_036723281.1 |
| <i>Photorhabdus akhurstii</i> strain=DSM         | WP_052105790.1 | WP_036779564.1 |
| <i>Photorhabdus stackebrandtii</i>               | WP_239002557.1 | WP_036844644.1 |
| <i>Kibdelosporangium aridum</i> strain=A82846    | WP_037268019.1 | WP_037268020.1 |
| <i>Kibdelosporangium aridum</i> strain=A82846    | WP_037274676.1 | WP_037274678.1 |
| <i>Saccharomonospora viridis</i> strain=ATCC     | WP_037308953.1 | WP_037308956.1 |
| <i>Amycolatopsis</i> sp. WAC                     | WP_052121280.1 | WP_037347704.1 |
| <i>Streptomyces aureus</i>                       | WP_037617932.1 | WP_037617930.1 |
| <i>Streptomyces aureus</i>                       | WP_037625473.1 | WP_037625475.1 |
| <i>Streptomyces aureus</i>                       | WP_037625488.1 | WP_037625490.1 |
| <i>Streptomyces griseorubens</i>                 | WP_033277091.1 | WP_037638153.1 |
| <i>Streptomyces bicolor</i> strain=NRRL          | WP_031485366.1 | WP_037641255.1 |
| <i>Streptomyces griseorubens</i>                 | WP_033277712.1 | WP_037643484.1 |
| <i>Streptomyces griseofuscus</i>                 | WP_037653387.1 | WP_037653386.1 |
| <i>Streptomyces griseus</i> subsp.               | WP_037671855.1 | WP_037671854.1 |
| <i>Streptomyces griseus</i> subsp.               | WP_037679600.1 | WP_037679602.1 |
| <i>Streptomyces scabiei</i> strain=NCPPB         | WP_037690153.1 | WP_037690150.1 |
| <i>Streptomyces scabiei</i> strain=NCPPB         | WP_199924042.1 | WP_037700064.1 |
| <i>Streptomyces harbinensis</i>                  | WP_019432351.1 | WP_037755474.1 |
| <i>Streptomyces</i> sp. FXJ7.023                 | WP_031039540.1 | WP_037760056.1 |
| <i>Streptomyces</i> sp. SID8354                  | WP_018542709.1 | WP_037813717.1 |
| <i>Streptomyces</i> sp. NRRL                     | WP_030984774.1 | WP_037839204.1 |
| <i>Streptomyces</i> sp. NRRL                     | WP_037857064.1 | WP_037857060.1 |
| <i>Streptomyces</i> sp. NRRL                     | WP_031013741.1 | WP_037881000.1 |
| <i>Streptomyces</i> sp. NRRL                     | WP_030205618.1 | WP_037890172.1 |
| <i>Streptomyces</i> sp. PCS3-D2                  | WP_037922230.1 | WP_037922231.1 |
| <i>Streptomyces toyocaensis</i>                  | WP_037938360.1 | WP_037938359.1 |
| <i>Streptomyces</i> sp. PRh5                     | WP_037962532.1 | WP_037962529.1 |
| <i>Streptomyces albulus</i> strain=NK660         | WP_016573122.1 | WP_038523119.1 |
| <i>Salinispora arenicola</i> CNS744              | WP_038842796.1 | WP_038842793.1 |
| <i>Paenibacillus</i> sp. IHB                     | WP_047013851.1 | WP_039301929.1 |
| <i>Streptomyces</i> sp. 769                      | WP_039638401.1 | WP_039638402.1 |
| <i>Streptomyces</i> sp. MUSC                     | WP_039654977.1 | WP_039654976.1 |
| <i>Nocardia cerradoensis</i>                     | WP_039778997.1 | WP_039778998.1 |
| <i>Nocardia araoensis</i>                        | WP_039800143.1 | WP_039800144.1 |
| <i>Nocardia otitidiscaviarum</i> strain=NCTC1934 | WP_039814768.1 | WP_039814770.1 |
| <i>Streptomyces</i> sp. 769                      | WP_040108248.1 | WP_040108251.1 |
| <i>Amycolatopsis nigrescens</i>                  | WP_020667139.1 | WP_040405555.1 |
| <i>Amycolatopsis nigrescens</i>                  | WP_020673770.1 | WP_040406252.1 |
| <i>Ktedonobacter racemifer</i>                   | WP_007907420.1 | WP_040442429.1 |
| <i>Nocardia vinacea</i>                          | WP_040692652.1 | WP_040692654.1 |
| <i>Nocardia takedensis</i>                       | WP_040713784.1 | WP_040713786.1 |
| <i>Nocardia veterana</i> strain=DSM              | WP_040724439.1 | WP_040724441.1 |
| <i>Nocardia tenerifensis</i>                     | WP_246003098.1 | WP_040741519.1 |
| <i>Nocardia transvalensis</i>                    | WP_040753305.1 | WP_040753306.1 |
| <i>Nocardia pneumoniae</i>                       | WP_040781394.1 | WP_040781396.1 |
| <i>Nocardia paucivorans</i>                      | WP_040792242.1 | WP_040792241.1 |
| <i>Nocardia higoensis</i>                        | WP_040797408.1 | WP_040797407.1 |
| <i>Nocardia concava</i>                          | WP_040803422.1 | WP_040803420.1 |
| <i>Nocardia exalbida</i>                         | WP_040872019.1 | WP_040872018.1 |
| <i>Streptomyces vietnamensis</i>                 | WP_041131687.1 | WP_041131688.1 |
| <i>Streptomyces vietnamensis</i>                 | WP_041132762.1 | WP_041132763.1 |
| <i>Streptomyces</i> sp. AcH                      | WP_041993320.1 | WP_041993322.1 |
| <i>Streptomyces lydicamycinicus</i>              | WP_042152338.1 | WP_042152341.1 |
| <i>Streptomyces lydicamycinicus</i>              | WP_042157789.1 | WP_042158824.1 |
| <i>Streptomyces</i> sp. NBRC                     | WP_042164030.1 | WP_042164029.1 |
| <i>Streptomyces</i> sp. AVP053U2                 | WP_042173708.1 | WP_042173710.1 |

|                                          |                |                |
|------------------------------------------|----------------|----------------|
| Kibdelosporangium sp. MJ126-NF4          | WP_042191302.1 | WP_042191300.1 |
| Kibdelosporangium sp. MJ126-NF4          | WP_232328348.1 | WP_042193149.1 |
| Paenibacillus borealis                   | WP_042210952.1 | WP_042210953.1 |
| Nocardia brasiliensis strain=NCTC11294   | WP_042254358.1 | WP_042254357.1 |
| Streptacidiphilus neutrinimicus          | WP_042372855.1 | WP_042372853.1 |
| Streptacidiphilus melanogenes            | WP_042387315.1 | WP_042387314.1 |
| Streptacidiphilus anmyonensis            | WP_042418294.1 | WP_042417968.1 |
| Streptacidiphilus anmyonensis            | WP_042418136.1 | WP_042418139.1 |
| Streptacidiphilus anmyonensis            | WP_042431796.1 | WP_042431797.1 |
| Streptacidiphilus albus strain=NBRC      | WP_034089980.1 | WP_042439897.1 |
| Streptomyces sp. NRRL                    | WP_043222236.1 | WP_043222238.1 |
| Streptomyces sp. NRRL                    | WP_043223691.1 | WP_043223689.1 |
| Streptomyces hydrogenans                 | WP_190224328.1 | WP_043231807.1 |
| Streptomyces violaceusniger Tu           | WP_014055768.1 | WP_043238495.1 |
| Streptomyces vinaceus strain=NRRL        | WP_030329569.1 | WP_043248648.1 |
| Streptomyces sp. CT34                    | WP_043263258.1 | WP_043263257.1 |
| Streptomyces sp. CT34                    | WP_043264772.1 | WP_043264771.1 |
| Micromonospora sp. XM-20-01              | WP_043323617.1 | WP_043323619.1 |
| Streptomyces mutabilis strain=JCM        | WP_191886786.1 | WP_043379936.1 |
| Streptomyces nodosus strain=ZJB2016050   | WP_150478232.1 | WP_043441484.1 |
| Streptomyces nodosus strain=ZJB2016050   | WP_043445958.1 | WP_043445955.1 |
| Streptomyces fulvoviolaceus              | WP_030615795.1 | WP_043456491.1 |
| Streptomyces xinghaiensis strain=OlgR    | WP_043461718.1 | WP_043461717.1 |
| Kitasatospora sp. MBT66                  | WP_030396589.1 | WP_043476903.1 |
| Streptomyces glaucescens strain=GLA.O    | WP_159072834.1 | WP_043505397.1 |
| Streptomyces glaucescens strain=GLA.O    | WP_043505415.1 | WP_043505413.1 |
| Nonomuraea candida                       | WP_052422960.1 | WP_043622790.1 |
| Nocardia vulneris                        | WP_156161394.1 | WP_043663372.1 |
| Nocardia vulneris                        | WP_043666495.1 | WP_043666492.1 |
| Streptomyces xylophagus                  | WP_043667173.1 | WP_043667170.1 |
| Nocardia abscessus                       | WP_043693297.1 | WP_043693299.1 |
| Kutzneria sp. 744                        | WP_043718729.1 | WP_043718727.1 |
| Kutzneria sp. 744                        | WP_198047787.1 | WP_043718804.1 |
| Nocardia asiatica                        | WP_043730177.1 | WP_043730181.1 |
| Amycolatopsis rifamycinica               | WP_235190735.1 | WP_043777863.1 |
| Amycolatopsis orientalis DSM             | WP_043832850.1 | WP_043832848.1 |
| Kitasatospora griseola                   | WP_043910450.1 | WP_043910453.1 |
| Kitasatospora griseola                   | WP_043910493.1 | WP_043910492.1 |
| Kitasatospora griseola                   | WP_043912009.1 | WP_043912010.1 |
| Streptomyces natalensis                  | WP_044366878.1 | WP_044366877.1 |
| Streptomyces cyaneogriseus               | WP_044378745.1 | WP_044378742.1 |
| Streptomyces albulus strain=CK-15        | WP_016573122.1 | WP_044378892.1 |
| Streptomyces cyaneogriseus               | WP_044386965.1 | WP_044386967.1 |
| Amycolatopsis orientalis                 | WP_044852706.1 | WP_044852707.1 |
| Saccharothrix sp. ST-888                 | WP_045303801.1 | WP_045303800.1 |
| Lentzea aerocolonigenes strain=NRRL      | WP_045309298.1 | WP_045309299.1 |
| Streptomyces sp. TN58                    | WP_199838695.1 | WP_045321080.1 |
| Streptomyces sp. cf124                   | WP_093790725.1 | WP_045558718.1 |
| Streptomyces sp. cf124                   | WP_045563495.1 | WP_045563494.1 |
| Streptomyces sp. FxanaA7                 | WP_045563578.1 | WP_045563579.1 |
| Streptomyces rubellomurinus              | WP_045693276.1 | WP_045693277.1 |
| Streptomyces katrae                      | WP_045946966.1 | WP_045946967.1 |
| Photorhabdus luminescens NBAII           | WP_052105790.1 | WP_046396662.1 |
| Streptomyces malaysiense                 | WP_046422180.1 | WP_046422179.1 |
| Streptomyces mangrovisoli                | WP_046584971.1 | WP_046584970.1 |
| Streptomyces europaescabiei strain=96-14 | WP_046704005.1 | WP_046704004.1 |
| Streptomyces humi                        | WP_046728249.1 | WP_046728248.1 |
| Streptomyces humi                        | WP_046729399.1 | WP_046729400.1 |
| Streptomyces yangpuensis                 | WP_157879752.1 | WP_046778253.1 |
| Streptomyces showdoensis                 | WP_046906201.1 | WP_046906200.1 |
| Streptomyces showdoensis                 | WP_046906673.1 | WP_046906672.1 |
| Streptomyces sp. 1222.2                  | WP_046912982.1 | WP_046912983.1 |
| Streptomyces lydicus strain=A02          | WP_046923988.1 | WP_046923989.1 |
| Streptomyces lydicus strain=A02          | WP_046924846.1 | WP_046924845.1 |
| Photorhabdus thracensis                  | WP_052760818.1 | WP_046975013.1 |
| Streptomyces sp. CNQ-509                 | WP_145783816.1 | WP_047016599.1 |
| Streptomyces sp. CNZ287                  | WP_047019019.1 | WP_047019020.1 |
| Hoeflea sp. IMCC20628                    | WP_156174538.1 | WP_047031057.1 |
| Delftia lacustris strain=LZ-C            | WP_047219561.1 | WP_047219560.1 |
| Frankia sp. BMG5.30                      | WP_047221789.1 | WP_047221788.1 |
| Frankia coriariae                        | WP_047223900.1 | WP_047223901.1 |
| Nocardiopsis sp. RV163                   | WP_047868038.1 | WP_047868039.1 |
| Micromonospora sp. RV43                  | WP_047892979.1 | WP_047892978.1 |
| Micromonospora sp. RV43                  | WP_047894521.1 | WP_047894522.1 |
| Streptomyces sp. ADI91-18                | WP_008742304.1 | WP_047961193.1 |
| Streptomyces sp. HNS054                  | WP_048456510.1 | WP_048456509.1 |

|                                                      |                |                |
|------------------------------------------------------|----------------|----------------|
| <i>Streptomyces roseus</i>                           | WP_048480084.1 | WP_048480085.1 |
| <i>Streptomyces viridochromogenes</i> strain=NRRL    | WP_048579125.1 | WP_048579250.1 |
| <i>Streptomyces viridochromogenes</i> strain=NRRL    | WP_048582899.1 | WP_048582898.1 |
| <i>Nocardopsis</i> sp. SBT366                        | WP_049579151.1 | WP_049579149.1 |
| <i>Photorhabdus luminescens</i> strain=ATCC          | WP_080985084.1 | WP_049584498.1 |
| <i>Kitasatospora xanthocidica</i> strain=MMS17-GH009 | WP_049659039.1 | WP_049659038.1 |
| <i>Streptomyces caatingaensis</i>                    | WP_049714123.1 | WP_049714124.1 |
| <i>Streptomyces caatingaensis</i>                    | WP_049716247.1 | WP_049716006.1 |
| <i>Streptomyces caatingaensis</i>                    | WP_049717080.1 | WP_049717079.1 |
| <i>Streptomyces europaeiscabiei</i> strain=NCPBP     | WP_050357095.1 | WP_050357096.1 |
| <i>Streptomyces acidiscabiei</i> strain=NCPBP        | WP_050374529.1 | WP_050374462.1 |
| <i>Streptomyces acidiscabiei</i> strain=NCPBP        | WP_050375860.1 | WP_050375722.1 |
| <i>Streptomyces rimosus</i> subsp.                   | WP_030668722.1 | WP_050514942.1 |
| <i>Frankia alni</i>                                  | WP_041939496.1 | WP_050997179.1 |
| <i>Frankia</i> sp. QA3                               | WP_051054113.1 | WP_051054534.1 |
| <i>Actinokineospora enzanensis</i>                   | WP_033400372.1 | WP_051114775.1 |
| <i>Saccharothrix syringae</i>                        | WP_033430990.1 | WP_051765703.1 |
| <i>Streptomyces</i> sp. NRRL                         | WP_030808116.1 | WP_051798617.1 |
| <i>Streptomyces albus</i> subsp.                     | WP_031176402.1 | WP_051803636.1 |
| <i>Streptomyces griseus</i> subsp.                   | WP_030756043.1 | WP_051804580.1 |
| <i>Streptomyces flavochromogenes</i>                 | WP_030321431.1 | WP_051820597.1 |
| <i>Streptomyces microflavus</i>                      | WP_031124558.1 | WP_051821916.1 |
| <i>Streptomyces</i> sp. NRRL                         | WP_030905199.1 | WP_051840077.1 |
| <i>Streptomyces xanthophaeus</i>                     | WP_031151315.1 | WP_051858854.1 |
| <i>Streptomyces exfoliatus</i>                       | WP_051874446.1 | WP_051874447.1 |
| <i>Kitasatospora medicidica</i>                      | WP_035803277.1 | WP_051967271.1 |
| <i>Actinokineospora mzabensis</i> strain=CECT        | WP_035280228.1 | WP_052020894.1 |
| <i>Actinokineospora mzabensis</i> strain=CECT        | WP_181399936.1 | WP_052021392.1 |
| <i>Streptomyces</i> sp. MUSC                         | WP_039653137.1 | WP_052269939.1 |
| <i>Amycolatopsis taiwanensis</i>                     | WP_027941848.1 | WP_052371535.1 |
| <i>Streptomyces roseoverticillatus</i> strain=NRRL   | WP_030366023.1 | WP_052392594.1 |
| <i>Streptomyces</i> sp. NRRL                         | WP_234343608.1 | WP_052397602.1 |
| <i>Streptomyces</i> sp. NRRL                         | WP_159011955.1 | WP_052397638.1 |
| <i>Streptomyces vietnamensis</i>                     | WP_041130148.1 | WP_052499199.1 |
| <i>Luteipulveratus mongoliensis</i>                  | WP_052596581.1 | WP_052590400.1 |
| <i>Streptomyces avicenniae</i>                       | WP_052852531.1 | WP_052852530.1 |
| <i>Streptomyces niger</i>                            | WP_052863077.1 | WP_052863076.1 |
| <i>Streptomyces ambofaciens</i> strain=DSM           | WP_053125871.1 | WP_053125868.1 |
| <i>Streptomyces ambofaciens</i>                      | WP_053137069.1 | WP_053137066.1 |
| <i>Streptomyces resistomycificus</i>                 | WP_030038588.1 | WP_053192394.1 |
| <i>Streptomyces viridochromogenes</i> strain=NRRL    | WP_048579125.1 | WP_053198604.1 |
| <i>Streptomyces decoyicus</i>                        | WP_030082856.1 | WP_053209015.1 |
| <i>Streptomyces antibioticus</i> strain=NRRL         | WP_030656652.1 | WP_053212743.1 |
| <i>Streptomyces</i> sp. COG20                        | WP_222518234.1 | WP_053560103.1 |
| <i>Streptomyces</i> sp. H036                         | WP_030650395.1 | WP_053625965.1 |
| <i>Streptomyces cinnamomensis</i>                    | WP_030650395.1 | WP_053628071.1 |
| <i>Streptomyces</i> sp. MMG1064                      | WP_030818022.1 | WP_053629579.1 |
| <i>Streptomyces</i> sp. XY413                        | WP_053706443.1 | WP_053631600.1 |
| <i>Streptomyces</i> sp. MMG1064                      | WP_030821313.1 | WP_053632822.1 |
| <i>Streptomyces diastaticus</i> strain=SID7513       | WP_030402764.1 | WP_053637533.1 |
| <i>Streptomyces</i> sp. NRRL                         | WP_031082067.1 | WP_053637982.1 |
| <i>Streptomyces</i> sp. NRRL                         | WP_053645746.1 | WP_053645748.1 |
| <i>Streptomyces</i> sp. NRRL                         | WP_053649916.1 | WP_053649918.1 |
| <i>Micromonospora</i> sp. NRRL                       | WP_053659925.1 | WP_053659927.1 |
| <i>Streptomyces</i> sp. NRRL                         | WP_053669415.1 | WP_053669414.1 |
| <i>Streptomyces</i> sp. WM4235                       | WP_053677109.1 | WP_053677110.1 |
| <i>Streptomyces</i> sp. XY66                         | WP_053631601.1 | WP_053677305.1 |
| <i>Streptomyces</i> sp. IGB124                       | WP_053631601.1 | WP_053687225.1 |
| <i>Streptomyces</i> sp. NRRL                         | WP_033022242.1 | WP_053699786.1 |
| <i>Streptomyces</i> sp. NRRL                         | WP_053700555.1 | WP_053700554.1 |
| <i>Streptomyces</i> sp. NRRL                         | WP_030342513.1 | WP_053708057.1 |
| <i>Saccharothrix</i> sp. NRRL                        | WP_053715019.1 | WP_053715018.1 |
| <i>Streptomyces</i> sp. WM6378                       | WP_053726116.1 | WP_053726117.1 |
| <i>Nocardia</i> sp. NRRL                             | WP_053735788.1 | WP_053735789.1 |
| <i>Nocardia</i> sp. NRRL                             | WP_053737651.1 | WP_053737650.1 |
| <i>Streptomyces</i> sp. NRRL                         | WP_053742204.1 | WP_053742205.1 |
| <i>Streptomyces</i> sp. NRRL                         | WP_053744419.1 | WP_053744418.1 |
| <i>Streptomyces</i> sp. MMG1533                      | WP_199830644.1 | WP_053751140.1 |
| <i>Streptomyces</i> sp. MMG1533                      | WP_053755072.1 | WP_053755073.1 |
| <i>Streptomyces</i> sp. AS58                         | WP_053757888.1 | WP_053757887.1 |
| <i>Streptomyces</i> sp. KS                           | WP_053789482.1 | WP_053789481.1 |
| <i>Streptomyces rimosus</i> subsp.                   | WP_032920569.1 | WP_053804336.1 |
| <i>Streptomyces</i> sp. NRRL                         | WP_053847565.1 | WP_053847566.1 |
| <i>Streptomyces</i> sp. NRRL                         | WP_053847746.1 | WP_053847745.1 |
| <i>Streptomyces</i> sp. TP-A0875                     | WP_030420249.1 | WP_053912976.1 |
| <i>Streptomyces chattanoogaensis</i>                 | WP_053921786.1 | WP_053921787.1 |

|                                                   |                |                |
|---------------------------------------------------|----------------|----------------|
| <i>Streptomyces chattanoogensis</i>               | WP_053926095.1 | WP_053926096.1 |
| <i>Streptomyces mutomycini</i>                    | WP_031095948.1 | WP_053930101.1 |
| <i>Alloactinosynnema</i> sp. L-07                 | WP_054044438.1 | WP_054044441.1 |
| <i>Streptomyces</i> sp. RLA2-12                   | WP_211179941.1 | WP_054237211.1 |
| <i>Kibdelosporangium phytohabitans</i> strain=DSM | WP_054292818.1 | WP_054292817.1 |
| <i>Frankia</i> sp. R43                            | WP_054566348.1 | WP_054566347.1 |
| <i>Streptomyces milbemycinicus</i>                | WP_086859600.1 | WP_055414292.1 |
| <i>Streptomyces pactum</i> strain=ACT12           | WP_055417860.1 | WP_055417861.1 |
| <i>Streptomyces pactum</i> strain=ACT12           | WP_055422251.1 | WP_055422252.1 |
| <i>Streptomyces</i> sp. NBRC                      | WP_031082067.1 | WP_055468989.1 |
| <i>Streptomyces pathocidini</i>                   | WP_055471408.1 | WP_055471409.1 |
| <i>Streptomyces</i> sp. TP-A0356                  | WP_055490538.1 | WP_055490537.1 |
| <i>Nonomurea pusilla</i> strain=DSM               | WP_055510056.1 | WP_055510058.1 |
| <i>Streptomyces ossamyceticus</i>                 | WP_055521571.1 | WP_055521570.1 |
| <i>Streptomyces ossamyceticus</i> strain=SAI-001  | WP_055522074.1 | WP_055522075.1 |
| <i>Streptomyces graminilatus</i>                  | WP_055525529.1 | WP_055525528.1 |
| <i>Streptomyces graminilatus</i>                  | WP_055530720.1 | WP_055530723.1 |
| <i>Streptomyces neyagawaensis</i>                 | WP_055537377.1 | WP_055537376.1 |
| <i>Streptomyces neyagawaensis</i>                 | WP_240501046.1 | WP_055537422.1 |
| <i>Streptomyces neyagawaensis</i>                 | WP_157873121.1 | WP_055538441.1 |
| <i>Streptomyces kanamyceticus</i>                 | WP_055544267.1 | WP_055544268.1 |
| <i>Streptomyces kanamyceticus</i>                 | WP_055549691.1 | WP_055549689.1 |
| <i>Streptomyces kanamyceticus</i>                 | WP_055554168.1 | WP_055554166.1 |
| <i>Streptomyces atriruber</i>                     | WP_055568763.1 | WP_055568762.1 |
| <i>Streptomyces prasinopilosus</i>                | WP_055573178.1 | WP_055573179.1 |
| <i>Streptomyces hirsutus</i>                      | WP_055593196.1 | WP_055593195.1 |
| <i>Streptomyces hirsutus</i>                      | WP_055593898.1 | WP_055593899.1 |
| <i>Streptomyces aureus</i> strain=NRRL            | WP_055602213.1 | WP_055602212.1 |
| <i>Streptomyces prasinus</i> strain=ATCC          | WP_055605500.1 | WP_055605501.1 |
| <i>Streptomyces phaeochromogenes</i>              | WP_055613727.1 | WP_055613726.1 |
| <i>Streptomyces</i> sp. JHA19                     | WP_055624624.1 | WP_055624623.1 |
| <i>Streptomyces</i> sp. JHA19                     | WP_055624995.1 | WP_055624994.1 |
| <i>Streptomyces hirsutus</i> strain=NRRL          | WP_055627791.1 | WP_055627792.1 |
| <i>Streptomyces hirsutus</i> strain=NRRL          | WP_055631026.1 | WP_055631025.1 |
| <i>Streptomyces griseoruber</i>                   | WP_055637369.1 | WP_055637368.1 |
| <i>Streptomyces griseoruber</i>                   | WP_055637473.1 | WP_055637472.1 |
| <i>Streptomyces gardneri</i>                      | WP_055643854.1 | WP_055643855.1 |
| <i>Streptomyces gardneri</i>                      | WP_055645220.1 | WP_055645219.1 |
| <i>Streptomyces prasinus</i>                      | WP_055691196.1 | WP_055691197.1 |
| <i>Streptomyces prasinopilosus</i> strain=NRRL    | WP_055573178.1 | WP_055695347.1 |
| <i>Streptomyces silaceus</i>                      | WP_055697661.1 | WP_055697662.1 |
| <i>Streptomyces torulosus</i>                     | WP_055522074.1 | WP_055711344.1 |
| <i>Streptomyces torulosus</i>                     | WP_055712865.1 | WP_055712864.1 |
| <i>Streptomyces niveiscabiei</i>                  | WP_206191172.1 | WP_055719628.1 |
| <i>Streptomyces</i> sp. V2                        | WP_109361111.1 | WP_055720667.1 |
| <i>Streptomyces niveiscabiei</i>                  | WP_055720945.1 | WP_055720944.1 |
| <i>Streptomyces</i> sp. V2                        | WP_055723264.1 | WP_055723265.1 |
| <i>Streptomyces</i> sp. Root66D1                  | WP_056556847.1 | WP_056556843.1 |
| <i>Streptomyces</i> sp. Root66D1                  | WP_056568706.1 | WP_056568709.1 |
| <i>Streptomyces</i> sp. Root431                   | WP_056639676.1 | WP_056639673.1 |
| <i>Streptomyces</i> sp. Tu10                      | WP_214299761.1 | WP_056698536.1 |
| <i>Streptomyces</i> sp. ADI97-07                  | WP_124283265.1 | WP_056787794.1 |
| <i>Streptomyces clavifer</i>                      | WP_056794282.1 | WP_056794284.1 |
| <i>Nocardia</i> sp. Root136                       | WP_056819518.1 | WP_056819519.1 |
| <i>Kitasatospora</i> sp. Root187                  | WP_057231757.1 | WP_057231755.1 |
| <i>Streptomyces</i> sp. Root264                   | WP_057577768.1 | WP_057577767.1 |
| <i>Streptomyces</i> sp. Root264                   | WP_057580839.1 | WP_057580841.1 |
| <i>Streptomyces</i> sp. Root1310                  | WP_057605536.1 | WP_057605534.1 |
| <i>Streptomyces</i> sp. Root369                   | WP_057608895.1 | WP_057608896.1 |
| <i>Streptomyces</i> sp. Root369                   | WP_057613879.1 | WP_057613878.1 |
| <i>Streptomyces hygrosopicus</i> subsp.           | WP_058080278.1 | WP_058080277.1 |
| <i>Photorhabdus laumondii</i> subsp.              | WP_011148295.1 | WP_058589266.1 |
| <i>Nocardia jinanensis</i>                        | WP_058854634.1 | WP_058854635.1 |
| <i>Streptomyces</i> sp. CdTB01                    | WP_058920528.1 | WP_058920527.1 |
| <i>Streptomyces</i> sp. CdTB01                    | WP_058923456.1 | WP_058923457.1 |
| <i>Streptomyces specialis</i>                     | WP_059008591.1 | WP_059008590.1 |
| <i>Streptomyces acidiscabies</i>                  | WP_050375860.1 | WP_059043403.1 |
| <i>Streptomyces acidiscabies</i>                  | WP_010353751.1 | WP_059043575.1 |
| <i>Streptomyces acidiscabies</i> strain=a10       | WP_059044563.1 | WP_059044489.1 |
| <i>Streptomyces scabiei</i> strain=S58            | WP_059083439.1 | WP_059083438.1 |
| <i>Streptomyces</i> sp. 3212.3                    | WP_059126997.1 | WP_059126998.1 |
| <i>Streptomyces</i> sp. 3212.3                    | WP_059130314.1 | WP_059130315.1 |
| <i>Streptomyces</i> sp. WAC05858                  | WP_059141951.1 | WP_059141950.1 |
| <i>Streptomyces antibioticus</i>                  | WP_059193539.1 | WP_059193538.1 |
| <i>Streptomyces canus</i>                         | WP_057613879.1 | WP_059205882.1 |
| <i>Streptomyces canus</i>                         | WP_059208347.1 | WP_059208346.1 |

|                                              |                |                |
|----------------------------------------------|----------------|----------------|
| Streptomyces sp. FBKL.4005                   | WP_059247726.1 | WP_059247725.1 |
| Streptomyces sp. FBKL.4005                   | WP_094374188.1 | WP_059248942.1 |
| Streptomyces corchorusii                     | WP_059263828.1 | WP_059263829.1 |
| Streptomyces canus strain=C-509              | WP_059301433.1 | WP_059301432.1 |
| Streptomyces azureus                         | WP_059417155.1 | WP_059417154.1 |
| Streptomyces azureus                         | WP_059417167.1 | WP_059417168.1 |
| Streptomyces azureus                         | WP_059418084.1 | WP_059418083.1 |
| Streptomyces sp. fd1-xmd                     | WP_078093526.1 | WP_060179670.1 |
| Pseudonocardia sp. EC080619-01               | WP_060577482.1 | WP_060577272.1 |
| Streptomyces albus subsp.                    | WP_060731423.1 | WP_060731351.1 |
| Streptomyces sp. OK228                       | WP_097287362.1 | WP_060895971.1 |
| Streptomyces scabiei strain=96-08            | WP_037723186.1 | WP_060906657.1 |
| Streptomyces hygrosopicus subsp.             | WP_060944228.1 | WP_060944227.1 |
| Streptomyces hygrosopicus                    | WP_079106283.1 | WP_060949427.1 |
| Streptomyces sp. NBRC                        | WP_060952888.1 | WP_060952889.1 |
| Nocardiopsis alborubida                      | WP_061080669.1 | WP_061080670.1 |
| Nocardiopsis alborubida                      | WP_061082460.1 | WP_061082459.1 |
| Streptomyces sp. CCM                         | WP_061442547.1 | WP_061442548.1 |
| Streptomyces sp. CCM                         | WP_061443597.1 | WP_061443598.1 |
| Streptomyces bungoensis                      | WP_061918568.1 | WP_061918570.1 |
| Streptomyces bungoensis                      | WP_061928196.1 | WP_061928195.1 |
| Streptomyces hygrosopicus subsp.             | WP_079079671.1 | WP_062008684.1 |
| Streptomyces griseorubiginosus strain=DSM    | WP_062025897.1 | WP_062025896.1 |
| Streptomyces griseorubiginosus strain=DSM    | WP_062026311.1 | WP_062026310.1 |
| Streptomyces canus strain=DSM                | WP_062037427.1 | WP_062037430.1 |
| Streptomyces canus strain=DSM                | WP_062040607.1 | WP_062040610.1 |
| Streptomyces sp. CC71                        | WP_062134916.1 | WP_062134919.1 |
| Streptomyces curacoi                         | WP_062155423.1 | WP_062155425.1 |
| Streptomyces griseorubiginosus               | WP_062240986.1 | WP_062240988.1 |
| Streptomyces sp. BK205                       | WP_132835596.1 | WP_062242513.1 |
| Streptomyces sp. NBRC                        | WP_062646379.1 | WP_062646378.1 |
| Streptomyces sp. NRRL                        | WP_062667750.1 | WP_062667752.1 |
| Streptomyces sp. NRRL                        | WP_062674197.1 | WP_062674195.1 |
| Streptomyces regalis                         | WP_062705533.1 | WP_062705535.1 |
| Streptomyces regalis                         | WP_167364436.1 | WP_062705836.1 |
| Streptomyces regalis                         | WP_062715242.1 | WP_062715240.1 |
| Streptomyces caeruleatus                     | WP_062717647.1 | WP_062717646.1 |
| Streptomyces caeruleatus                     | WP_167366201.1 | WP_062718364.1 |
| Streptomyces cinereoruber subsp.             | WP_062751469.1 | WP_062751470.1 |
| Streptomyces sp. WAC00288                    | WP_062757676.1 | WP_062757674.1 |
| Streptomyces qaidamensis                     | WP_062929168.1 | WP_062929167.1 |
| Nocardia africana strain=NCTC13184           | WP_062966924.1 | WP_062966926.1 |
| Nocardia anaemiae                            | WP_062985829.1 | WP_062985831.1 |
| Nocardia mikamii                             | WP_063002435.1 | WP_063002434.1 |
| Nocardia kruczakiae                          | WP_063008750.1 | WP_063008751.1 |
| Nocardia nova strain=ATCC                    | WP_104407661.1 | WP_063012014.1 |
| Nocardia nova strain=ATCC                    | WP_063012016.1 | WP_063025877.1 |
| Amycolatopsis keratiniphila subsp.           | WP_143253861.1 | WP_063276278.1 |
| Streptomyces sp. MJM8645                     | WP_244293576.1 | WP_063346343.1 |
| Streptomyces sp. MJM8645                     | WP_063350295.1 | WP_063350294.1 |
| Pseudoalteromonas luteoviolacea DSM          | WP_063358305.1 | WP_063358306.1 |
| Pseudoalteromonas luteoviolacea S2607        | WP_063371363.1 | WP_063371364.1 |
| Pseudoalteromonas luteoviolacea strain=NCIMB | WP_063379107.1 | WP_063379106.1 |
| Pseudoalteromonas luteoviolacea S4060-1      | WP_063381924.1 | WP_063381923.1 |
| Streptomyces ambofaciens strain=DSM          | WP_063483080.1 | WP_063483079.1 |
| Streptomyces sp. RTd22                       | WP_063730699.1 | WP_063730700.1 |
| Streptomyces sp. NRRL                        | WP_030673097.1 | WP_063761226.1 |
| Streptomyces albulus strain=B-3066           | WP_064071254.1 | WP_064071255.1 |
| Micromonospora sp. NBRC                      | WP_064445763.1 | WP_064445764.1 |
| Streptomyces sp. SAT1                        | WP_064533819.1 | WP_064533818.1 |
| Streptomyces parvulus strain=JCM             | WP_064729825.1 | WP_064729824.1 |
| Streptomyces parvulus strain=JCM             | WP_064732208.1 | WP_064732209.1 |
| Nocardia nova strain=BJ06-0156               | WP_063012016.1 | WP_064904326.1 |
| Nocardia sp. 852002-20019                    | WP_063012016.1 | WP_064909732.1 |
| Nocardia sp. 852002-51101                    | WP_063012016.1 | WP_064927099.1 |
| Streptomyces sp. H-KF8                       | WP_065002515.1 | WP_065002516.1 |
| Delftia sp. JD2                              | WP_047219561.1 | WP_065346697.1 |
| Photorhabdus namnaonensis                    | WP_082302633.1 | WP_065391619.1 |
| Acidithiobacillus ferrivorans strain=YL15    | WP_065414055.1 | WP_065414054.1 |
| Streptomyces sp. PTY08712                    | WP_065482189.1 | WP_065482186.1 |
| Lentzea guizhouensis                         | WP_065913515.1 | WP_065913514.1 |
| Streptomyces sparsogenes DSM                 | WP_065965817.1 | WP_065965816.1 |
| Streptomyces hygrosopicus                    | WP_066028102.1 | WP_066028101.1 |
| Candidatus Desulfofervidus auxilii           | WP_066062736.1 | WP_066062739.1 |
| Streptomyces thermoautotrophicus strain=HI1  | WP_066890293.1 | WP_066890288.1 |
| Streptomyces sp. NBRC                        | WP_066927529.1 | WP_066927527.1 |

|                                           |                |                |
|-------------------------------------------|----------------|----------------|
| Streptomyces sp. NBRC                     | WP_066939262.1 | WP_066939265.1 |
| Microtetraspora fusca                     | WP_066941725.1 | WP_066941498.1 |
| Streptomyces lushanensis                  | WP_066948014.1 | WP_066947978.1 |
| Streptomyces sp. NRRL                     | WP_066988336.1 | WP_066988337.1 |
| Streptomyces cellostaticus                | WP_067005143.1 | WP_067005141.1 |
| Streptomyces cellostaticus                | WP_067010752.1 | WP_067010750.1 |
| Streptomyces dysideae                     | WP_067021570.1 | WP_067021572.1 |
| Streptomyces dysideae                     | WP_067029502.1 | WP_067029504.1 |
| Streptomyces dysideae                     | WP_067033417.1 | WP_067033419.1 |
| Streptomyces sp. ERV7                     | WP_158942597.1 | WP_067162616.1 |
| Streptomyces longwoodensis                | WP_067233052.1 | WP_067233050.1 |
| Streptomyces sp. DSM                      | WP_234359949.1 | WP_067244867.1 |
| Streptomyces sp. DSM                      | WP_067246164.1 | WP_067247659.1 |
| Streptomyces jeddahensis                  | WP_067283720.1 | WP_067283724.1 |
| Streptomyces jeddahensis                  | WP_067284954.1 | WP_067284953.1 |
| Micromonospora rifamycinica               | WP_067303674.1 | WP_067303671.1 |
| Micromonospora rifamycinica               | WP_067308427.1 | WP_067308454.1 |
| Streptomyces griseochromogenes strain=DSM | WP_067316072.1 | WP_067316070.1 |
| Streptomyces griseochromogenes strain=DSM | WP_067316333.1 | WP_067316331.1 |
| Micromonospora rosaria                    | WP_067359461.1 | WP_067359411.1 |
| Streptomyces mirabilis strain=P16B-1      | WP_168498362.1 | WP_067361020.1 |
| Micromonospora rosaria                    | WP_067372613.1 | WP_067372610.1 |
| Streptomyces olivochromogenes             | WP_067384735.1 | WP_067384739.1 |
| Streptomyces thermovulgaris               | WP_086793185.1 | WP_067397763.1 |
| Streptomyces thermovulgaris               | WP_236561229.1 | WP_067398924.1 |
| Streptomyces sampsonii strain=KJ40        | WP_067409957.1 | WP_067409955.1 |
| Streptomyces lincolnensis strain=B48      | WP_067442581.1 | WP_067442579.1 |
| Nocardia alba                             | WP_067445795.1 | WP_067445793.1 |
| Actinomadura macra                        | WP_067452422.1 | WP_067452420.1 |
| Nocardia alba                             | WP_132370335.1 | WP_067458168.1 |
| Nocardia amamiensis                       | WP_067462446.1 | WP_067462449.1 |
| Actinomadura hibisca                      | WP_067491182.1 | WP_067491180.1 |
| Actinoplanes sp. TFC3                     | WP_067499173.1 | WP_067499172.1 |
| Nocardia terpenica strain=IFM             | WP_067582824.1 | WP_067582827.1 |
| Nocardia terpenica strain=IFM             | WP_067592170.1 | WP_067592167.1 |
| Actinoplanes awajinensis subsp.           | WP_269748325.1 | WP_067687395.1 |
| Nocardia yamanashiensis                   | WP_169815307.1 | WP_067708357.1 |
| Actinomadura formosensis                  | WP_067794013.1 | WP_067794014.1 |
| Nocardia beijingensis                     | WP_067798236.1 | WP_067798240.1 |
| Actinomadura kijaniata                    | WP_067813794.1 | WP_067813796.1 |
| Actinomadura chibensis                    | WP_067900683.1 | WP_067900687.1 |
| Actinomadura rubrobrunea                  | WP_067915615.1 | WP_067915614.1 |
| Nocardiopsis trehalosi                    | WP_067975235.1 | WP_067975238.1 |
| Nocardia mexicana                         | WP_068014611.1 | WP_068014613.1 |
| Nocardia mexicana                         | WP_068025260.1 | WP_068025258.1 |
| Rhodococcus sp. EPR-157                   | WP_197480983.1 | WP_068380381.1 |
| Pseudonocardia sp. HH130630-07            | WP_068801047.1 | WP_068801048.1 |
| Micromonospora chalcea strain=LB41        | WP_069088550.1 | WP_069088551.1 |
| Streptomyces griseus strain=BIG105        | WP_069173814.1 | WP_069173813.1 |
| Streptomyces lydicus strain=103           | WP_069569204.1 | WP_069569205.1 |
| Streptomyces sp. EN27                     | WP_069739084.1 | WP_069739083.1 |
| Streptomyces sp. EN23                     | WP_069743869.1 | WP_069743870.1 |
| Streptomyces sp. EN16                     | WP_069752447.1 | WP_069752446.1 |
| Streptomyces sp. LUP47B                   | WP_069759373.1 | WP_069759374.1 |
| Streptomyces sp. LUP47B                   | WP_069764407.1 | WP_069764406.1 |
| Streptomyces sp. LUP30                    | WP_079141676.1 | WP_069768259.1 |
| Streptomyces sp. LUP30                    | WP_069772248.1 | WP_069772249.1 |
| Streptomyces sp. LUP30                    | WP_069772986.1 | WP_069772985.1 |
| Streptomyces fodineus                     | WP_069779518.1 | WP_069779519.1 |
| Streptomyces sp. TP-A0874                 | WP_069814232.1 | WP_069814231.1 |
| Actinoalloteichus hymeniacidonis          | WP_069848463.1 | WP_069848465.1 |
| Streptomyces subbrutilus strain=10-1-1    | WP_069918767.1 | WP_069918766.1 |
| Streptomyces subbrutilus strain=10-1-1    | WP_069924429.1 | WP_069924428.1 |
| Streptomyces agglomeratus strain=5-2-6    | WP_069931167.1 | WP_069931166.1 |
| Streptomyces abyssalis                    | WP_070010966.1 | WP_070010965.1 |
| Streptomyces nanshensis                   | WP_070014825.1 | WP_070014823.1 |
| Streptomyces misionensis                  | WP_070024072.1 | WP_070024070.1 |
| Frankia sp. CgIM4                         | WP_070132435.1 | WP_070132437.1 |
| Frankia sp. CgIM4                         | WP_070132702.1 | WP_070132700.1 |
| Streptomyces nanshensis strain=SCSIO      | WP_070199882.1 | WP_070199883.1 |
| Mycobacteroides saopaulense strain=8528   | WP_070910380.1 | WP_070910379.1 |
| Frankia sp. BMG5.36                       | WP_241841482.1 | WP_071046761.1 |
| Frankia sp. BMG5.36                       | WP_071052027.1 | WP_071052026.1 |
| Frankia soli                              | WP_071066914.1 | WP_071066857.1 |
| Frankia sp. Cc1.17                        | WP_131803084.1 | WP_071085077.1 |
| Streptomyces albidoflavus strain=77       | WP_067409957.1 | WP_071330692.1 |

|                                            |                |                |
|--------------------------------------------|----------------|----------------|
| Streptomyces albidoflavus strain=OsiLf-2   | WP_071337344.1 | WP_071337345.1 |
| Streptomyces colonosanans                  | WP_071364297.1 | WP_071364298.1 |
| Streptomyces monashensis                   | WP_071380424.1 | WP_071380423.1 |
| Nocardioopsis dassonvillei strain=NOCA502F | WP_013155269.1 | WP_071622845.1 |
| Streptomyces humi                          | WP_071659785.1 | WP_071659786.1 |
| Couchioplanes caeruleus strain=DSM         | WP_071802703.1 | WP_071802704.1 |
| Amycolatopsis australiensis                | WP_072478127.1 | WP_072478128.1 |
| Streptomyces atratus strain=OK807          | WP_072484345.1 | WP_072484346.1 |
| Streptomyces atratus strain=OK807          | WP_072484752.1 | WP_072484753.1 |
| Streptomyces atratus strain=OK807          | WP_072488766.1 | WP_072488765.1 |
| Phormidismis priestleyi                    | WP_073068954.1 | WP_073068955.1 |
| Streptomyces sp. NBRC                      | WP_073215232.1 | WP_073215229.1 |
| Nocardioopsis flavescens                   | WP_073374285.1 | WP_073375300.1 |
| Nocardioopsis flavescens                   | WP_073378775.1 | WP_073378774.1 |
| Geodermatophilus nigrescens                | WP_245794804.1 | WP_073422200.1 |
| Streptomyces noursei strain=JCM            | WP_102923492.1 | WP_073448207.1 |
| Streptomyces phaeoluteigriseus strain=DSM  | WP_073496213.1 | WP_073496215.1 |
| Chroogloeocystis siderophila               | WP_073549750.1 | WP_073549752.1 |
| Streptomyces sp. CB02414                   | WP_073724194.1 | WP_073724195.1 |
| Streptomyces sp. TSRI0281                  | WP_073728615.1 | WP_073728613.1 |
| Streptomyces sp. CB02488                   | WP_073737891.1 | WP_073737892.1 |
| Streptomyces sp. CB02488                   | WP_073738919.1 | WP_073738918.1 |
| Streptomyces sp. CB02115                   | WP_050357095.1 | WP_073743113.1 |
| Streptomyces sp. CB02058                   | WP_073749549.1 | WP_073749548.1 |
| Streptomyces sp. CB03234                   | WP_073759807.1 | WP_073759805.1 |
| Streptomyces sp. MJM1172                   | WP_073775776.1 | WP_073775774.1 |
| Streptomyces sp. KCTC                      | WP_008742304.1 | WP_073780068.1 |
| Streptomyces uncialis                      | WP_073784277.1 | WP_073784275.1 |
| Streptomyces sp. CB01580                   | WP_073789517.1 | WP_073789519.1 |
| Streptomyces sp. CB03578                   | WP_008742304.1 | WP_073798812.1 |
| Kitasatospora sp. CB01950                  | WP_073812888.1 | WP_073812889.1 |
| Streptomyces sp. CB02261                   | WP_073814418.1 | WP_073814416.1 |
| Kitasatospora sp. CB01950                  | WP_073815772.1 | WP_073815774.1 |
| Micromonospora sp. TSRI0369                | WP_073828438.1 | WP_073828439.1 |
| Micromonospora sp. CB01531                 | WP_073836262.1 | WP_073836263.1 |
| Streptomyces sp. CB01249                   | WP_073865378.1 | WP_073865379.1 |
| Streptomyces sp. CB01249                   | WP_018102924.1 | WP_073865476.1 |
| Streptomyces sp. CB01249                   | WP_073865800.1 | WP_073865799.1 |
| Saccharothrix sp. CB00851                  | WP_143193283.1 | WP_073892161.1 |
| Streptomyces sp. PanSC9                    | WP_073893212.1 | WP_073893209.1 |
| Streptomyces sp. CB02009                   | WP_073905106.1 | WP_073905104.1 |
| Streptomyces sp. CB00455                   | WP_073918212.1 | WP_073918210.1 |
| Streptomyces sp. CB02400                   | WP_073931335.1 | WP_073931336.1 |
| Streptomyces sp. CB02400                   | WP_073934957.1 | WP_073934958.1 |
| Streptomyces sp. TSRI0107                  | WP_073938881.1 | WP_073938882.1 |
| Streptomyces sp. TSRI0107                  | WP_073943900.1 | WP_073943901.1 |
| Streptomyces kebangsaanensis               | WP_073947344.1 | WP_073947343.1 |
| Streptomyces kebangsaanensis               | WP_073948911.1 | WP_073948910.1 |
| Streptomyces kebangsaanensis               | WP_073950879.1 | WP_073950877.1 |
| Streptomyces sp. CB02460                   | WP_073969085.1 | WP_073969086.1 |
| Streptomyces sp. CB02460                   | WP_073969204.1 | WP_073969203.1 |
| Streptomyces sp. CB02460                   | WP_073969575.1 | WP_073969574.1 |
| Micromonospora carbonacea strain=DSM       | WP_178064915.1 | WP_074473059.1 |
| Streptomyces qinglanensis                  | WP_074998190.1 | WP_074998189.1 |
| Streptomyces qinglanensis                  | WP_074999498.1 | WP_074999499.1 |
| Geodermatophilus obscurus strain=DSM       | WP_244274396.1 | WP_075015570.1 |
| Streptomyces mirabilis strain=OK461        | WP_075030274.1 | WP_075030273.1 |
| Streptomyces mirabilis strain=OK461        | WP_054237210.1 | WP_075033379.1 |
| Actinophytocola xanthii                    | WP_075125738.1 | WP_075125737.1 |
| Actinophytocola xinjiangensis              | WP_075131671.1 | WP_075131672.1 |
| Actinophytocola xinjiangensis              | WP_075137290.1 | WP_075137239.1 |
| Pseudonocardia sp. Ae717                   | WP_075334873.1 | WP_075334874.1 |
| Streptomyces acidiscabies strain=98-48     | WP_075735622.1 | WP_075735598.1 |
| Streptomyces acidiscabies strain=98-48     | WP_010359933.1 | WP_075737219.1 |
| Actinoalloteichus sp. GBA129-24            | WP_075740184.1 | WP_075740185.1 |
| Streptomyces acidiscabies                  | WP_075824540.1 | WP_075824531.1 |
| Rhodococcus sp. KRD197                     | WP_206509240.1 | WP_075838339.1 |
| Saccharomonospora sp. CUA-673              | WP_075845424.1 | WP_075845423.1 |
| Gordonia sp. CNJ-863                       | WP_084813215.1 | WP_075863512.1 |
| Actinokineospora bangkokensis              | WP_084793925.1 | WP_075974933.1 |
| Actinokineospora bangkokensis              | WP_075978765.1 | WP_075978764.1 |
| Streptomyces sp. IMTB                      | WP_076097293.1 | WP_076097295.1 |
| Paenibacillus sp. FSL                      | WP_051493803.1 | WP_076161945.1 |
| Microbispora rosea strain=ATCC             | WP_076441724.1 | WP_076441726.1 |
| Micromonospora avicenniae                  | WP_076472672.1 | WP_076472671.1 |
| Frankia sp. CcI156                         | WP_063578334.1 | WP_076804642.1 |

|                                              |                |                |
|----------------------------------------------|----------------|----------------|
| Frankia sp. CcI156                           | WP_076807833.1 | WP_076807831.1 |
| Frankia asymbiotica                          | WP_076814634.1 | WP_076814632.1 |
| Frankia sp. CcI49                            | WP_054566348.1 | WP_076834376.1 |
| Frankia sp. BMG5.30                          | WP_047223900.1 | WP_076843945.1 |
| Streptomyces sp. IB2014                      | WP_076966780.1 | WP_076966779.1 |
| Streptomyces sp. M1013                       | WP_076974590.1 | WP_076974589.1 |
| Streptomyces sp. M1013                       | WP_076976120.1 | WP_076976119.1 |
| Streptomyces sp. M1013                       | WP_076976334.1 | WP_076976333.1 |
| Actinosynnema sp. ALI-1.44                   | WP_076985337.1 | WP_076985336.1 |
| Actinosynnema sp. ALI-1.44                   | WP_076986395.1 | WP_076986396.1 |
| Actinosynnema sp. ALI-1.44                   | WP_076988639.1 | WP_076988640.1 |
| Actinosynnema sp. ALI-1.44                   | WP_076992002.1 | WP_076992003.1 |
| Saccharothrix sp. ALI-22-I                   | WP_077006628.1 | WP_077006627.1 |
| Streptomyces sp. MP131-18                    | WP_077057273.1 | WP_077057272.1 |
| Streptomyces sp. JHA26                       | WP_077796592.1 | WP_077796591.1 |
| Streptomyces sp. JHA26                       | WP_077801382.1 | WP_077801381.1 |
| Streptomyces sp. JHA26                       | WP_077801396.1 | WP_077801397.1 |
| Micromonospora sp. Rc5                       | WP_077940053.1 | WP_077940054.1 |
| Streptomyces tsukubensis strain=AT3          | WP_077963682.1 | WP_077963680.1 |
| Streptomyces tsukubensis strain=AT3          | WP_077967196.1 | WP_077967194.1 |
| Mycobacteroides salmoniphilum                | WP_078331071.1 | WP_078331072.1 |
| Mycobacteroides salmoniphilum strain=CCUG    | WP_078287962.1 | WP_078361898.1 |
| Streptomyces monomycini                      | WP_030017831.1 | WP_078623966.1 |
| Streptomyces antibioticus strain=DSM         | WP_030786368.1 | WP_078632698.1 |
| Streptomyces antibioticus strain=DSM         | WP_030785031.1 | WP_078633842.1 |
| Streptomyces hygroscopicus strain=XM201      | WP_078640274.1 | WP_078647271.1 |
| Marinactinospora thermotolerans              | WP_078760759.1 | WP_078760758.1 |
| Streptomyces sp. NRRL                        | WP_030744951.1 | WP_078854392.1 |
| Streptomyces sp. SGAir0924                   | WP_046249270.1 | WP_078855271.1 |
| Streptomyces sp. Osf17                       | WP_019326887.1 | WP_078855578.1 |
| Streptomyces caatingaensis                   | WP_049718467.1 | WP_078871539.1 |
| Streptomyces sp. NRRL                        | WP_030874476.1 | WP_078872695.1 |
| Streptomyces sp. NRRL                        | WP_031022574.1 | WP_078912212.1 |
| Embleya scabrispora strain=NF3               | WP_078975343.1 | WP_078975342.1 |
| Embleya scabrispora strain=NF3               | WP_078981475.1 | WP_078981474.1 |
| Streptomyces sp. WM6372                      | WP_053692530.1 | WP_078988640.1 |
| Streptomyces ambofaciens                     | WP_053125893.1 | WP_079029946.1 |
| Streptomyces prasinopilosus                  | WP_055571856.1 | WP_079039717.1 |
| Streptomyces thermoautotrophicus strain=UBT1 | WP_067068863.1 | WP_079046114.1 |
| Streptomyces puniscabiei                     | WP_055705675.1 | WP_079048716.1 |
| Streptomyces yokosukanensis                  | WP_067133488.1 | WP_079071718.1 |
| Streptomyces prasinopilosus strain=NRRL      | WP_055693209.1 | WP_079104816.1 |
| Streptomyces sp. CC71                        | WP_031022574.1 | WP_079126812.1 |
| Streptomyces ambofaciens strain=DSM          | WP_063480893.1 | WP_079155320.1 |
| Streptomyces sp. CB02009                     | WP_073904102.1 | WP_079188282.1 |
| Streptomyces antioxidans                     | WP_240529221.1 | WP_079343856.1 |
| Streptomyces sp. Ag109                       | WP_079432362.1 | WP_079432361.1 |
| Streptomyces sp. Ag109                       | WP_079432341.1 | WP_079432411.1 |
| Streptomyces sp. 3214.6                      | WP_231976244.1 | WP_079657760.1 |
| Streptomyces sp. 3214.6                      | WP_079659606.1 | WP_079659604.1 |
| Streptomyces sp. 3214.6                      | WP_079663810.1 | WP_079663811.1 |
| Saccharomonospora piscinae strain=LRS4.154   | WP_081190237.1 | WP_081190533.1 |
| Streptomyces sp. M41                         | WP_081220469.1 | WP_081220470.1 |
| Streptomyces viridosporus                    | WP_081239924.1 | WP_081239925.1 |
| Streptomyces sp. Sge12                       | WP_053174054.1 | WP_081524509.1 |
| Propionibacterium acidifaciens DSM           | WP_021796846.1 | WP_081660474.1 |
| Streptacidiphilus jiangxiensis               | WP_042441868.1 | WP_082014654.1 |
| Tsukamurella pulmonis                        | WP_269451335.1 | WP_082756879.1 |
| Dietzia timorensis strain=ID05-A0528         | WP_082908487.1 | WP_082908486.1 |
| Mycobacteroides saopaulense strain=CCUG      | WP_083017079.1 | WP_083017081.1 |
| Streptomyces gilvosporeus                    | WP_083108816.1 | WP_083108817.1 |
| Kitasatospora albolonga                      | WP_084751608.1 | WP_084751611.1 |
| Streptomyces sp. CB03238                     | WP_084902849.1 | WP_084902967.1 |
| Streptomyces sp. CB03238                     | WP_084903485.1 | WP_084903488.1 |
| Thermoactinospora rubra                      | WP_084963796.1 | WP_084963797.1 |
| Frankia casuarinae strain=Cg70.9             | WP_085002875.1 | WP_085002874.1 |
| Frankia sp. KB5                              | WP_085016129.1 | WP_085016130.1 |
| Streptomyces sp. Amel2xC10                   | WP_085209679.1 | WP_085209680.1 |
| Streptomyces sp. Amel2xC10                   | WP_085210490.1 | WP_085210493.1 |
| Streptomyces sp. Amel2xC10                   | WP_085213169.1 | WP_085213167.1 |
| Streptomyces sp. 13-12-16                    | WP_085572938.1 | WP_085572937.1 |
| Streptomyces glebosus strain=JCM             | WP_085923414.1 | WP_085923413.1 |
| Streptomyces platensis                       | WP_085926831.1 | WP_085926832.1 |
| Streptomyces africanus                       | WP_086564502.1 | WP_086564503.1 |
| Streptomyces griseocarneus strain=KCC        | WP_086567723.1 | WP_086567721.1 |
| Streptosporangium minutum                    | WP_086575008.1 | WP_086575006.1 |

|                                                      |                |                |
|------------------------------------------------------|----------------|----------------|
| <i>Streptomyces swartbergensis</i>                   | WP_086599041.1 | WP_086599040.1 |
| <i>Streptomyces swartbergensis</i>                   | WP_086601886.1 | WP_086601887.1 |
| <i>Lentzea kentuckyensis</i>                         | WP_086665222.1 | WP_086665223.1 |
| <i>Amycolatopsis pretoriensis</i>                    | WP_086670573.1 | WP_086670571.1 |
| <i>Amycolatopsis pretoriensis</i>                    | WP_086672727.1 | WP_086672725.1 |
| <i>Streptomyces</i> sp. S-9                          | WP_006134517.1 | WP_086684531.1 |
| <i>Streptomyces recifensis</i>                       | WP_086694999.1 | WP_086695000.1 |
| <i>Streptomyces tricolor</i>                         | WP_086697814.1 | WP_086697815.1 |
| <i>Streptomyces variabilis</i>                       | WP_189363632.1 | WP_086700968.1 |
| <i>Streptomyces</i> sp. PAM3C                        | WP_048456510.1 | WP_086705190.1 |
| <i>Streptomyces angustmyceticus</i>                  | WP_086717501.1 | WP_086717502.1 |
| <i>Streptomyces angustmyceticus</i>                  | WP_086719605.1 | WP_086719606.1 |
| <i>Streptomyces carpinensis</i>                      | WP_086725662.1 | WP_086725661.1 |
| <i>Streptomyces glaucescens</i>                      | WP_086733037.1 | WP_086733038.1 |
| <i>Streptomyces glaucescens</i>                      | WP_169731582.1 | WP_086741425.1 |
| <i>Streptomyces brasiliiscabiei</i> strain=IBSBF     | WP_086752286.1 | WP_086752285.1 |
| <i>Streptomyces galilaeus</i> strain=JCM             | WP_150473373.1 | WP_086767588.1 |
| <i>Streptomyces bobili</i>                           | WP_086768531.1 | WP_086768529.1 |
| <i>Streptomyces</i> sp. SID6137                      | WP_085565362.1 | WP_086805943.1 |
| <i>Streptomyces cacaoi</i> strain=DSM                | WP_212767218.1 | WP_086818425.1 |
| <i>Streptomyces</i> sp. NRRL                         | WP_041131687.1 | WP_086821982.1 |
| <i>Streptomyces</i> sp. NRRL                         | WP_086830456.1 | WP_086830455.1 |
| <i>Amycolatopsis kentuckyensis</i>                   | WP_086840976.1 | WP_086840974.1 |
| <i>Streptomyces viridochromogenes</i> strain=NRRL    | WP_086866000.1 | WP_086866001.1 |
| <i>Streptomyces viridochromogenes</i> strain=NRRL    | WP_086866092.1 | WP_086866091.1 |
| <i>Streptomyces cangkringensis</i> strain=DSM        | WP_167442331.1 | WP_086879605.1 |
| <i>Streptomyces</i> sp. CS159                        | WP_087789537.1 | WP_087789538.1 |
| <i>Streptomyces</i> sp. CS159                        | WP_087790738.1 | WP_087790737.1 |
| <i>Streptomyces</i> sp. CS159                        | WP_007389922.1 | WP_087793153.1 |
| <i>Streptomyces</i> sp. CS113                        | WP_087806871.1 | WP_087806870.1 |
| <i>Streptomyces</i> sp. CS113                        | WP_087807240.1 | WP_087807241.1 |
| <i>Streptomyces albireticuli</i> strain=MDJK11       | WP_087924979.1 | WP_087924980.1 |
| <i>Streptomyces albireticuli</i> strain=MDJK11       | WP_087929393.1 | WP_087929394.1 |
| <i>Photorhabdus luminescens</i> subsp.               | WP_088373856.1 | WP_088373855.1 |
| <i>Micromonospora wenchangensis</i>                  | WP_088642267.1 | WP_088642266.1 |
| <i>Micromonospora wenchangensis</i>                  | WP_088647535.1 | WP_088647534.1 |
| <i>Streptomyces</i> sp. 2114.4                       | WP_088796353.1 | WP_088796350.1 |
| <i>Micromonospora zamorensis</i>                     | WP_088948354.1 | WP_088951776.1 |
| <i>Micromonospora purpureochromogenes</i> strain=DSM | WP_172894301.1 | WP_088961753.1 |
| <i>Micromonospora purpureochromogenes</i> strain=DSM | WP_088961663.1 | WP_088964572.1 |
| <i>Micromonospora siamensis</i>                      | WP_088971805.1 | WP_088971804.1 |
| <i>Micromonospora coxensis</i>                       | WP_088974809.1 | WP_088974808.1 |
| <i>Micromonospora echinospira</i>                    | WP_088984230.1 | WP_088984229.1 |
| <i>Micromonospora echinospira</i>                    | WP_088985096.1 | WP_088985097.1 |
| <i>Micromonospora chokoriensis</i>                   | WP_088988926.1 | WP_088988927.1 |
| <i>Micromonospora chokoriensis</i>                   | WP_088989434.1 | WP_088989435.1 |
| <i>Micromonospora echinaurantiaca</i>                | WP_088994003.1 | WP_088994002.1 |
| <i>Micromonospora echinofusca</i>                    | WP_088999964.1 | WP_088999965.1 |
| <i>Micromonospora viridifaciens</i>                  | WP_089008024.1 | WP_089008023.1 |
| <i>Micromonospora inositola</i>                      | WP_089013913.1 | WP_089013914.1 |
| <i>Micromonospora coriariae</i>                      | WP_089020793.1 | WP_089020794.1 |
| <i>Streptomyces hyaluromycini</i>                    | WP_150134227.1 | WP_089101201.1 |
| <i>Streptomyces hyaluromycini</i>                    | WP_089107660.1 | WP_089107661.1 |
| <i>Micromonospora</i> sp. NBS                        | WP_089154218.1 | WP_089154217.1 |
| <i>Rhodococcus kyotonensis</i>                       | WP_089250814.1 | WP_089250816.1 |
| <i>Asanoa hainanensis</i>                            | WP_089251876.1 | WP_089251874.1 |
| <i>Geodermatophilus pulveris</i>                     | WP_245821126.1 | WP_089305776.1 |
| <i>Actinomadura mexicana</i>                         | WP_089311843.1 | WP_089311844.1 |
| <i>Actinomadura mexicana</i>                         | WP_089314644.1 | WP_089314773.1 |
| <i>Geodermatophilus saharensis</i>                   | WP_089405513.1 | WP_089405330.1 |
| <i>Streptomyces</i> sp. NBS                          | WP_089509018.1 | WP_089509017.1 |
| <i>Streptomyces</i> sp. NBS                          | WP_089512944.1 | WP_089512945.1 |
| <i>Lentzea albida</i>                                | WP_089922472.1 | WP_089922473.1 |
| <i>Lentzea xinjiangensis</i>                         | WP_089950895.1 | WP_089950896.1 |
| <i>Lentzea xinjiangensis</i>                         | WP_089956976.1 | WP_089956974.1 |
| <i>Lentzea albidocapillata</i> subsp.                | WP_090009138.1 | WP_090009136.1 |
| <i>Lentzea fradiae</i>                               | WP_090045589.1 | WP_090045588.1 |
| <i>Lentzea fradiae</i>                               | WP_090059926.1 | WP_090059928.1 |
| <i>Lentzea jiangxiensis</i>                          | WP_090100733.1 | WP_090100735.1 |
| <i>Micromonospora marina</i>                         | WP_091042831.1 | WP_091042834.1 |
| <i>Micromonospora marina</i>                         | WP_091049122.1 | WP_091049119.1 |
| <i>Micromonospora humi</i>                           | WP_091056021.1 | WP_091056024.1 |
| <i>Micromonospora citrea</i>                         | WP_091095206.1 | WP_091095204.1 |
| <i>Geodermatophilus dictyosporus</i>                 | WP_244524299.1 | WP_091113448.1 |
| <i>Micromonospora eburnea</i>                        | WP_091118126.1 | WP_091118127.1 |
| <i>Geodermatophilus africanus</i>                    | WP_091158100.1 | WP_091158102.1 |

|                                            |                |                |
|--------------------------------------------|----------------|----------------|
| Micromonospora narathiwatensis             | WP_091192504.1 | WP_091192506.1 |
| Micromonospora matsumotoense               | WP_141723169.1 | WP_091250258.1 |
| Micromonospora chaiyaphumensis             | WP_091258826.1 | WP_091258824.1 |
| Frankia sp. CH37                           | WP_226931902.1 | WP_091283392.1 |
| Amycolatopsis xylanica                     | WP_143047009.1 | WP_091287568.1 |
| Micromonospora halophytica                 | WP_091293378.1 | WP_091293376.1 |
| Amycolatopsis xylanica                     | WP_091297629.1 | WP_091297626.1 |
| Amycolatopsis xylanica                     | WP_245757699.1 | WP_091298216.1 |
| Micromonospora halophytica                 | WP_091298406.1 | WP_091298409.1 |
| Micromonospora chersina                    | WP_091305841.1 | WP_091305844.1 |
| Micromonospora aurantiaca strain=DSM       | WP_013286647.1 | WP_091327386.1 |
| Micromonospora aurantiaca strain=DSM       | WP_047892979.1 | WP_091331605.1 |
| Geodermatophilus telluris                  | WP_245692583.1 | WP_091368510.1 |
| Micromonospora saelicesensis               | WP_091394937.1 | WP_091394934.1 |
| Micromonospora tulbaghiaie                 | WP_091417730.1 | WP_091417737.1 |
| Micromonospora yangpuensis                 | WP_091436053.1 | WP_091436055.1 |
| Micromonospora yangpuensis                 | WP_091438698.1 | WP_091438695.1 |
| Actinokineospora iranica                   | WP_175482876.1 | WP_091451475.1 |
| Micromonospora inyonensis                  | WP_091462051.1 | WP_091462048.1 |
| Micromonospora inyonensis                  | WP_232625125.1 | WP_091462877.1 |
| Micromonospora sedimnicola                 | WP_091573943.1 | WP_091573944.1 |
| Micromonospora sedimnicola                 | WP_091574137.1 | WP_091574138.1 |
| Micromonospora krabiensis                  | WP_091589011.1 | WP_091589010.1 |
| Micromonospora mirobrigensis               | WP_091605592.1 | WP_091607008.1 |
| Micromonospora peucetia                    | WP_091630575.1 | WP_091630576.1 |
| Micromonospora pallida                     | WP_091641740.1 | WP_091641736.1 |
| Micromonospora pallida                     | WP_245730673.1 | WP_091645126.1 |
| Micromonospora auratinigra                 | WP_091660957.1 | WP_091660953.1 |
| Micromonospora auratinigra                 | WP_157740289.1 | WP_091661644.1 |
| Prauserella marina strain=CGMCC            | WP_091800463.1 | WP_091800460.1 |
| Blastococcus endophyticus                  | WP_091948740.1 | WP_091948737.1 |
| Micromonospora phaseoli                    | WP_092380119.1 | WP_092380395.1 |
| Amycolatopsis arida                        | WP_092535592.1 | WP_092535589.1 |
| Actinoplanes derwentensis                  | WP_092554644.1 | WP_092554646.1 |
| Actinopolyspora mزابensis                  | WP_092627511.1 | WP_092627510.1 |
| Quadrisphaera sp. DSM                      | WP_143028719.1 | WP_092861287.1 |
| Saccharopolyspora antimicrobica strain=CPC | WP_093156778.1 | WP_093156777.1 |
| Thermostaphylospora chromogena             | WP_093257256.1 | WP_093257257.1 |
| Saccharopolyspora shandongensis            | WP_093260295.1 | WP_093260293.1 |
| Saccharopolyspora shandongensis            | WP_093260318.1 | WP_093260316.1 |
| Thermostaphylospora chromogena             | WP_093262519.1 | WP_093262518.1 |
| Micromonospora sediminimaris               | WP_093402662.1 | WP_093402663.1 |
| Streptomyces sp. 2114.2                    | WP_003973891.1 | WP_093456931.1 |
| Streptomyces sp. 2114.2                    | WP_003973654.1 | WP_093456994.1 |
| Streptomyces melanosporofaciens            | WP_093465610.1 | WP_093470579.1 |
| Streptomyces sp. 1222.5                    | WP_093471999.1 | WP_093472001.1 |
| Streptomyces sp. 1222.5                    | WP_093478210.1 | WP_093478212.1 |
| Streptomyces sp. 2323.1                    | WP_093481892.1 | WP_093481891.1 |
| Streptomyces sp. 2112.2                    | WP_093486102.1 | WP_093486104.1 |
| Streptomyces sp. Ag109                     | WP_093497982.1 | WP_093497983.1 |
| Streptomyces sp. Ag109                     | WP_093502892.1 | WP_093502894.1 |
| Streptomyces sp. Ag109                     | WP_177233132.1 | WP_093503883.1 |
| Streptomyces sp. DvalAA-43                 | WP_093551853.1 | WP_093551851.1 |
| Amycolatopsis rubida                       | WP_244287150.1 | WP_093573244.1 |
| Streptomyces sp. TverLS-915                | WP_093581507.1 | WP_093581506.1 |
| Geodermatophilus amargosae                 | WP_093581999.1 | WP_093582001.1 |
| Streptomyces jietaisiensis                 | WP_006140449.1 | WP_093590517.1 |
| Lentzea waywayandensis                     | WP_030474579.1 | WP_093600023.1 |
| Streptomyces sp. 3213.3                    | WP_093627737.1 | WP_093627738.1 |
| Streptomyces sp. SceaMP-e96                | WP_093640007.1 | WP_093640010.1 |
| Streptomyces sp. 2314.4                    | WP_093481892.1 | WP_093648575.1 |
| Streptomyces sp. 2314.4                    | WP_093486102.1 | WP_093649214.1 |
| Streptomyces wuyuanensis                   | WP_093652934.1 | WP_093652935.1 |
| Streptomyces radiopugnans                  | WP_093657618.1 | WP_093657620.1 |
| Streptomyces radiopugnans                  | WP_093658100.1 | WP_093658102.1 |
| Streptomyces sp. DconLS                    | WP_037653387.1 | WP_093678048.1 |
| Streptomyces sp. 2231.1                    | WP_093478210.1 | WP_093696115.1 |
| Streptomyces sp. 2231.1                    | WP_093471999.1 | WP_093698568.1 |
| Streptomyces sp. 2131.1                    | WP_093710231.1 | WP_093710232.1 |
| Streptomyces sp. DII66                     | WP_093719771.1 | WP_093719772.1 |
| Streptomyces sp. DvalAA-14                 | WP_093735141.1 | WP_093735142.1 |
| Streptomyces sp. DvalAA-14                 | WP_161302157.1 | WP_093736425.1 |
| Streptomyces sp. DvalAA-14                 | WP_093742392.1 | WP_093742394.1 |
| Streptomyces sp. PAN                       | WP_030950128.1 | WP_093747306.1 |
| Streptomyces sp. PAN                       | WP_093748212.1 | WP_093748213.1 |
| Streptomyces sp. DvalAA-19                 | WP_093751039.1 | WP_093751041.1 |

|                                           |                |                |
|-------------------------------------------|----------------|----------------|
| Streptomyces sp. DvalAA-19                | WP_018488939.1 | WP_093755968.1 |
| Streptomyces sp. F-7                      | WP_093764049.1 | WP_093764048.1 |
| Streptomyces sp. F-7                      | WP_093768355.1 | WP_093768354.1 |
| Streptomyces sp. yr375                    | WP_093771493.1 | WP_093771495.1 |
| Streptomyces sp. yr375                    | WP_093771960.1 | WP_093771958.1 |
| Streptomyces sp. cf124                    | WP_045563578.1 | WP_093792519.1 |
| Streptomyces sp. Wb2n-11                  | WP_141662808.1 | WP_093798140.1 |
| Streptomyces sp. Wb2n-11                  | WP_093798910.1 | WP_093803294.1 |
| Streptomyces sp. PpalLS-921               | WP_028441963.1 | WP_093822361.1 |
| Streptomyces sp. SolWspMP-5a-2            | WP_093829545.1 | WP_093829448.1 |
| Streptomyces aidingensis                  | WP_093838732.1 | WP_093838733.1 |
| Streptomyces sp. ScaeMP-6W                | WP_067409957.1 | WP_093846860.1 |
| Streptomyces pini                         | WP_093848771.1 | WP_093848770.1 |
| Streptomyces pini                         | WP_093852155.1 | WP_093852154.1 |
| Streptomyces pini                         | WP_093852581.1 | WP_093852582.1 |
| Streptomyces sp. KS                       | WP_093868481.1 | WP_093868480.1 |
| Streptomyces sp. TLI                      | WP_093872456.1 | WP_093872455.1 |
| Streptosporangium canum                   | WP_093885431.1 | WP_093885432.1 |
| Streptomyces sp. Ncost-T10-10d            | WP_093897574.1 | WP_093897573.1 |
| Streptomyces sp. Ncost-T10-10d            | WP_093897912.1 | WP_093897913.1 |
| Streptomyces sp. LaPpAH-199               | WP_030329569.1 | WP_093901177.1 |
| Streptomyces sp. cf386                    | WP_093906549.1 | WP_093906548.1 |
| Streptomyces sp. cf386                    | WP_093908608.1 | WP_093908607.1 |
| Streptomyces sp. cf386                    | WP_093909747.1 | WP_093909746.1 |
| Amycolatopsis vastitatis                  | WP_093947113.1 | WP_093947112.1 |
| Streptomyces phaeoluteigriseus strain=DSM | WP_073491120.1 | WP_094103200.1 |
| Streptomyces katrae                       | WP_045951096.1 | WP_094192051.1 |
| Streptomyces diastatochromogenes          | WP_094217092.1 | WP_094217093.1 |
| Streptomyces sp. FBKL.4005                | WP_059247965.1 | WP_094374614.1 |
| Streptomyces kasugaensis                  | WP_094791590.1 | WP_094791589.1 |
| Nocardiosis dassonvillei strain=HZNU      | WP_094804934.1 | WP_094804933.1 |
| Plantactinospora sp. KBS50                | WP_095565328.1 | WP_095565327.1 |
| Streptomyces albireticuli                 | WP_095578862.1 | WP_095578863.1 |
| Streptomyces albireticuli                 | WP_095584670.1 | WP_095584671.1 |
| Streptomyces sp. SA15                     | WP_095748905.1 | WP_095748904.1 |
| Streptomyces sp. SA15                     | WP_095755417.1 | WP_095755416.1 |
| Streptomyces sp. SA15                     | WP_095755558.1 | WP_095755557.1 |
| Streptomyces xinghaiensis                 | WP_019711493.1 | WP_095757315.1 |
| Streptomyces sp. OV198                    | WP_095851261.1 | WP_095851260.1 |
| Streptomyces sp. OV198                    | WP_054237210.1 | WP_095853661.1 |
| Streptomyces sp. TLI                      | WP_095872102.1 | WP_095872101.1 |
| Streptomyces sp. Tue6028                  | WP_095937951.1 | WP_095937952.1 |
| Streptomyces sp. 2323.1                   | WP_096212264.1 | WP_096212263.1 |
| Glutamicibacter sp. BW80                  | WP_096288719.1 | WP_096288721.1 |
| Streptomyces sp. WZ.A104                  | WP_096624034.1 | WP_096624036.1 |
| Orenia metallireducens strain=MSL47       | WP_172431980.1 | WP_097019111.1 |
| Streptomyces sp. Ag82                     | WP_257027502.1 | WP_097215209.1 |
| Streptomyces sp. Ag82                     | WP_097222663.1 | WP_097222664.1 |
| Streptomyces sp. 1331.2                   | WP_097235009.1 | WP_097235010.1 |
| Nocardia amikacinintolerans               | WP_097244053.1 | WP_097244052.1 |
| Streptomyces sp. Ag109                    | WP_097253870.1 | WP_097253871.1 |
| Streptomyces sp. TLI                      | WP_097259582.1 | WP_097259581.1 |
| Streptomyces sp. TLI                      | WP_097268561.1 | WP_097268563.1 |
| Streptomyces sp. OK228                    | WP_054237210.1 | WP_097285463.1 |
| Streptomyces sp. rh34                     | WP_097871790.1 | WP_097871792.1 |
| Streptomyces sp. ms184                    | WP_097875785.1 | WP_097875786.1 |
| Streptomyces sp. st140                    | WP_229823766.1 | WP_097883651.1 |
| Streptomyces sp. b84                      | WP_097910303.1 | WP_097910304.1 |
| Streptomyces sp. rh195                    | WP_097936146.1 | WP_097936149.1 |
| Streptomyces sp. or20                     | WP_097962957.1 | WP_097962956.1 |
| Streptomyces sp. f51                      | WP_030720920.1 | WP_097972628.1 |
| Streptomyces sp. MBT59                    | WP_200735332.1 | WP_097985612.1 |
| Streptomyces sp. sk226                    | WP_030119114.1 | WP_098011552.1 |
| Streptomyces sp. st115                    | WP_030087338.1 | WP_098025996.1 |
| Streptomyces sp. st115                    | WP_257137580.1 | WP_098026439.1 |
| Priestia megaterium strain=AFS080677      | WP_098563550.1 | WP_098563549.1 |
| Nocardia terpenica strain=NC              | WP_098693463.1 | WP_098693464.1 |
| Micromonospora sp. WMMA1996               | WP_098744379.1 | WP_098744381.1 |
| Streptomyces sp. Ru87                     | WP_098753873.1 | WP_098753855.1 |
| Bacillus cereus strain=AFS057148          | WP_098796878.1 | WP_098796876.1 |
| Bacillus wiedmannii strain=AFS048126      | WP_180235969.1 | WP_098831824.1 |
| Streptomyces sp. ScaeMP-e48               | WP_031124558.1 | WP_099126841.1 |
| Micromonospora sp. WMMA2032               | WP_099160558.1 | WP_099160559.1 |
| Micromonospora sp. WMMA2032               | WP_099160719.1 | WP_099160720.1 |
| Streptomyces sp. SID4921                  | WP_099171225.1 | WP_099171224.1 |
| Streptomyces sp. SID4921                  | WP_202472708.1 | WP_099177863.1 |

|                                                 |                |                |
|-------------------------------------------------|----------------|----------------|
| <i>Streptomyces cinnamomeus</i>                 | WP_099202809.1 | WP_099202810.1 |
| <i>Streptomyces</i> sp. SID4919                 | WP_099284577.1 | WP_099284576.1 |
| <i>Streptomyces dengpaensis</i>                 | WP_099506612.1 | WP_099506611.1 |
| <i>Streptomyces</i> sp. TLI                     | WP_099900489.1 | WP_099900487.1 |
| <i>Streptomyces</i> sp. TLI                     | WP_099905963.1 | WP_099905965.1 |
| <i>Streptomyces</i> sp. JV178                   | WP_099963791.1 | WP_099963790.1 |
| <i>Streptomyces</i> sp. JV178                   | WP_099968520.1 | WP_099968519.1 |
| <i>Streptomyces</i> sp. Alain-F2R5              | WP_100044745.1 | WP_100044744.1 |
| <i>Streptomyces</i> sp. Alain-F2R5              | WP_100044756.1 | WP_100044757.1 |
| <i>Streptomyces</i> sp. Alain-F2R5              | WP_100046655.1 | WP_100046656.1 |
| <i>Streptomyces peucetius</i> subsp.            | WP_100109703.1 | WP_100109702.1 |
| <i>Streptomyces carminius</i>                   | WP_100200351.1 | WP_100200352.1 |
| <i>Streptomyces</i> sp. CB01373                 | WP_100569053.1 | WP_100569052.1 |
| <i>Streptomyces</i> sp. CB01201                 | WP_100577896.1 | WP_100577895.1 |
| <i>Streptomyces</i> sp. CB02120-2               | WP_008742304.1 | WP_100581074.1 |
| <i>Kitasatospora</i> sp. CB02891                | WP_100584261.1 | WP_100584260.1 |
| <i>Kitasatospora</i> sp. CB02891                | WP_100586108.1 | WP_100586109.1 |
| <i>Kitasatospora</i> sp. CB02891                | WP_100586140.1 | WP_100586139.1 |
| <i>Streptomyces</i> sp. CB01635                 | WP_100598568.1 | WP_100598569.1 |
| <i>Streptomyces</i> sp. CB02959                 | WP_100601780.1 | WP_100601779.1 |
| <i>Streptomyces</i> sp. CB02959                 | WP_100607836.1 | WP_100607837.1 |
| <i>Streptomyces</i> sp. M56                     | WP_069866999.1 | WP_100805800.1 |
| <i>Streptomyces barkulensis</i>                 | WP_101256770.1 | WP_101256769.1 |
| <i>Streptomyces barkulensis</i>                 | WP_101258072.1 | WP_101258071.1 |
| <i>Streptomyces barkulensis</i>                 | WP_101258549.1 | WP_101258548.1 |
| <i>Streptomyces</i> sp. TLI                     | WP_143676493.1 | WP_101390533.1 |
| <i>Streptomyces mirabilis</i> strain=P16B-1     | WP_101399151.1 | WP_101399153.1 |
| <i>Streptomyces</i> sp. CMB-StM0423             | WP_101420561.1 | WP_101420560.1 |
| <i>Streptomyces</i> sp. CMB-StM0423             | WP_159072350.1 | WP_101426476.1 |
| <i>Nocardia fluminea</i>                        | WP_101469010.1 | WP_101469009.1 |
| <i>Nonomuraea indica</i>                        | WP_101789086.1 | WP_101789087.1 |
| <i>Frankia canadensis</i>                       | WP_101830502.1 | WP_101830503.1 |
| <i>Frankia canadensis</i>                       | WP_165818404.1 | WP_101832165.1 |
| <i>Streptomyces</i> sp. SMS                     | WP_102637044.1 | WP_102637045.1 |
| <i>Micromonospora gifhornensis</i>              | WP_204291686.1 | WP_102656305.1 |
| <i>Streptomyces eurocidicus</i> strain=NRRL     | WP_102917436.1 | WP_102917435.1 |
| <i>Streptomyces diastaticus</i> strain=deep-sea | WP_102932866.1 | WP_102932867.1 |
| <i>Streptomyces malaysiensis</i> strain=F913    | WP_069866999.1 | WP_102936968.1 |
| <i>Streptomyces</i> sp. SM5                     | WP_103493044.1 | WP_103493045.1 |
| <i>Streptomyces</i> sp. SM5                     | WP_103493677.1 | WP_103493678.1 |
| <i>Streptomyces</i> sp. SM10                    | WP_103514755.1 | WP_103514756.1 |
| <i>Streptomyces</i> sp. SM10                    | WP_103515120.1 | WP_103515119.1 |
| <i>Streptomyces</i> sp. SM10                    | WP_103515321.1 | WP_103515320.1 |
| <i>Streptomyces</i> sp. SM11                    | WP_181009377.1 | WP_103533379.1 |
| <i>Streptomyces</i> sp. SM1                     | WP_103542132.1 | WP_103542131.1 |
| <i>Streptomyces populi</i>                      | WP_103548176.1 | WP_103548175.1 |
| <i>Streptomyces populi</i>                      | WP_103549087.1 | WP_103549088.1 |
| <i>Actinomadura rubteroloni</i>                 | WP_103565108.1 | WP_103565109.1 |
| <i>Actinomadura rubteroloni</i>                 | WP_103565512.1 | WP_103565511.1 |
| <i>Streptomyces</i> sp. Ru71                    | WP_103779486.1 | WP_103779488.1 |
| <i>Streptomyces</i> sp. Ru71                    | WP_103781755.1 | WP_103781756.1 |
| <i>Streptomyces</i> sp. Ru62                    | WP_103812006.1 | WP_103812005.1 |
| <i>Streptomyces</i> sp. Ru62                    | WP_103813457.1 | WP_103813458.1 |
| <i>Streptomyces</i> sp. Ru62                    | WP_103815541.1 | WP_103815543.1 |
| <i>Streptomyces</i> sp. Ru62                    | WP_103817976.1 | WP_103817975.1 |
| <i>Streptomyces</i> sp. Ru73                    | WP_103830958.1 | WP_103830959.1 |
| <i>Streptomyces</i> sp. Ru72                    | WP_103839815.1 | WP_103839814.1 |
| <i>Streptomyces</i> sp. Ru72                    | WP_103840017.1 | WP_103840018.1 |
| <i>Streptomyces</i> sp. Ru72                    | WP_258053649.1 | WP_103843394.1 |
| <i>Thermomonospora echinospora</i>              | WP_103936126.1 | WP_103936314.1 |
| <i>Thermomonospora echinospora</i>              | WP_103936558.1 | WP_103936559.1 |
| <i>Thermomonospora echinospora</i>              | WP_103944056.1 | WP_103943994.1 |
| <i>Micromonospora chalcea</i>                   | WP_104115206.1 | WP_104115205.1 |
| <i>Nocardia nova</i> strain=MDA3397             | WP_063012016.1 | WP_104366605.1 |
| <i>Nocardia nova</i> strain=MDA3139             | WP_104377506.1 | WP_104377507.1 |
| <i>Nocardia nova</i>                            | WP_104393203.1 | WP_104393204.1 |
| <i>Chroococcidiopsis</i> sp. TS-821             | WP_104547153.1 | WP_104547152.1 |
| <i>Streptomyces</i> sp. MH60                    | WP_104631721.1 | WP_104631722.1 |
| <i>Streptomyces tibetensis</i> strain=XZ        | WP_104781720.1 | WP_104781721.1 |
| <i>Streptomyces tibetensis</i> strain=XZ        | WP_104783700.1 | WP_104783697.1 |
| <i>Streptomyces</i> sp. QL37                    | WP_104791178.1 | WP_104791179.1 |
| <i>Kitasatospora</i> sp. MMS16-BH015            | WP_104817022.1 | WP_104817021.1 |
| <i>Kitasatospora</i> sp. MMS16-BH015            | WP_158702293.1 | WP_104817616.1 |
| <i>Phototrabdus akhurstii</i> strain=0813-124   | WP_217470356.1 | WP_105395333.1 |
| <i>Phototrabdus luminescens</i> strain=H4       | WP_105398013.1 | WP_105398014.1 |
| <i>Streptomyces geranii</i>                     | WP_105973315.1 | WP_105973316.1 |

|                                                   |                |                |
|---------------------------------------------------|----------------|----------------|
| <i>Streptomyces geranii</i>                       | WP_105975306.1 | WP_105975337.1 |
| <i>Actinopolyspora mortivallis</i> strain=M5A     | WP_258174921.1 | WP_106112961.1 |
| <i>Pseudosporangium ferrugineum</i>               | WP_106128966.1 | WP_106128965.1 |
| <i>Prauserella shujinwangii</i>                   | WP_245900404.1 | WP_106176888.1 |
| <i>Glaciihabitans tibetensis</i>                  | WP_106209762.1 | WP_106209760.1 |
| <i>Nonomuraea fuscirosea</i>                      | WP_106243241.1 | WP_106243243.1 |
| <i>Stenomitos frigidus</i>                        | WP_106259046.1 | WP_106259044.1 |
| <i>Geodermatophilus tzadiensis</i>                | WP_245887941.1 | WP_106279385.1 |
| <i>Actinocorallia populi</i>                      | WP_106396533.1 | WP_106396534.1 |
| <i>Streptomyces</i> sp. DH-12                     | WP_106415493.1 | WP_106415492.1 |
| <i>Streptomyces</i> sp. 111WW2                    | WP_003973654.1 | WP_106517740.1 |
| <i>Saccharothrix carnea</i>                       | WP_106618840.1 | WP_106618841.1 |
| <i>Saccharothrix carnea</i>                       | WP_106619810.1 | WP_106619811.1 |
| <i>Saccharothrix carnea</i>                       | WP_106620276.1 | WP_106620277.1 |
| <i>Nocardia</i> sp. MDA0666                       | WP_106956536.1 | WP_106956537.1 |
| <i>Streptomyces dioscori</i>                      | WP_107016218.1 | WP_107016219.1 |
| <i>Micromonospora</i> sp. MH33                    | WP_107077917.1 | WP_107077916.1 |
| <i>Streptomyces pristinaespiralis</i> strain=PR11 | WP_005310680.1 | WP_107082425.1 |
| <i>Streptomyces acidiscabies</i> strain=NCPBP     | WP_223786235.1 | WP_107085617.1 |
| <i>Streptomyces acidiscabies</i>                  | WP_199849143.1 | WP_107115968.1 |
| <i>Micromonospora</i> sp. RP3T                    | WP_107160341.1 | WP_107160339.1 |
| <i>Plantactinospora</i> sp. BB1                   | WP_107256409.1 | WP_107256407.1 |
| <i>Plantactinospora</i> sp. BC1                   | WP_107256409.1 | WP_107267143.1 |
| <i>Streptomyces</i> sp. P3                        | WP_107442671.1 | WP_107442670.1 |
| <i>Streptomyces</i> sp. P3                        | WP_107445216.1 | WP_107445217.1 |
| <i>Streptomyces</i> sp. A244                      | WP_107456074.1 | WP_107456073.1 |
| <i>Streptomyces</i> sp. A244                      | WP_107459502.1 | WP_107459504.1 |
| <i>Streptomyces</i> sp. MA5143a                   | WP_107464819.1 | WP_107464818.1 |
| <i>Streptomyces</i> sp. MA5143a                   | WP_107465653.1 | WP_107465654.1 |
| <i>Streptomyces chartreusis</i> strain=NA02069    | WP_107905484.1 | WP_107905483.1 |
| <i>Staphylococcus pasteurii</i> strain=SNUC       | WP_181300407.1 | WP_108000234.1 |
| <i>Streptomyces</i> sp. VMFN-G11Ma                | WP_108007559.1 | WP_108007558.1 |
| <i>Streptomyces</i> sp. MG                        | WP_128803851.1 | WP_108009527.1 |
| <i>Vitiosangium</i> sp. GDMCC                     | WP_199243092.1 | WP_108073782.1 |
| <i>Streptomyces lunaelactis</i> strain=MM109      | WP_108153308.1 | WP_108153309.1 |
| <i>Priestia megaterium</i> strain=YC4-R4          | WP_108674901.1 | WP_108674902.1 |
| <i>Streptomyces nigra</i>                         | WP_108707145.1 | WP_108707144.1 |
| <i>Streptomyces nigra</i>                         | WP_055624995.1 | WP_108708751.1 |
| <i>Streptomyces fragilis</i>                      | WP_108952140.1 | WP_108952141.1 |
| <i>Streptomyces fragilis</i>                      | WP_108955851.1 | WP_108955850.1 |
| <i>Streptomyces coelicoflavus</i>                 | WP_108986595.1 | WP_108986594.1 |
| <i>Streptomyces coelicoflavus</i>                 | WP_054099032.1 | WP_108989577.1 |
| <i>Streptomyces coelicoflavus</i>                 | WP_007389922.1 | WP_108989927.1 |
| <i>Streptomyces rishiriensis</i>                  | WP_109000726.1 | WP_109000725.1 |
| <i>Streptomyces rishiriensis</i>                  | WP_109002379.1 | WP_109002378.1 |
| <i>Streptomyces rubrogriseus</i> strain=SID7739   | WP_164275126.1 | WP_109033054.1 |
| <i>Streptomyces rubrogriseus</i>                  | WP_109033412.1 | WP_109033411.1 |
| <i>Streptomyces cinereoruber</i> subsp.           | WP_062757676.1 | WP_109186476.1 |
| <i>Streptomyces</i> sp. CS014                     | WP_065482189.1 | WP_109197470.1 |
| <i>Streptomyces</i> sp. CS207                     | WP_019326887.1 | WP_109202715.1 |
| <i>Streptomyces</i> sp. CS207                     | WP_031022574.1 | WP_109203818.1 |
| <i>Streptomyces orinoci</i>                       | WP_109282265.1 | WP_109282264.1 |
| <i>Streptomyces spongiicola</i>                   | WP_109293752.1 | WP_109293753.1 |
| <i>Streptomyces spongiicola</i> strain=531S       | WP_109294138.1 | WP_109294139.1 |
| <i>Streptomyces</i> sp. V2                        | WP_206301464.1 | WP_109361765.1 |
| <i>Streptomyces</i> sp. V2                        | WP_055720945.1 | WP_109362493.1 |
| <i>Streptomyces</i> sp. NWU339                    | WP_109382200.1 | WP_109382201.1 |
| <i>Streptomyces</i> sp. ICBB                      | WP_109447051.1 | WP_109447053.1 |
| <i>Streptomyces</i> sp. ICBB                      | WP_109449791.1 | WP_109449793.1 |
| <i>Streptomyces</i> sp. Act143                    | WP_109493384.1 | WP_109493383.1 |
| <i>Nocardia aurea</i>                             | WP_109525860.1 | WP_109525859.1 |
| <i>Streptomyces</i> sp. NWU49                     | WP_004991632.1 | WP_109539514.1 |
| <i>Lentzea deserti</i>                            | WP_109640593.1 | WP_109640592.1 |
| <i>Streptomyces</i> sp. CG                        | WP_109780050.1 | WP_109780049.1 |
| <i>Streptomyces</i> sp. CG                        | WP_109781804.1 | WP_109781803.1 |
| <i>Micromonospora</i> sp. 4G51                    | WP_109802655.1 | WP_109802654.1 |
| <i>Streptomyces</i> sp. ID38640                   | WP_208686743.1 | WP_109887866.1 |
| <i>Micromonospora</i> sp. S4605                   | WP_109905887.1 | WP_109905885.1 |
| <i>Streptomyces</i> sp. ZEA17I                    | WP_018488939.1 | WP_109915546.1 |
| <i>Streptomyces</i> sp. ZEA17I                    | WP_109915912.1 | WP_109915913.1 |
| <i>Streptomyces</i> sp. CS090A                    | WP_109977735.1 | WP_109977734.1 |
| <i>Geodermatophilus normandii</i>                 | WP_110007464.1 | WP_110004746.1 |
| <i>Nocardiosis</i> sp. L17-MgMaSL7                | WP_110049626.1 | WP_110049625.1 |
| <i>Photorhabdus luminescens</i> strain=H3         | WP_110091535.1 | WP_110091534.1 |
| <i>Nocardia tenerifensis</i>                      | WP_169335857.1 | WP_110293355.1 |
| <i>Modestobacter versicolor</i>                   | WP_110554062.1 | WP_110554061.1 |

|                                                 |                |                |
|-------------------------------------------------|----------------|----------------|
| Micromonospora arborensis                       | WP_110566543.1 | WP_110566545.1 |
| Micromonospora arborensis                       | WP_110567639.1 | WP_110567641.1 |
| Streptomyces griseosporus                       | WP_110627869.1 | WP_110627868.1 |
| Streptomyces actuosus strain=ATCC               | WP_110629348.1 | WP_110629347.1 |
| Streptomyces tateyamensis                       | WP_110667375.1 | WP_110667373.1 |
| Streptomyces sp. NTH33                          | WP_111005337.1 | WP_111005330.1 |
| Micromonospora deserti                          | WP_111134650.1 | WP_111134649.1 |
| Micromonospora craterilacus                     | WP_111216202.1 | WP_111216204.1 |
| Thermosporothrix hazakensis                     | WP_111321236.1 | WP_111321234.1 |
| Thermosporothrix hazakensis                     | WP_111324257.1 | WP_111324258.1 |
| Thermosporothrix hazakensis                     | WP_111326601.1 | WP_111326599.1 |
| Streptomyces sp. AC1-42W                        | WP_111334951.1 | WP_111334952.1 |
| Streptomyces sp. AC1-42W                        | WP_111339868.1 | WP_111339867.1 |
| Streptomyces sp. SID8358                        | WP_237512734.1 | WP_111381788.1 |
| Kitasatospora sp. SolWspMP-SS2h                 | WP_111551610.1 | WP_111551609.1 |
| Kitasatospora sp. SolWspMP-SS2h                 | WP_111556639.1 | WP_111556638.1 |
| Streptomyces sp. SID69                          | WP_111583916.1 | WP_111583915.1 |
| Streptomyces sp. Amel2xB2                       | WP_111603706.1 | WP_111603705.1 |
| Streptomyces sp. PsTaAH-137                     | WP_111660971.1 | WP_111660970.1 |
| Actinomadura craniellae                         | WP_111869757.1 | WP_111869756.1 |
| Actinomadura craniellae                         | WP_111870333.1 | WP_111870332.1 |
| Frankia sp. Ea1.12                              | WP_112105928.1 | WP_112105929.1 |
| Lentzea atacamensis strain=DSM                  | WP_109640593.1 | WP_112229177.1 |
| Phytoactinopolyspora halophila                  | WP_112260291.1 | WP_112260290.1 |
| Lentzea terrae                                  | WP_112263578.1 | WP_112263577.1 |
| Lentzea terrae                                  | WP_198681114.1 | WP_112271893.1 |
| Streptomyces cadmiisoli                         | WP_053757888.1 | WP_112440642.1 |
| Streptomyces sp. ICC1                           | WP_112448184.1 | WP_112448183.1 |
| Streptomyces triticisoli                        | WP_112466236.1 | WP_112466235.1 |
| Streptomyces sp. ST1020                         | WP_205123745.1 | WP_112474084.1 |
| Streptomyces sp. ST1020                         | WP_055720945.1 | WP_112474855.1 |
| Streptomyces sp. ST1020                         | WP_112474931.1 | WP_112474930.1 |
| Streptomyces sp. ST1020                         | WP_109361111.1 | WP_112475779.1 |
| Micromonospora noduli                           | WP_091394937.1 | WP_112581710.1 |
| Micromonospora noduli strain=ONO23              | WP_091394932.1 | WP_112603715.1 |
| Micromonospora saelicesensis strain=PSN01       | WP_091394937.1 | WP_112626178.1 |
| Micromonospora saelicesensis strain=GAR05       | WP_091394937.1 | WP_112672539.1 |
| Micromonospora saelicesensis strain=PSN13       | WP_091394932.1 | WP_112677784.1 |
| Micromonospora noduli strain=GUI43              | WP_091394937.1 | WP_112698630.1 |
| Micromonospora noduli strain=Lupac              | WP_112725944.1 | WP_112725943.1 |
| Micromonospora noduli strain=ONO86              | WP_091394937.1 | WP_112733820.1 |
| Photorhabdus sp. S8-52                          | WP_112878039.1 | WP_112878038.1 |
| Photorhabdus bodei strain=M-CN4                 | WP_146747460.1 | WP_112896048.1 |
| Streptomyces reniochaliniae                     | WP_114013654.1 | WP_114013653.1 |
| Sphaerisporangium album                         | WP_245966846.1 | WP_114031973.1 |
| Streptomyces sp. SDR-06                         | WP_114035345.1 | WP_114035344.1 |
| Streptomyces globosus                           | WP_114059252.1 | WP_114059253.1 |
| Streptomyces atratus                            | WP_114242776.1 | WP_114242775.1 |
| Streptomyces sp. Go-475                         | WP_114255097.1 | WP_114255098.1 |
| Marinitenerispora sediminis strain=TPS81        | WP_114400211.1 | WP_114400212.1 |
| Streptomyces corynorhini                        | WP_114626095.1 | WP_114626090.1 |
| Micromonospora aurantiaca strain=110B           | WP_013286647.1 | WP_114920547.1 |
| Staphylococcus saccharolyticus strain=NCTC11807 | WP_115314166.1 | WP_115314167.1 |
| Streptomyces sp. M7                             | WP_115507358.1 | WP_115507357.1 |
| Streptomyces sp. M7                             | WP_055624995.1 | WP_115509460.1 |
| Streptomyces sp. CB09001                        | WP_061443597.1 | WP_115743049.1 |
| Streptomyces sp. CB09001                        | WP_115744195.1 | WP_115744194.1 |
| Thermomonospora umbrina                         | WP_245974719.1 | WP_116021922.1 |
| Thermomonospora umbrina                         | WP_116023049.1 | WP_116023048.1 |
| Thermomonospora umbrina                         | WP_116026043.1 | WP_116026044.1 |
| Amycolatopsis palatopharyngis                   | WP_116041231.1 | WP_116041229.1 |
| Amycolatopsis palatopharyngis                   | WP_116041251.1 | WP_116041249.1 |
| Asanoa ferruginea strain=NBRC                   | WP_116073514.1 | WP_116073512.1 |
| Kutzneria buriramensis                          | WP_116177172.1 | WP_116177171.1 |
| Kutzneria buriramensis                          | WP_246016019.1 | WP_116178916.1 |
| Kutzneria buriramensis                          | WP_116178951.1 | WP_116178952.1 |
| Kutzneria buriramensis                          | WP_116180680.1 | WP_116180681.1 |
| Streptomyces olivoreticuli                      | WP_116211873.1 | WP_116211872.1 |
| Streptomyces spongiicola strain=531S            | WP_109293752.1 | WP_116427086.1 |
| Streptomyces sp. AcE210                         | WP_116500500.1 | WP_116500502.1 |
| Micromonospora sp. B006                         | WP_116506214.1 | WP_116506213.1 |
| Streptomyces sp. AcE210                         | WP_116509049.1 | WP_116509047.1 |
| Nocardiosis sp. TNDT3                           | WP_013155269.1 | WP_117198246.1 |
| Allorhizocola rhizosphaerae                     | WP_117209813.1 | WP_117209812.1 |
| Geodermatophilus sp. LHW52908                   | WP_117375887.1 | WP_117376099.1 |
| Micromonospora sp. MW-13                        | WP_117669219.1 | WP_117669218.1 |

|                                           |                |                |
|-------------------------------------------|----------------|----------------|
| Streptomyces sp. CC0208                   | WP_118082540.1 | WP_118082541.1 |
| Photorhabdus sp. CRClA-P01                | WP_118985878.1 | WP_118985877.1 |
| Streptomyces sporangiiformans             | WP_119105152.1 | WP_119105153.1 |
| Micromonospora radialis                   | WP_119572476.1 | WP_119572477.1 |
| Bailinahaonella thermotolerans            | WP_119924852.1 | WP_119924851.1 |
| Amycolatopsis panacis                     | WP_120026462.1 | WP_120026463.1 |
| Catellatospora citrea                     | WP_120316080.1 | WP_120316081.1 |
| Micromonospora globbae                    | WP_120327066.1 | WP_120326771.1 |
| Micromonospora tulbaghiaie strain=CNY-010 | WP_120569626.1 | WP_120569627.1 |
| Micromonospora musae                      | WP_120682125.1 | WP_120682127.1 |
| Micromonospora musae strain=MS1-9         | WP_120689804.1 | WP_120689805.1 |
| Streptomyces hungungensis                 | WP_120723490.1 | WP_120723489.1 |
| Micromonospora endolithica                | WP_120731080.1 | WP_120731262.1 |
| Streptomyces klenkii                      | WP_120759148.1 | WP_120759146.1 |
| Micromonospora costii                     | WP_120781487.1 | WP_120781486.1 |
| Micromonospora pisi                       | WP_121160318.1 | WP_121160319.1 |
| Saccharothrix variisporea                 | WP_121229662.1 | WP_121229664.1 |
| Actinokineospora cianjurenensis           | WP_121394613.1 | WP_121394614.1 |
| Micromonospora sp. M71                    | WP_121398735.1 | WP_121398734.1 |
| Streptomyces fungicidicus                 | WP_004922256.1 | WP_121548931.1 |
| Micromonospora sp. CV4                    | WP_121653756.1 | WP_121653755.1 |
| Micromonospora sp. BL4                    | WP_121653756.1 | WP_121677805.1 |
| Micromonospora sp. BL1                    | WP_121685260.1 | WP_121685259.1 |
| Streptomyces sp. E5N298                   | WP_076976334.1 | WP_121700878.1 |
| Streptomyces sp. E5N91                    | WP_121712212.1 | WP_121712214.1 |
| Streptomyces sp. E5N91                    | WP_121715898.1 | WP_121715896.1 |
| Streptomyces sp. E2N171                   | WP_048456510.1 | WP_121720169.1 |
| Streptomyces sp. E2N166                   | WP_121748947.1 | WP_121748946.1 |
| Streptomyces sp. E2N166                   | WP_121749198.1 | WP_121749197.1 |
| Streptomyces sp. S1                       | WP_121831483.1 | WP_121831482.1 |
| Streptomyces sp. S1                       | WP_121832940.1 | WP_121832941.1 |
| Streptomyces shenzhenensis                | WP_121893553.1 | WP_121893552.1 |
| Streptomyces triticirhizae                | WP_122185569.1 | WP_122185570.1 |
| Nocardia stercoris                        | WP_199742856.1 | WP_122189133.1 |
| Actinomadura harenae                      | WP_122195402.1 | WP_122195401.1 |
| Streptomyces sp. I5                       | WP_175446885.1 | WP_122212972.1 |
| Streptomyces sp. Tu                       | WP_122614441.1 | WP_122614442.1 |
| Streptomyces sp. Tu                       | WP_122616219.1 | WP_122616218.1 |
| Streptomyces sp. CJ                       | WP_250568901.1 | WP_123082844.1 |
| Micromonospora aurantiaca strain=ATCC     | WP_123109326.1 | WP_123109325.1 |
| Micromonospora sp. PPF5-17                | WP_123242886.1 | WP_123242895.1 |
| Streptomyces sp. PanSC9                   | WP_185091700.1 | WP_123440886.1 |
| Streptomyces sp. PanSC19                  | WP_123457063.1 | WP_123457064.1 |
| Streptomyces sp. ADI92-24                 | WP_123466905.1 | WP_123466903.1 |
| Streptomyces sp. 2132.2                   | WP_123517551.1 | WP_123517553.1 |
| Streptomyces sp. 840.1                    | WP_123524032.1 | WP_123524031.1 |
| Streptomyces sp. 840.1                    | WP_123529087.1 | WP_123529089.1 |
| Streptomyces sp. 840.1                    | WP_123531824.1 | WP_123531822.1 |
| Micromonospora sp. HM5-17                 | WP_123554299.1 | WP_123554301.1 |
| Micromonospora sp. HM5-17                 | WP_123561601.1 | WP_123561603.1 |
| Kitasatospora cineracea strain=DSM        | WP_123563725.1 | WP_123563726.1 |
| Kitasatospora niigatensis                 | WP_123564145.1 | WP_123564146.1 |
| Saccharothrix sp. 6-C                     | WP_123741987.1 | WP_123741986.1 |
| Kitasatospora niigatensis                 | WP_123821150.1 | WP_123821151.1 |
| Streptomyces sp. TLI                      | WP_123963413.1 | WP_123963412.1 |
| Streptomyces sp. Ag109                    | WP_123976897.1 | WP_123976898.1 |
| Streptomyces sp. Ag109                    | WP_123977770.1 | WP_123977771.1 |
| Streptomyces sp. A2-16                    | WP_123990545.1 | WP_123990544.1 |
| Streptomyces sp. ADI98-10                 | WP_233436053.1 | WP_124265852.1 |
| Streptomyces sp. ADI96-02                 | WP_124270535.1 | WP_124270536.1 |
| Streptomyces sp. ADI96-15                 | WP_033952008.1 | WP_124272857.1 |
| Streptomyces sp. ADI93-02                 | WP_099177864.1 | WP_124277447.1 |
| Streptomyces sp. ADI93-02                 | WP_124278790.1 | WP_124278791.1 |
| Streptomyces sp. NL15-2K                  | WP_124436671.1 | WP_124436672.1 |
| Streptomyces sp. NL15-2K                  | WP_124440019.1 | WP_124440018.1 |
| Streptomyces sp. ADI95-17                 | WP_124721961.1 | WP_124721960.1 |
| Streptomyces sp. ADI95-17                 | WP_124723609.1 | WP_124723610.1 |
| Micromonospora inaquosa                   | WP_124772628.1 | WP_124772693.1 |
| Micromonospora inaquosa                   | WP_124776089.1 | WP_124776087.1 |
| Micromonospora ureilytica strain=LB19     | WP_124815318.1 | WP_124815316.1 |
| Micromonospora arida                      | WP_124858863.1 | WP_124858864.1 |
| Micromonospora arida                      | WP_124861448.1 | WP_124861445.1 |
| Streptomyces sp. RP5T                     | WP_125190136.1 | WP_125190128.1 |
| Streptomyces sp. RP5T                     | WP_125193959.1 | WP_125193960.1 |
| Streptomyces griseofuscus strain=199      | WP_037653387.1 | WP_125209755.1 |
| Streptomyces sp. WAC                      | WP_125494557.1 | WP_125494558.1 |

|                                                     |                |                |
|-----------------------------------------------------|----------------|----------------|
| <i>Streptomyces thermoviolaceus</i>                 | WP_125497133.1 | WP_125497132.1 |
| <i>Streptomyces</i> sp. WAC                         | WP_125509061.1 | WP_125509059.1 |
| <i>Streptomyces</i> sp. WAC                         | WP_125514616.1 | WP_125514615.1 |
| <i>Streptomyces</i> sp. WAC                         | WP_125524878.1 | WP_125524879.1 |
| <i>Streptomyces</i> sp. WAC                         | WP_125525194.1 | WP_125525195.1 |
| <i>Streptomyces</i> sp. Tu102                       | WP_229914763.1 | WP_125527439.1 |
| <i>Streptomyces</i> sp. WAC                         | WP_032920569.1 | WP_125532186.1 |
| <i>Streptomyces</i> sp. VITNK9                      | WP_192341333.1 | WP_125536430.1 |
| <i>Streptomyces</i> sp. WAC06273                    | WP_031022574.1 | WP_125538230.1 |
| <i>Lapidilactobacillus mulanensis</i>               | WP_225417367.1 | WP_125578831.1 |
| <i>Streptomyces</i> sp. W1SF4                       | WP_241253730.1 | WP_125595235.1 |
| <i>Streptomyces</i> sp. WAC07061                    | WP_125602222.1 | WP_125602225.1 |
| <i>Streptomyces</i> sp. WAC07061                    | WP_125604356.1 | WP_125604358.1 |
| <i>Streptomyces</i> sp. WAC04770                    | WP_125614988.1 | WP_125614985.1 |
| <i>Streptomyces</i> sp. WAC04770                    | WP_018488939.1 | WP_125616609.1 |
| <i>Actinomadura</i> sp. WAC                         | WP_034517042.1 | WP_125617880.1 |
| <i>Streptomyces</i> sp. WAC                         | WP_125626636.1 | WP_125626635.1 |
| <i>Streptomyces</i> sp. H23                         | WP_134653694.1 | WP_125628859.1 |
| <i>Streptomyces</i> sp. WAC06614                    | WP_125640586.1 | WP_125640589.1 |
| <i>Streptomyces</i> sp. WAC06614                    | WP_125650142.1 | WP_125650144.1 |
| <i>Streptomyces</i> sp. WAC08241                    | WP_125662680.1 | WP_125662683.1 |
| <i>Streptomyces</i> sp. WAC08241                    | WP_125668324.1 | WP_125668323.1 |
| <i>Amycolatopsis</i> sp. WAC                        | WP_125737581.1 | WP_125737582.1 |
| <i>Streptomyces</i> sp. WAC01280                    | WP_125740676.1 | WP_125740678.1 |
| <i>Streptomyces</i> sp. WAC01280                    | WP_024758999.1 | WP_125747832.1 |
| <i>Streptomyces geysiriensis</i>                    | WP_086878133.1 | WP_125772650.1 |
| <i>Streptomyces</i> sp. WAC05458                    | WP_031022574.1 | WP_125774073.1 |
| <i>Streptomyces</i> sp. WAC07149                    | WP_125815159.1 | WP_125815160.1 |
| <i>Streptomyces</i> sp. WAC07149                    | WP_125815181.1 | WP_125815182.1 |
| <i>Streptomyces</i> sp. WAC07149                    | WP_125817957.1 | WP_125817956.1 |
| <i>Streptomyces</i> sp. W1SF4                       | WP_125602222.1 | WP_125820056.1 |
| <i>Streptomyces</i> sp. WAC                         | WP_125938071.1 | WP_125938072.1 |
| <i>Streptomyces</i> sp. WAC                         | WP_125939062.1 | WP_125939063.1 |
| <i>Streptomyces aquilus</i>                         | WP_126269602.1 | WP_126269601.1 |
| <i>Streptomyces</i> sp. BK042                       | WP_126274146.1 | WP_126274147.1 |
| <i>Delftia acidovorans</i>                          | WP_126312206.1 | WP_126312207.1 |
| <i>Streptomyces cyaneochromogenes</i>               | WP_126394749.1 | WP_126394751.1 |
| <i>Streptomyces cyaneochromogenes</i>               | WP_126395123.1 | WP_126395124.1 |
| <i>Streptomyces cyaneochromogenes</i>               | WP_126395647.1 | WP_126395646.1 |
| <i>Dictyobacter aurantiacus</i>                     | WP_160145892.1 | WP_126596805.1 |
| <i>Dictyobacter aurantiacus</i>                     | WP_126602790.1 | WP_126602788.1 |
| <i>Dictyobacter alpinus</i>                         | WP_126627698.1 | WP_126627697.1 |
| <i>Dictyobacter alpinus</i>                         | WP_126628849.1 | WP_126628848.1 |
| <i>Embleya hyalina</i>                              | WP_126638620.1 | WP_126638621.1 |
| <i>Streptomyces</i> sp. WAC05374                    | WP_126884917.1 | WP_126884918.1 |
| <i>Streptomyces</i> sp. WAC                         | WP_126899582.1 | WP_126899581.1 |
| <i>Streptomyces</i> sp. WAC                         | WP_126899782.1 | WP_126899783.1 |
| <i>Streptomyces luteovorticillatus</i> strain=CGMCC | WP_126917069.1 | WP_126917070.1 |
| <i>Streptomyces griseoviridis</i> strain=K61        | WP_127182399.1 | WP_127175914.1 |
| <i>Streptomyces griseoviridis</i> strain=K61        | WP_127177166.1 | WP_127177167.1 |
| <i>Streptomyces</i> sp. WAC08401                    | WP_127434763.1 | WP_127434762.1 |
| <i>Streptomyces</i> sp. WAC05458                    | WP_019326887.1 | WP_127436414.1 |
| <i>Streptomyces vinaceusdrappus</i>                 | WP_019326887.1 | WP_127438225.1 |
| <i>Streptomyces</i> sp. WAC04189                    | WP_031022574.1 | WP_127438570.1 |
| <i>Streptomyces geysiriensis</i>                    | WP_031022574.1 | WP_127441722.1 |
| <i>Streptomyces</i> sp. WAC08452                    | WP_031022574.1 | WP_127443915.1 |
| <i>Streptomyces</i> sp. WAC08452                    | WP_019326887.1 | WP_127444815.1 |
| <i>Streptomyces</i> sp. San01                       | WP_127830234.1 | WP_127830233.1 |
| <i>Streptomyces</i> sp. San01                       | WP_127832824.1 | WP_127832823.1 |
| <i>Streptomyces</i> sp. beijingensis strain=ES4-1   | WP_128175808.1 | WP_128175810.1 |
| <i>Streptomyces cavernae</i>                        | WP_128379334.1 | WP_128379333.1 |
| <i>Streptomyces cyaneus</i>                         | WP_128434717.1 | WP_128434718.1 |
| <i>Streptomyces cyaneus</i>                         | WP_164905120.1 | WP_128437320.1 |
| <i>Streptomyces inhibens</i>                        | WP_128512699.1 | WP_128512700.1 |
| <i>Streptomyces triticagri</i>                      | WP_233521763.1 | WP_128557676.1 |
| <i>Streptomyces triticagri</i>                      | WP_128558613.1 | WP_128558612.1 |
| <i>Streptomyces triticagri</i>                      | WP_128559485.1 | WP_128559484.1 |
| <i>Streptomyces murinus</i> strain=DSM              | WP_128790635.1 | WP_128790634.1 |
| <i>Streptomyces</i> sp. MG                          | WP_128802957.1 | WP_128802956.1 |
| <i>Streptomyces</i> sp. S063                        | WP_069739084.1 | WP_128818484.1 |
| <i>Streptomyces lavendulae</i> subsp.               | WP_128849742.1 | WP_128849744.1 |
| <i>Streptomyces roseicoloratus</i>                  | WP_128976624.1 | WP_128976623.1 |
| <i>Streptomyces</i> sp. M3                          | WP_099171225.1 | WP_129260499.1 |
| <i>Streptomyces</i> sp. M3                          | WP_099177864.1 | WP_129264028.1 |
| <i>Streptomyces</i> sp. TM32                        | WP_129281023.1 | WP_129281022.1 |
| <i>Streptomyces</i> sp. TM32                        | WP_129282708.1 | WP_129282709.1 |

|                                           |                |                |
|-------------------------------------------|----------------|----------------|
| Streptomyces sp. GZWMJZ-114               | WP_129287944.1 | WP_129287945.1 |
| Streptomyces sp. L2                       | WP_129308360.1 | WP_129308361.1 |
| Streptomyces sp. L2                       | WP_129308650.1 | WP_129308651.1 |
| Streptomyces sp. F001                     | WP_129797859.1 | WP_129797858.1 |
| Streptomyces sp. F001                     | WP_129800975.1 | WP_129800976.1 |
| Streptomyces albidoflavus strain=Ma1      | WP_129812819.1 | WP_129812817.1 |
| Streptomyces albidoflavus strain=CGMCC    | WP_129819353.1 | WP_129819355.1 |
| Streptomyces albidoflavus strain=CR46     | WP_129862756.1 | WP_129862757.1 |
| Ktedonosporobacter rubrisoli              | WP_129887962.1 | WP_129887961.1 |
| Ktedonosporobacter rubrisoli              | WP_129892622.1 | WP_129892621.1 |
| Micromonospora kangleipakensis            | WP_130337203.1 | WP_130337201.1 |
| Streptomyces sp. BK022                    | WP_130339064.1 | WP_130339062.1 |
| Nocardiosis sp. CNZ304                    | WP_130395408.1 | WP_130395407.1 |
| Micromonospora violae                     | WP_130400934.1 | WP_130400935.1 |
| Micromonospora violae                     | WP_130406886.1 | WP_130406884.1 |
| Streptomyces sp. BK239                    | WP_130437924.1 | WP_130437925.1 |
| Streptomyces sp. BK239                    | WP_130443013.1 | WP_130443011.1 |
| Krasilnikovia cinnamomea                  | WP_130510370.1 | WP_130510371.1 |
| Streptomyces tsukubensis strain=L20       | WP_006345757.1 | WP_130584695.1 |
| Streptomyces netropsis                    | WP_130876635.1 | WP_130876722.1 |
| Verrucospora sp. NA02020                  | WP_131054095.1 | WP_131054101.1 |
| Micromonospora zingiberis                 | WP_131303148.1 | WP_131303149.1 |
| Staphylococcus warneri strain=G25         | WP_131541437.1 | WP_131541438.1 |
| Streptomyces sp. COG20                    | WP_128840240.1 | WP_131543631.1 |
| Streptomyces sp. KM273126                 | WP_131559527.1 | WP_131559525.1 |
| Actinomadura roseirufa                    | WP_131737005.1 | WP_131737006.1 |
| Actinomadura roseirufa                    | WP_131738759.1 | WP_131738760.1 |
| Actinomadura fibrosa                      | WP_131757091.1 | WP_131757090.1 |
| Actinomadura fibrosa                      | WP_131759900.1 | WP_131759899.1 |
| Frankia symbiont of                       | WP_131784537.1 | WP_131784536.1 |
| Frankia symbiont of                       | WP_131786676.1 | WP_131786679.1 |
| Frankia symbiont of                       | WP_131786686.1 | WP_131786685.1 |
| Actinomadura sp. KC345                    | WP_243716588.1 | WP_131875865.1 |
| Actinomadura sp. KC345                    | WP_131883302.1 | WP_131883303.1 |
| Actinomadura rubrisoli                    | WP_131893028.1 | WP_131893030.1 |
| Actinomadura rubrisoli                    | WP_131893723.1 | WP_131893721.1 |
| Actinomadura rubrisoli                    | WP_131900641.1 | WP_131900639.1 |
| Actinomadura bangladeshensis              | WP_131936493.1 | WP_131936491.1 |
| Actinomadura bangladeshensis              | WP_131936815.1 | WP_131936813.1 |
| Actinomadura sp. GC306                    | WP_131949719.1 | WP_131949720.1 |
| Actinomadura sp. KC06                     | WP_131966084.1 | WP_131966083.1 |
| Actinomadura sp. 6K520                    | WP_131977338.1 | WP_131977335.1 |
| Actinomadura sp. 7K534                    | WP_132044904.1 | WP_132044906.1 |
| Actinocrispum wychmicini                  | WP_132113506.1 | WP_132113504.1 |
| Actinomadura sp. 7K507                    | WP_132148316.1 | WP_132148314.1 |
| Micromonospora sp. KC606                  | WP_132179407.1 | WP_132179409.1 |
| Micromonospora sp. KC606                  | WP_132184486.1 | WP_132184487.1 |
| Micromonospora sp. KC721                  | WP_132262619.1 | WP_132262621.1 |
| Micromonospora sp. KC721                  | WP_132264794.1 | WP_132264796.1 |
| Nonomurea longispora                      | WP_132332363.1 | WP_132332362.1 |
| Micromonospora sp. KC213                  | WP_132264794.1 | WP_132335047.1 |
| Micromonospora sp. KC213                  | WP_132336561.1 | WP_132336559.1 |
| Micromonospora sp. 15K316                 | WP_132347538.1 | WP_132347540.1 |
| Photorhabdus kharii subsp.                | WP_132356070.1 | WP_132356069.1 |
| Micromonospora sp. KC723                  | WP_132387675.1 | WP_132387677.1 |
| Micromonospora sp. KC207                  | WP_132397860.1 | WP_132397862.1 |
| Pseudonocardia endophytica                | WP_132430751.1 | WP_132430752.1 |
| Pseudonocardia endophytica                | WP_132430915.1 | WP_132430913.1 |
| Nonomurea diastatica                      | WP_132517216.1 | WP_132517214.1 |
| Nonomurea mesophila                       | WP_132630443.1 | WP_132630442.1 |
| Streptomyces vinaceus strain=JCM          | WP_189998650.1 | WP_132760193.1 |
| Streptomyces hainanensis                  | WP_132818641.1 | WP_132818640.1 |
| Streptomyces sp. BK205                    | WP_062240986.1 | WP_132837437.1 |
| Tamarichabitans halophyticus              | WP_132875351.1 | WP_132876126.1 |
| Photorhabdus tasmaniensis                 | WP_242688624.1 | WP_133813223.1 |
| Labedaea rhizosphaerae                    | WP_133851942.1 | WP_133851941.1 |
| Streptomyces sp. BK208                    | WP_133887352.1 | WP_133887351.1 |
| Streptomyces sp. BK208                    | WP_133890048.1 | WP_133890047.1 |
| Actinophytocola oryzae                    | WP_133908935.1 | WP_133908936.1 |
| Streptomyces sp. 846.5                    | WP_133996028.1 | WP_133996026.1 |
| Streptomyces bluensis                     | WP_134027759.1 | WP_134027761.1 |
| Mycobacteroides salmoniphilum strain=DE   | WP_134065552.1 | WP_134065551.1 |
| Mycobacteroides salmoniphilum strain=CCUG | WP_134086665.1 | WP_134086664.1 |
| Mycobacteroides salmoniphilum strain=CCUG | WP_134086665.1 | WP_134207057.1 |
| Streptomyces sp. H23                      | WP_134655752.1 | WP_134655751.1 |
| Streptomyces sp. S501                     | WP_033248917.1 | WP_134664616.1 |

|                                             |                |                |
|---------------------------------------------|----------------|----------------|
| Amycolatopsis sp. CFH                       | WP_051729294.1 | WP_134668720.1 |
| Saccharomonospora xinjiangensis strain=31sw | WP_134714643.1 | WP_134714645.1 |
| Amycolatopsis nivea                         | WP_051729294.1 | WP_134728117.1 |
| Streptomyces sp. MZ04                       | WP_135329920.1 | WP_135329921.1 |
| Streptomyces sp. MZ04                       | WP_245238837.1 | WP_135331620.1 |
| Streptomyces palmae                         | WP_135340789.1 | WP_135340788.1 |
| Streptomyces palmae                         | WP_135341669.1 | WP_135341668.1 |
| Streptomyces bauhiniae                      | WP_130339064.1 | WP_135787859.1 |
| Streptomyces griseoluteus                   | WP_130339064.1 | WP_135792021.1 |
| Streptomyces griseoluteus                   | WP_135792285.1 | WP_135792286.1 |
| Streptomyces sp. CRPSP2-6A1                 | WP_037653387.1 | WP_136100703.1 |
| Streptomyces sp. A0958                      | WP_136202484.1 | WP_136202485.1 |
| Streptomyces sp. A0958                      | WP_136203446.1 | WP_136203447.1 |
| Streptomyces sp. A1136                      | WP_136214077.1 | WP_136214078.1 |
| Streptomyces sp. A1136                      | WP_136215367.1 | WP_136215366.1 |
| Streptomyces sp. A1136                      | WP_136216020.1 | WP_136216021.1 |
| Streptomyces sp. A1547                      | WP_136226549.1 | WP_136226550.1 |
| Streptomyces sp. A0592                      | WP_206309831.1 | WP_136228654.1 |
| Streptomyces sp. A0592                      | WP_136231059.1 | WP_136231060.1 |
| Streptomyces sp. McG7                       | WP_019526893.1 | WP_136237292.1 |
| Streptomyces sp. A1277                      | WP_136315127.1 | WP_136315126.1 |
| Streptomyces sp. A1277                      | WP_136318374.1 | WP_136318375.1 |
| Streptomyces sp. A0642                      | WP_136326871.1 | WP_136326872.1 |
| Streptomyces sp. A0642                      | WP_136330634.1 | WP_136330633.1 |
| Streptomyces sp. BPSDS2                     | WP_137233345.1 | WP_137233346.1 |
| Streptomyces galbus strain=JCM              | WP_137300846.1 | WP_137300847.1 |
| Streptomyces lasalocidi                     | WP_137310037.1 | WP_137310038.1 |
| Gandjariella thermophila                    | WP_137812875.1 | WP_137812874.1 |
| Gandjariella thermophila                    | WP_225978476.1 | WP_137814812.1 |
| Gandjariella thermophila                    | WP_137815058.1 | WP_137815126.1 |
| Streptomyces sp. SGAir0924                  | WP_086878133.1 | WP_137961521.1 |
| Streptomyces montanus                       | WP_138046985.1 | WP_138046984.1 |
| Streptomyces marianii                       | WP_138053169.1 | WP_138053170.1 |
| Streptomyces marianii                       | WP_138056710.1 | WP_138056709.1 |
| Nonomurea sp. KC401                         | WP_138200424.1 | WP_138200423.1 |
| Saccharomonospora piscinae                  | WP_138381504.1 | WP_138381505.1 |
| Nostoc sp. PA-18-2419                       | WP_138500853.1 | WP_138500855.1 |
| Nonomurea turkmeniaca                       | WP_138672224.1 | WP_138672230.1 |
| Nonomurea zeae                              | WP_170246614.1 | WP_138689348.1 |
| Modestobacter excelsi                       | WP_246078525.1 | WP_138732795.1 |
| Modestobacter altitudinis                   | WP_138760059.1 | WP_138760058.1 |
| Streptomyces sp. DASNCL29                   | WP_138916868.1 | WP_138916869.1 |
| Micromonospora orduensis                    | WP_139582323.1 | WP_139582325.1 |
| Photorhabdus luminescens subsp.             | WP_139654589.1 | WP_139654588.1 |
| Streptomyces mimosae                        | WP_139666200.1 | WP_139666201.1 |
| Thermomonospora catenisporea                | WP_140179309.1 | WP_140179311.1 |
| Streptomyces griseorubiginosus strain=BTU6  | WP_141203706.1 | WP_141203707.1 |
| Streptomyces griseorubiginosus strain=BTU6  | WP_062242515.1 | WP_141206042.1 |
| Streptomyces griseorubiginosus strain=BTU6  | WP_141208233.1 | WP_141208232.1 |
| Streptomyces gardneri strain=JCM            | WP_141292396.1 | WP_141292395.1 |
| Streptomyces gardneri strain=JCM            | WP_229917567.1 | WP_141301191.1 |
| Streptomyces spinoverrucosus strain=JCM     | WP_141310956.1 | WP_141310955.1 |
| Streptomyces spinoverrucosus strain=JCM     | WP_141313561.1 | WP_141313560.1 |
| Streptomyces spinoverrucosus strain=JCM     | WP_141314473.1 | WP_141314471.1 |
| Streptomyces sp. 6-11-2                     | WP_141360115.1 | WP_141360116.1 |
| Streptomyces ipomoeae                       | WP_141574218.1 | WP_141574217.1 |
| Actinomadura sp. WMMA1423                   | WP_141576736.1 | WP_141576735.1 |
| Actinomadura sp. WMMA1423                   | WP_141586980.1 | WP_141579099.1 |
| Actinomadura sp. WMMA1423                   | WP_141585747.1 | WP_141585745.1 |
| Nocardia bhagyanarayanae                    | WP_141810632.1 | WP_141810633.1 |
| Micromonospora sp. A202                     | WP_141909553.1 | WP_141912696.1 |
| Actinoallomurus bryophytorum                | WP_141960628.1 | WP_141960626.1 |
| Saccharothrix saharensis                    | WP_141983139.1 | WP_141983138.1 |
| Amycolatopsis cihanbeyliensis               | WP_141995448.1 | WP_141995447.1 |
| Streptomyces sp. SLBN-31                    | WP_142142237.1 | WP_142142236.1 |
| Streptomyces sp. SLBN-134                   | WP_142167773.1 | WP_142167774.1 |
| Streptomyces calvus strain=JCM              | WP_142191738.1 | WP_142191739.1 |
| Streptomyces sp. SLBN-118                   | WP_142212319.1 | WP_142212318.1 |
| Streptomyces sp. SLBN-118                   | WP_142212346.1 | WP_142212345.1 |
| Streptomyces sp. SLBN-118                   | WP_142213056.1 | WP_142213055.1 |
| Streptomyces cavourensis strain=JCM         | WP_114932167.1 | WP_142229551.1 |
| Thermopolyspora flexuosa strain=JCM         | WP_142258115.1 | WP_142258116.1 |
| Streptomyces sp. SLBN-115                   | WP_028806148.1 | WP_142269139.1 |
| Streptomyces sp. SLBN-115                   | WP_142268398.1 | WP_142269842.1 |
| Geodermatophilus aqueductus                 | WP_142457132.1 | WP_142457131.1 |
| Microbisporea hainanensis                   | WP_142617084.1 | WP_142617085.1 |

|                                         |                |                |
|-----------------------------------------|----------------|----------------|
| Asanoa ishikariensis                    | WP_090801855.1 | WP_143050020.1 |
| Streptomyces sp. CB03234                | WP_143608579.1 | WP_143608583.1 |
| Streptomyces sp. 130                    | WP_143620281.1 | WP_143620283.1 |
| Streptomyces alkaliphilus strain=IF17   | WP_143621340.1 | WP_143621337.1 |
| Streptomyces sp. RLB1-9                 | WP_054237210.1 | WP_143627296.1 |
| Streptomyces sp. 1-11                   | WP_143630951.1 | WP_143630952.1 |
| Streptomyces alkaliterrae               | WP_228449519.1 | WP_143646041.1 |
| Streptomyces platensis                  | WP_085922255.1 | WP_143658798.1 |
| Catellatospora sichuanensis             | WP_144121436.1 | WP_144121437.1 |
| Streptomyces sp. SAJ15                  | WP_144382243.1 | WP_144382242.1 |
| Streptomyces sp. SAJ15                  | WP_260868042.1 | WP_144386837.1 |
| Amycolatopsis rhizosphaerae             | WP_144590985.1 | WP_144590986.1 |
| Amycolatopsis acidicola                 | WP_144748138.1 | WP_144748139.1 |
| Streptomyces sp. HF10                   | WP_145485853.1 | WP_145485854.1 |
| Streptomyces sp. CFMR                   | WP_018488939.1 | WP_145499183.1 |
| Streptomyces brevispora                 | WP_145767880.1 | WP_145767881.1 |
| Streptomyces brevispora                 | WP_145767977.1 | WP_145767976.1 |
| Micromonospora taraxaci                 | WP_145780252.1 | WP_145780253.1 |
| Micromonospora taraxaci                 | WP_145781505.1 | WP_145781507.1 |
| Kitasatospora atroaurantiaca            | WP_145791433.1 | WP_145791430.1 |
| Micromonospora sagamiensis strain=JCM   | WP_145818208.1 | WP_145818206.1 |
| Micromonospora sagamiensis strain=JCM   | WP_091462876.1 | WP_145818961.1 |
| Streptomyces sp. T12                    | WP_145825860.1 | WP_145825861.1 |
| Streptomyces sp. T12                    | WP_145830566.1 | WP_145830567.1 |
| Streptomyces capillispiralis strain=JCM | WP_167531889.1 | WP_145870550.1 |
| Streptomyces capillispiralis strain=JCM | WP_145870906.1 | WP_145870905.1 |
| Streptomyces sp. BK340                  | WP_145875966.1 | WP_145875967.1 |
| Streptomyces sp. BK340                  | WP_145885175.1 | WP_145885174.1 |
| Kitasatospora viridis                   | WP_145903334.1 | WP_145903335.1 |
| Micromonospora sp. HM134                | WP_145919797.1 | WP_145919798.1 |
| Streptomyces misionensis strain=66      | WP_146463428.1 | WP_146463426.1 |
| Streptomyces misionensis strain=66      | WP_146466907.1 | WP_146466906.1 |
| Streptomyces qinzhouensis               | WP_146482919.1 | WP_146482920.1 |
| Streptomyces sp. PsTaAH-130             | WP_243878016.1 | WP_146609828.1 |
| Streptomyces sp. ISID311                | WP_093481892.1 | WP_147245380.1 |
| Marinitenerispora sediminis             | WP_233515556.1 | WP_147281106.1 |
| Nocardia pseudobrasiliensis             | WP_067999258.1 | WP_147288138.1 |
| Streptomyces sp. wa22                   | WP_147960596.1 | WP_147960595.1 |
| Streptomyces sp. wa22                   | WP_147964244.1 | WP_147964243.1 |
| Streptomyces sp. col6                   | WP_147971641.1 | WP_147971642.1 |
| Streptomyces sp. ms191                  | WP_147981408.1 | WP_147981407.1 |
| Streptomyces sp. gb1                    | WP_147983109.1 | WP_147983108.1 |
| Streptomyces sp. gb1                    | WP_099177864.1 | WP_147983694.1 |
| Streptomyces sp. t39                    | WP_147992355.1 | WP_147992354.1 |
| Streptomyces sp. uw30                   | WP_147993786.1 | WP_147993787.1 |
| Streptomyces sp. uw30                   | WP_147994510.1 | WP_147994511.1 |
| Streptomyces sp. adm13                  | WP_148003503.1 | WP_148003504.1 |
| Streptomyces sp. me109                  | WP_148009391.1 | WP_148009390.1 |
| Streptomyces sp. me109                  | WP_148010172.1 | WP_148010171.1 |
| Streptomyces sp. or43                   | WP_148016255.1 | WP_148016254.1 |
| Streptomyces sp. or43                   | WP_148018246.1 | WP_148018247.1 |
| Streptomyces sp. or43                   | WP_148021793.1 | WP_148021792.1 |
| Streptomyces sp. SUK                    | WP_153813958.1 | WP_148025026.1 |
| Streptomyces lavendulae                 | WP_241670902.1 | WP_148026727.1 |
| Streptomyces sp. TLI                    | WP_260327433.1 | WP_148096491.1 |
| Actinomadura syzygii                    | WP_148349757.1 | WP_148349758.1 |
| Micromonospora sp. AP08                 | WP_148425427.1 | WP_148425428.1 |
| Micromonospora sp. AP08                 | WP_148426615.1 | WP_148426614.1 |
| Nonomurea sp. PA05                      | WP_148438170.1 | WP_148438169.1 |
| Micromonospora sp. WP24                 | WP_148482152.1 | WP_148482153.1 |
| Streptomyces sp. CB01881                | WP_148641379.1 | WP_148641380.1 |
| Streptomyces sp. CB01881                | WP_148646230.1 | WP_148646229.1 |
| Actinomadura decatromicini              | WP_148767276.1 | WP_148767275.1 |
| Micromonospora sp. MP36                 | WP_148799482.1 | WP_148799480.1 |
| Streptomyces sp. sk2.1                  | WP_148832703.1 | WP_148832705.1 |
| Streptomyces sp. sk2.1                  | WP_148835999.1 | WP_148835998.1 |
| Streptomyces parvus strain=C05          | WP_065482189.1 | WP_148902330.1 |
| Streptomyces sp. TRM49041               | WP_149179179.1 | WP_149179180.1 |
| Streptomyces sp. TRM49041               | WP_149183033.1 | WP_149183034.1 |
| Actinomadura sp. K4S16                  | WP_149256852.1 | WP_149256853.1 |
| Actinomadura sp. K4S16                  | WP_149256982.1 | WP_149256981.1 |
| Streptomyces marokkonensis              | WP_149550133.1 | WP_149550132.1 |
| Streptomyces marokkonensis              | WP_149552789.1 | WP_149552788.1 |
| Streptomyces cacaoi strain=OABC16       | WP_149561864.1 | WP_149561865.1 |
| Streptomyces tailanensis                | WP_149824364.1 | WP_149824366.1 |
| Streptomyces tailanensis                | WP_149828764.1 | WP_149828765.1 |

|                                                |                |                |
|------------------------------------------------|----------------|----------------|
| <i>Streptomyces tailanensis</i>                | WP_149829895.1 | WP_149829896.1 |
| <i>Streptomyces tendae</i> strain=139          | WP_150155855.1 | WP_150155856.1 |
| <i>Streptomyces venezuelae</i>                 | WP_071892241.1 | WP_150162374.1 |
| <i>Streptomyces venezuelae</i>                 | WP_150162919.1 | WP_150162918.1 |
| <i>Streptomyces</i> sp. SID339                 | WP_150163893.1 | WP_150163892.1 |
| <i>Streptomyces venezuelae</i> strain=ATCC     | WP_150181778.1 | WP_150181777.1 |
| <i>Streptomyces venezuelae</i> strain=ATCC     | WP_150211420.1 | WP_150211421.1 |
| <i>Streptomyces venezuelae</i> strain=ATCC     | WP_150213302.1 | WP_150213300.1 |
| <i>Streptomyces filamentosus</i> strain=JCM    | WP_150235358.1 | WP_150235357.1 |
| <i>Streptomyces albofaciens</i>                | WP_150244925.1 | WP_150244928.1 |
| <i>Nocardiosis deserti</i>                     | WP_150253963.1 | WP_150253962.1 |
| <i>Streptomyces venezuelae</i> strain=ATCC     | WP_150255519.1 | WP_150255517.1 |
| <i>Streptomyces venezuelae</i> strain=ATCC     | WP_223834581.1 | WP_150265320.1 |
| <i>Nocardia colli</i>                          | WP_223885192.1 | WP_150403202.1 |
| <i>Streptomyces galilaeus</i> strain=JCM       | WP_150469827.1 | WP_150469828.1 |
| <i>Streptomyces coeruleorubidus</i> strain=JCM | WP_150483079.1 | WP_150483080.1 |
| <i>Streptomyces nitrosporeus</i> strain=JCM    | WP_150487670.1 | WP_150487669.1 |
| <i>Streptomyces nitrosporeus</i> strain=JCM    | WP_150491408.1 | WP_150491409.1 |
| <i>Streptomyces chartreusis</i> strain=JCM     | WP_125525194.1 | WP_150498506.1 |
| <i>Streptomyces</i> sp. Tu102                  | WP_125524878.1 | WP_150499755.1 |
| <i>Streptomyces venezuelae</i> strain=ATCC     | WP_071892241.1 | WP_150502076.1 |
| <i>Streptomyces chartreusis</i> strain=JCM     | WP_107905484.1 | WP_150502529.1 |
| <i>Streptomyces spectabilis</i> strain=JCM     | WP_150511642.1 | WP_150511641.1 |
| <i>Streptomyces subbrutillus</i> strain=JCM    | WP_150521138.1 | WP_150521139.1 |
| <i>Micromonospora aurantiaca</i> strain=ALFB5  | WP_151012618.1 | WP_151012616.1 |
| <i>Micromonospora aurantiaca</i> strain=ALFB5  | WP_013286647.1 | WP_151015611.1 |
| <i>Micromonospora</i> sp. AMSO12t              | WP_151456460.1 | WP_151456461.1 |
| <i>Micromonospora</i> sp. AMSO31t              | WP_151463704.1 | WP_151463703.1 |
| <i>Streptomyces triticiradicis</i>             | WP_151470286.1 | WP_151470285.1 |
| <i>Streptomyces triticiradicis</i>             | WP_151470299.1 | WP_151470298.1 |
| <i>Streptomyces triticiradicis</i>             | WP_151472907.1 | WP_151472906.1 |
| <i>Micromonospora</i> sp. ALFpr18c             | WP_151491224.1 | WP_151491225.1 |
| <i>Micromonospora noduli</i> strain=ALFpr19a   | WP_151496888.1 | WP_151496886.1 |
| <i>Micromonospora noduli</i> strain=ALFpr19a   | WP_112587248.1 | WP_151497372.1 |
| <i>Micromonospora</i> sp. AMSO1212t            | WP_151500701.1 | WP_151500702.1 |
| <i>Actinomadura montaniterrae</i>              | WP_151538092.1 | WP_151538078.1 |
| <i>Actinomadura montaniterrae</i>              | WP_225991831.1 | WP_151541927.1 |
| <i>Actinomadura rudentiformis</i>              | WP_151565834.1 | WP_151565835.1 |
| <i>Streptomyces</i> sp. SS1-1                  | WP_151785927.1 | WP_151785928.1 |
| <i>Streptomyces phaeolivaceus</i>              | WP_152170392.1 | WP_152170391.1 |
| <i>Streptomyces mobaraensis</i> strain=US-43   | WP_152263811.1 | WP_152263812.1 |
| <i>Nocardiosis potens</i>                      | WP_017596465.1 | WP_152523152.1 |
| <i>Streptomyces spongiae</i>                   | WP_152776070.1 | WP_152776069.1 |
| <i>Streptomyces phyllanthi</i>                 | WP_152781321.1 | WP_152781323.1 |
| <i>Streptomyces acidicola</i>                  | WP_152861110.1 | WP_152861109.1 |
| <i>Streptomyces</i> sp. SYP-A7193              | WP_153177960.1 | WP_153177961.1 |
| <i>Streptomyces</i> sp. SYP-A7193              | WP_007389922.1 | WP_153182491.1 |
| <i>Streptomyces fagopyri</i>                   | WP_153287540.1 | WP_153287539.1 |
| <i>Streptomyces fagopyri</i>                   | WP_153289590.1 | WP_153289589.1 |
| <i>Nocardia</i> sp. SYP-A9097                  | WP_153807015.1 | WP_153807014.1 |
| <i>Micromonospora terminaliae</i>              | WP_154227277.1 | WP_154227276.1 |
| <i>Amycolatopsis pithecellobii</i>             | WP_154756759.1 | WP_154756758.1 |
| <i>Micromonospora palomenae</i>                | WP_170285275.1 | WP_154936512.1 |
| <i>Micromonospora palomenae</i>                | WP_154936426.1 | WP_154938701.1 |
| <i>Streptomyces taklimakanensis</i>            | WP_155071892.1 | WP_155071891.1 |
| <i>Streptomyces taklimakanensis</i>            | WP_155074180.1 | WP_155072797.1 |
| <i>Micromonospora</i> sp. CP22                 | WP_155220234.1 | WP_155220236.1 |
| <i>Salinispora cortesiana</i>                  | WP_025617617.1 | WP_155251559.1 |
| <i>Salinispora fenicalii</i>                   | WP_188116063.1 | WP_155255780.1 |
| <i>Micromonospora</i> sp. WMMC415              | WP_155331894.1 | WP_155331895.1 |
| <i>Catellatospora vulcania</i>                 | WP_155374711.1 | WP_155374712.1 |
| <i>Catellatospora paridis</i>                  | WP_155386714.1 | WP_155386713.1 |
| <i>Actinomadura</i> sp. NEAU-AAG7              | WP_156214142.1 | WP_156214143.1 |
| <i>Actinomadura litoris</i>                    | WP_156217180.1 | WP_156217181.1 |
| <i>Streptomyces ficellus</i>                   | WP_156691295.1 | WP_156691294.1 |
| <i>Nonomuraea typhae</i>                       | WP_246266817.1 | WP_157245971.1 |
| <i>Nonomuraea typhae</i>                       | WP_157254571.1 | WP_157254640.1 |
| <i>Nocardia terrae</i>                         | WP_157390918.1 | WP_157390919.1 |
| <i>Kibdelosporangium</i> sp. MJ126-NF4         | WP_042191460.1 | WP_157528722.1 |
| <i>Frankia inefficax</i>                       | WP_013425862.1 | WP_157735500.1 |
| <i>Laceyella sacchari</i>                      | WP_132221331.1 | WP_158283288.1 |
| <i>Methylomusa anaerophila</i>                 | WP_126307985.1 | WP_158618690.1 |
| <i>Saccharothrix deserti</i>                   | WP_158848663.1 | WP_158848665.1 |
| <i>Amycolatopsis anabasis</i>                  | WP_158884910.1 | WP_158884908.1 |
| <i>Streptomyces lateritius</i>                 | WP_189602561.1 | WP_158988099.1 |
| <i>Streptomyces lateritius</i>                 | WP_158988524.1 | WP_158988523.1 |

|                                               |                |                |
|-----------------------------------------------|----------------|----------------|
| Streptomyces tendae strain=UTMC               | WP_159328470.1 | WP_159328471.1 |
| Streptomyces caniferus                        | WP_159473871.1 | WP_159473868.1 |
| Streptomyces caniferus                        | WP_159478719.1 | WP_159478716.1 |
| Streptomyces libani subsp.                    | WP_109887868.1 | WP_159490936.1 |
| Streptomyces sp. GS7                          | WP_159505120.1 | WP_159505121.1 |
| Streptomyces sp. Tu                           | WP_159529846.1 | WP_159529848.1 |
| Streptomyces sp. Tu                           | WP_159538148.1 | WP_159538146.1 |
| Streptomyces sp. Tu                           | WP_159538178.1 | WP_159538180.1 |
| Streptomyces mexicanus strain=Marseille-Q0842 | WP_159661994.1 | WP_159661993.1 |
| Streptomyces mexicanus strain=Marseille-Q0842 | WP_159663618.1 | WP_159663620.1 |
| Streptomyces sp. Tu                           | WP_159682378.1 | WP_159682377.1 |
| Streptomyces sp. HF10                         | WP_159699921.1 | WP_159699918.1 |
| Streptomyces tubercidicus                     | WP_159746361.1 | WP_159746362.1 |
| Streptomyces tubercidicus                     | WP_159748644.1 | WP_159748645.1 |
| Streptomyces sp. HM190                        | WP_159768434.1 | WP_159768437.1 |
| Streptomyces sp. NHF165                       | WP_030874476.1 | WP_159789036.1 |
| Nocardia sp. CY41                             | WP_159848012.1 | WP_159848015.1 |
| Rathayibacter sp. VKM                         | WP_159907406.1 | WP_159907408.1 |
| Nocardioopsis sp. FR26                        | WP_160049992.1 | WP_159943633.1 |
| Streptomyces sp. BA2                          | WP_160502148.1 | WP_160502149.1 |
| Streptomyces sp. BA2                          | WP_202122577.1 | WP_160507967.1 |
| Amycolatopsis sp. SID8362                     | WP_160697638.1 | WP_160697637.1 |
| Streptomyces sp. HUCO-GS316                   | WP_161066589.1 | WP_161066588.1 |
| Streptomyces sp. HUCO-GS316                   | WP_202425755.1 | WP_161067909.1 |
| Actinomadura rayongensis                      | WP_161101230.1 | WP_161101231.1 |
| Actinomadura rayongensis                      | WP_161106078.1 | WP_161106077.1 |
| Actinomadura rayongensis                      | WP_161106409.1 | WP_161106410.1 |
| Nocardioopsis alba strain=SID5840             | WP_161110395.1 | WP_161110396.1 |
| Streptomyces sp. SID4982                      | WP_161148505.1 | WP_161148504.1 |
| Streptomyces sp. SID4985                      | WP_161180910.1 | WP_161180909.1 |
| Streptomyces sp. SID2999                      | WP_161190151.1 | WP_161190152.1 |
| Streptomyces sp. SID3915                      | WP_161197420.1 | WP_161197419.1 |
| Streptomyces sp. SID1328                      | WP_161204293.1 | WP_161204292.1 |
| Streptomyces sp. SID2563                      | WP_161210564.1 | WP_161210565.1 |
| Streptomyces sp. SID2563                      | WP_161212763.1 | WP_161212762.1 |
| Streptomyces sp. SID8352                      | WP_161227971.1 | WP_161227970.1 |
| Streptomyces sp. SID2888                      | WP_150478232.1 | WP_161239947.1 |
| Streptomyces sp. SID2119                      | WP_161263857.1 | WP_161263858.1 |
| Streptomyces sp. SID8374                      | WP_161280649.1 | WP_161280648.1 |
| Streptomyces sp. SID161                       | WP_161297626.1 | WP_161297627.1 |
| Streptomyces sp. SID5789                      | WP_161328193.1 | WP_161328192.1 |
| Streptomyces sp. SID486                       | WP_161297626.1 | WP_161332912.1 |
| Streptomyces sp. SID5606                      | WP_064732208.1 | WP_161341991.1 |
| Streptomyces sp. SID5643                      | WP_161366023.1 | WP_161366024.1 |
| Streptomyces sp. RK23                         | WP_167308249.1 | WP_161378582.1 |
| Streptomyces yatensis strain=DSM              | WP_211123038.1 | WP_161563367.1 |
| Streptacidiphilus jiangxiensis                | WP_042454702.1 | WP_161791316.1 |
| Tengunoibacter tsumagoiensis                  | WP_161975583.1 | WP_161975582.1 |
| Dictyobacter kobayashii                       | WP_126551648.1 | WP_161977431.1 |
| Phytoactinopolyspora mesophila                | WP_162449572.1 | WP_162449573.1 |
| Streptomyces sp. ICC1                         | WP_112447600.1 | WP_162688489.1 |
| Streptomyces sp. I5                           | WP_199218562.1 | WP_163041662.1 |
| Actinomadura bangladeshensis strain=SID10258  | WP_163057843.1 | WP_163057841.1 |
| Actinomadura bangladeshensis strain=SID10258  | WP_239067383.1 | WP_163058962.1 |
| Fodinicola acaciae                            | WP_163507024.1 | WP_163507023.1 |
| Pyxidicoccus trucidator                       | WP_164016412.1 | WP_164016414.1 |
| Streptomyces coelicoflavus strain=SID14172    | WP_087789537.1 | WP_164140188.1 |
| Streptomyces coelicoflavus strain=SID14172    | WP_164141212.1 | WP_164141210.1 |
| Streptomyces coelicoflavus strain=SID14172    | WP_164142652.1 | WP_164142651.1 |
| Streptomyces sp. 604F                         | WP_033952008.1 | WP_164179765.1 |
| Streptomyces bauhiniiae strain=SID7754        | WP_164193204.1 | WP_164193201.1 |
| Streptomyces anulatus strain=SID9598          | WP_164217722.1 | WP_164217719.1 |
| Streptomyces cyaneofuscatus strain=SID10855   | WP_164239016.1 | WP_164239018.1 |
| Streptomyces coelicoflavus strain=SID14163    | WP_164246430.1 | WP_164246429.1 |
| Streptomyces coelicoflavus strain=SID14163    | WP_164248100.1 | WP_164248103.1 |
| Streptomyces rochei strain=SID8161            | WP_019326887.1 | WP_164288174.1 |
| Streptomyces rochei strain=SID8161            | WP_203614059.1 | WP_164289359.1 |
| Streptomyces sp. SID11385                     | WP_164291522.1 | WP_164291521.1 |
| Streptomyces sp. SID13588                     | WP_203674380.1 | WP_164296350.1 |
| Streptomyces sp. SID12501                     | WP_164316087.1 | WP_164316086.1 |
| Streptomyces sp. S12                          | WP_164442018.1 | WP_164337809.1 |
| Streptomyces sp. OM5714                       | WP_153177960.1 | WP_164383244.1 |
| Streptomyces sp. OM5714                       | WP_164387087.1 | WP_164387086.1 |
| Streptomyces sp. SID9727                      | WP_164404360.1 | WP_164404359.1 |
| Streptomyces sp. SS06011                      | WP_222514322.1 | WP_164419096.1 |
| Streptomyces sp. SS06011                      | WP_164419751.1 | WP_164419752.1 |

|                                              |                |                |
|----------------------------------------------|----------------|----------------|
| Streptomyces sp. SID9913                     | WP_164442018.1 | WP_164442017.1 |
| Streptomyces tendae strain=VITAKN            | WP_167308249.1 | WP_164459790.1 |
| Streptomyces sp. SID14515                    | WP_164616396.1 | WP_164616395.1 |
| Streptomyces sp. SID9124                     | WP_164634852.1 | WP_164634877.1 |
| Modestobacter sp. KNN46-3                    | WP_241176062.1 | WP_164702725.1 |
| Streptomyces scabichelini                    | WP_165263515.1 | WP_165263516.1 |
| Streptomyces boncukensis                     | WP_206441616.1 | WP_165298627.1 |
| Streptomyces boncukensis                     | WP_165299957.1 | WP_165299958.1 |
| Streptomyces ureilyticus                     | WP_165340506.1 | WP_165340505.1 |
| Streptomyces ureilyticus                     | WP_165345028.1 | WP_165345027.1 |
| Actinopolyspora sp. BKK2                     | WP_242687707.1 | WP_165633801.1 |
| Streptomyces sp. KO7888                      | WP_007389922.1 | WP_165687632.1 |
| Frankia canadensis                           | WP_101830070.1 | WP_165818212.1 |
| Streptomyces sp. YIM                         | WP_165984168.1 | WP_165984167.1 |
| Streptomyces sp. JB150                       | WP_165995227.1 | WP_165995225.1 |
| Apibacter sp. B2966                          | WP_166004750.1 | WP_166004752.1 |
| Phytoactinopolyspora limicola strain=HAJB-30 | WP_246222641.1 | WP_166354896.1 |
| Catellatospora methionotrophica strain=NBRC  | WP_166382497.1 | WP_166382495.1 |
| Micromonospora chalcea strain=N18            | WP_262419428.1 | WP_166455922.1 |
| Streptomyces sp. VN1                         | WP_166625242.1 | WP_166625241.1 |
| Modestobacter marinus                        | WP_166756069.1 | WP_166754228.1 |
| Streptomyces liangshanensis strain=QMT-12    | WP_208298549.1 | WP_167024699.1 |
| Streptomyces xanthochromogenes               | WP_161244447.1 | WP_167153301.1 |
| Mesorhizobium helmanticense                  | WP_245437225.1 | WP_167434547.1 |
| Nocardia brasiliensis strain=AUSMDU00024985  | WP_167466294.1 | WP_167461247.1 |
| Nocardia brasiliensis strain=AUSMDU00024985  | WP_167462335.1 | WP_167462336.1 |
| Nocardia arthritidis strain=AUSMDU00012717   | WP_167473076.1 | WP_167473075.1 |
| Nocardia arthritidis strain=AUSMDU00012717   | WP_167476512.1 | WP_167476511.1 |
| Nocardia terpenica strain=AUSMDU00012715     | WP_167485614.1 | WP_167485615.1 |
| Nocardia terpenica strain=AUSMDU00012715     | WP_167485798.1 | WP_167485797.1 |
| Streptomyces viridodiataticus                | WP_266544412.1 | WP_167742636.1 |
| Streptomyces sp. 2BBP-J2                     | WP_093764049.1 | WP_167744081.1 |
| Streptomyces sp. SBST2-5                     | WP_167990015.1 | WP_167990014.1 |
| Micromonospora sp. HSS6-12                   | WP_168001713.1 | WP_168001714.1 |
| Planosporangium flavigriseum strain=NBRC     | WP_168079964.1 | WP_168079963.1 |
| Planosporangium mesophilum                   | WP_168115852.1 | WP_168115851.1 |
| Streptomyces thermoviolaceus                 | WP_168132039.1 | WP_168132040.1 |
| Streptomyces galbus strain=I339              | WP_168372031.1 | WP_168372032.1 |
| Streptomyces sp. RPA4-5                      | WP_085923414.1 | WP_168477797.1 |
| Streptomyces sp. RPA4-5                      | WP_168478849.1 | WP_168478848.1 |
| Streptomyces sp. RPA4-2                      | WP_168529083.1 | WP_168529084.1 |
| Streptomyces physcomitrii                    | WP_210430380.1 | WP_168539917.1 |
| Streptomyces sp. R302                        | WP_206325924.1 | WP_169089042.1 |
| Streptomyces sp. HNM0575                     | WP_206322633.1 | WP_169136276.1 |
| Streptomyces sp. GMY02                       | WP_009189295.1 | WP_169439434.1 |
| Streptomyces sp. HNM0574                     | WP_206323875.1 | WP_169443022.1 |
| Streptomyces sp. PKU-MA01144                 | WP_017948993.1 | WP_170813344.1 |
| Streptomyces morookaense                     | WP_171078909.1 | WP_171078758.1 |
| Streptomyces morookaense                     | WP_171079282.1 | WP_171079283.1 |
| Streptomyces morookaense                     | WP_171081940.1 | WP_171081942.1 |
| Streptomyces gossypisoli                     | WP_197972293.1 | WP_171108193.1 |
| Streptomyces gossypisoli                     | WP_171115565.1 | WP_171115564.1 |
| Streptomyces sp. S3                          | WP_171141337.1 | WP_171141338.1 |
| Streptomyces sp. S3                          | WP_171146481.1 | WP_171146482.1 |
| Flexivirga aerilata                          | WP_212755279.1 | WP_171152344.1 |
| Streptomyces sp. I05A-00742                  | WP_212764256.1 | WP_171166008.1 |
| Streptomyces sp. I05A-00742                  | WP_171168724.1 | WP_171168726.1 |
| Paenibacillus phytohabitans strain=LMG       | WP_171717784.1 | WP_171717785.1 |
| Streptomyces griseofuscus strain=199         | WP_125212812.1 | WP_172624370.1 |
| Kibdelosporangium persicum                   | WP_173134616.1 | WP_173134612.1 |
| Paenibacillus tritici                        | WP_173139927.1 | WP_173139925.1 |
| Streptomyces sp. CWH03                       | WP_173261898.1 | WP_173261901.1 |
| Streptomyces fulvorobeus                     | WP_173316616.1 | WP_173316617.1 |
| Micromonospora maritima                      | WP_174530268.1 | WP_174530269.1 |
| Micromonospora chalcea                       | WP_174536982.1 | WP_174536981.1 |
| Streptomyces samsunensis strain=SA31         | WP_174885060.1 | WP_174885061.1 |
| Candidatus Frankia nodulisporulans           | WP_163549377.1 | WP_175084283.1 |
| Paraburkholderia caffeinitolerans            | WP_175197137.1 | WP_175197138.1 |
| Streptomyces sp. TRM64462                    | WP_175410020.1 | WP_175410021.1 |
| Streptomyces hawaiiensis                     | WP_175433906.1 | WP_175433907.1 |
| Streptomyces hawaiiensis                     | WP_175434054.1 | WP_175434055.1 |
| Streptomyces sp. CAI-24                      | WP_217689166.1 | WP_175451492.1 |
| Streptomyces sp. KAI                         | WP_217684964.1 | WP_175463094.1 |
| Streptomyces sp. KAI-26                      | WP_217689166.1 | WP_175513483.1 |
| Streptomyces sp. CAI-85                      | WP_175521098.1 | WP_175521099.1 |
| Streptomyces sp. CAI-155                     | WP_217689166.1 | WP_175536986.1 |

|                                               |                |                |
|-----------------------------------------------|----------------|----------------|
| Nonomuraea montanisoli                        | WP_175591912.1 | WP_175591913.1 |
| Nonomuraea rhodomycinica                      | WP_175599160.1 | WP_175599159.1 |
| Verrucospora sp. NA02020                      | WP_131057750.1 | WP_176092684.1 |
| Streptomyces sp. NA04227                      | WP_176096748.1 | WP_176096750.1 |
| Streptomyces sp. NA02536                      | WP_004922256.1 | WP_176119037.1 |
| Streptomyces sp. NA03103                      | WP_125628858.1 | WP_176153823.1 |
| Amycolatopsis sp. Hca4                        | WP_176176748.1 | WP_176176749.1 |
| Streptomyces sp. NA02950                      | WP_176179940.1 | WP_176179941.1 |
| Kitasatospora sp. NA04385                     | WP_176190095.1 | WP_176190096.1 |
| Kitasatospora sp. NA04385                     | WP_176191890.1 | WP_176191891.1 |
| Streptomyces sp. CAI-17                       | WP_176395821.1 | WP_176395822.1 |
| Streptomyces chartreusis strain=NA02069       | WP_107902708.1 | WP_176575509.1 |
| Streptomyces sp. Ncost-T6T-1                  | WP_093811925.1 | WP_176711186.1 |
| Streptomyces sp. DconLS                       | WP_093681164.1 | WP_176736154.1 |
| Amycolatopsis mediterranei strain=HP-130      | WP_013227255.1 | WP_176742108.1 |
| Streptomyces rectiverticillatus               | WP_179079816.1 | WP_179079817.1 |
| Streptomyces rectiverticillatus               | WP_179081681.1 | WP_179081682.1 |
| Streptomyces sp. BR123                        | WP_179174084.1 | WP_179174083.1 |
| Streptomyces sp. 2R                           | WP_031124558.1 | WP_179280715.1 |
| Actinopolyspora biskrensis                    | WP_179537234.1 | WP_179537235.1 |
| Spinactinospora alkalitolerans                | WP_179641629.1 | WP_179641630.1 |
| Amycolatopsis endophytica                     | WP_179775604.1 | WP_179775605.1 |
| Micromonospora jinlongensis                   | WP_218907406.1 | WP_179779764.1 |
| Actinomadura citrea strain=JCM                | WP_179834171.1 | WP_179834172.1 |
| Actinomadura citrea strain=JCM                | WP_179835412.1 | WP_179835411.1 |
| Actinomadura citrea                           | WP_179837912.1 | WP_179837913.1 |
| Actinomadura luteofluorescens                 | WP_179842412.1 | WP_179842411.1 |
| Actinomadura luteofluorescens                 | WP_179842460.1 | WP_179842459.1 |
| Streptomyces sp. Rer75                        | WP_179937478.1 | WP_179937477.1 |
| Salinispora sp. H7-4                          | WP_218941259.1 | WP_180196951.1 |
| Delftia acidovorans strain=B804               | WP_180317316.1 | WP_180317317.1 |
| Streptomyces sp. NEAU-sy36                    | WP_180330497.1 | WP_180330498.1 |
| Staphylococcus haemolyticus strain=SH         | WP_180552055.1 | WP_180552054.1 |
| Mycobacteroides sp. LB1                       | WP_180747735.1 | WP_180747734.1 |
| Clostridium diolis strain=WST                 | WP_106884491.1 | WP_181246099.1 |
| Streptomyces alkaliterrae strain=OF3          | WP_228449519.1 | WP_181354603.1 |
| Streptomyces sp. WAC00263                     | WP_054237210.1 | WP_181650708.1 |
| Streptomyces himalayensis subsp.              | WP_181656945.1 | WP_181656946.1 |
| Nocardia gipuzkoensis                         | WP_181723859.1 | WP_181723858.1 |
| Streptomyces sp. PIP175                       | WP_181785808.1 | WP_181785809.1 |
| Streptomyces sp. WELS2                        | WP_181795443.1 | WP_181795444.1 |
| Streptomyces sp. WELS2                        | WP_181796544.1 | WP_181796543.1 |
| Streptomyces himalayensis                     | WP_181656945.1 | WP_181862801.1 |
| Streptomyces sp. SCUT-3                       | WP_182311834.1 | WP_182311833.1 |
| Streptomyces sp. SCUT-3                       | WP_182313743.1 | WP_182313742.1 |
| Streptacidiphilus sp. PB12-B1b                | WP_182445006.1 | WP_182445005.1 |
| Streptacidiphilus sp. P02-A3a                 | WP_182449877.1 | WP_182449876.1 |
| Streptomyces sp. GMR22                        | WP_182470205.1 | WP_182470204.1 |
| Streptomyces alkaliphilus                     | WP_143621340.1 | WP_182605770.1 |
| Streptomyces calidiresistens                  | WP_182663095.1 | WP_182663097.1 |
| Streptomyces murinus strain=DSM               | WP_037653387.1 | WP_182788191.1 |
| Streptomyces durbertensis                     | WP_182853643.1 | WP_182853644.1 |
| Streptomyces sp. gCLA4                        | WP_183065919.1 | WP_183065920.1 |
| Actinoplanes campanulatus strain=NBRC         | WP_183216028.1 | WP_183216030.1 |
| Nonomuraea dietziae                           | WP_183651365.1 | WP_183651367.1 |
| Prauserella isguenensis                       | WP_183658609.1 | WP_183658611.1 |
| Roseospora visakhapatnamensis                 | WP_184045010.1 | WP_184045012.1 |
| Nocardiosis mwathae                           | WP_184078163.1 | WP_184078165.1 |
| Micromonospora parathelypteridis strain=CGMCC | WP_184187678.1 | WP_184187675.1 |
| Streptomyces olivoverticillatus               | WP_184350984.1 | WP_184350985.1 |
| Roseospora goensis                            | WP_184433368.1 | WP_184433366.1 |
| Saccharopolyspora gloriosae                   | WP_184479478.1 | WP_184479477.1 |
| Micromonospora polyrhachis                    | WP_184537878.1 | WP_184537879.1 |
| Streptosporangium becharensense               | WP_184540167.1 | WP_184540165.1 |
| Streptomyces paradoxus                        | WP_184562546.1 | WP_184562544.1 |
| Streptomyces paradoxus                        | WP_184564496.1 | WP_184564494.1 |
| Streptomyces violarus strain=JCM              | WP_184594715.1 | WP_184594716.1 |
| Sphaerisporangium krabiense strain=NBRC       | WP_239139067.1 | WP_184617871.1 |
| Streptomyces netropsis strain=JCM             | WP_184736800.1 | WP_184736798.1 |
| Streptomyces albaduncus strain=JCM            | WP_184761959.1 | WP_184761960.1 |
| Streptomyces griseostramineus strain=JCM      | WP_184822519.1 | WP_184822521.1 |
| Kutzneria kofuensis                           | WP_184869175.1 | WP_184869174.1 |
| Sphaerisporangium siamense strain=NBRC        | WP_239122659.1 | WP_184884727.1 |
| Actinomadura livida strain=JCM                | WP_184885680.1 | WP_184885678.1 |
| Streptomyces luteogriseus                     | WP_184916075.1 | WP_184916079.1 |
| Planomonospora venezuelensis                  | WP_184939892.1 | WP_184939891.1 |

|                                               |                |                |
|-----------------------------------------------|----------------|----------------|
| <i>Kitasatospora kifunensis</i>               | WP_184943549.1 | WP_184941332.1 |
| <i>Nonomuraea endophytica</i>                 | WP_221340366.1 | WP_184960755.1 |
| <i>Streptomyces echinatus</i>                 | WP_184961137.1 | WP_184961139.1 |
| <i>Nonomuraea endophytica</i>                 | WP_184970423.1 | WP_184970425.1 |
| <i>Streptomyces caelestis</i> strain=JCM      | WP_184988227.1 | WP_184988230.1 |
| <i>Actinoplanes digitatis</i> strain=NBRC     | WP_184999081.1 | WP_184995638.1 |
| <i>Crossiella cryophila</i>                   | WP_185001993.1 | WP_185001992.1 |
| <i>Streptomyces</i> sp. AK010                 | WP_185012317.1 | WP_185012318.1 |
| <i>Streptomyces</i> sp. AK010                 | WP_185014455.1 | WP_185014456.1 |
| <i>Actinomadura coerulea</i> strain=JCM       | WP_185023857.1 | WP_185023858.1 |
| <i>Streptomyces candidus</i>                  | WP_185031413.1 | WP_185031415.1 |
| <i>Actinoplanes octamycinicus</i> strain=NBRC | WP_185043613.1 | WP_185043612.1 |
| <i>Nonomuraea jabiensis</i>                   | WP_185076174.1 | WP_185076173.1 |
| <i>Nonomuraea rubra</i>                       | WP_185110978.1 | WP_185110979.1 |
| <i>Streptomyces</i> sp. Ag109                 | WP_079424047.1 | WP_185117339.1 |
| <i>Pseudoalteromonas luteoviolacea</i>        | WP_142046477.1 | WP_185843442.1 |
| <i>Streptomyces</i> sp. TYQ1024               | WP_185943432.1 | WP_185943431.1 |
| <i>Streptomyces</i> sp. PSKA01                | WP_186285191.1 | WP_186285190.1 |
| <i>Streptomyces</i> sp. PSKA01                | WP_186288038.1 | WP_186288037.1 |
| <i>Actinomadura alba</i>                      | WP_187245481.1 | WP_187245366.1 |
| <i>Nocardiosis alba</i> ATCC                  | WP_014908193.1 | WP_187294569.1 |
| <i>Actinoplanes lobatus</i> strain=NBRC       | WP_188119222.1 | WP_188119223.1 |
| <i>Lentzea indica</i>                         | WP_167969141.1 | WP_188134520.1 |
| <i>Nonomuraea</i> sp. SYSU                    | WP_188190198.1 | WP_188190199.1 |
| <i>Streptomyces</i> sp. CBMA291               | WP_223183841.1 | WP_188267078.1 |
| <i>Streptomyces</i> sp. CBMA152               | WP_223185214.1 | WP_188275488.1 |
| <i>Streptomyces</i> sp. CBMA152               | WP_188276710.1 | WP_188276711.1 |
| <i>Streptomyces</i> sp. CBMA29                | WP_188280342.1 | WP_188280343.1 |
| <i>Streptomyces</i> sp. TRM68416              | WP_188287448.1 | WP_188287449.1 |
| <i>Streptomyces</i> sp. CBMA123               | WP_188309032.1 | WP_188309031.1 |
| <i>Verrucosipora sonchi</i>                   | WP_189043807.1 | WP_189043809.1 |
| <i>Longimycelium tulufanense</i>              | WP_189057074.1 | WP_189057076.1 |
| <i>Longimycelium tulufanense</i>              | WP_189060662.1 | WP_189060701.1 |
| <i>Streptomyces kronopolitis</i>              | WP_189096347.1 | WP_189096348.1 |
| <i>Streptomyces kronopolitis</i>              | WP_189100854.1 | WP_189100962.1 |
| <i>Streptomyces camponoticapitis</i>          | WP_189106460.1 | WP_189106461.1 |
| <i>Streptomyces camponoticapitis</i>          | WP_189111435.1 | WP_189111436.1 |
| <i>Nonomuraea cavernae</i>                    | WP_189128782.1 | WP_189128783.1 |
| <i>Streptomyces lacrimifluminis</i>           | WP_229695048.1 | WP_189145902.1 |
| <i>Streptomyces lacrimifluminis</i>           | WP_189151475.1 | WP_189151474.1 |
| <i>Lentzea pudingi</i>                        | WP_189159209.1 | WP_189159208.1 |
| <i>Sphaerisporangium melleum</i>              | WP_229691441.1 | WP_189165476.1 |
| <i>Pilimelia anulata</i>                      | WP_189170565.1 | WP_189170566.1 |
| <i>Streptomyces albiflavescens</i>            | WP_189185730.1 | WP_189185729.1 |
| <i>Streptomyces albiflavescens</i>            | WP_189188626.1 | WP_189188625.1 |
| <i>Streptomyces albiflavescens</i>            | WP_189192252.1 | WP_189192251.1 |
| <i>Micromonospora fulviviridis</i>            | WP_189196657.1 | WP_189196656.1 |
| <i>Streptomyces purpureus</i> strain=JCM      | WP_189200064.1 | WP_189200062.1 |
| <i>Couchioplanes caeruleus</i>                | WP_189207320.1 | WP_189207321.1 |
| <i>Couchioplanes caeruleus</i>                | WP_189207926.1 | WP_189207927.1 |
| <i>Actinokineospora fastidiosa</i>            | WP_189212772.1 | WP_189212773.1 |
| <i>Streptomyces ruber</i>                     | WP_229820870.1 | WP_189215810.1 |
| <i>Streptomyces ruber</i>                     | WP_189215975.1 | WP_189215974.1 |
| <i>Saccharothrix coeruleofusca</i>            | WP_189225176.1 | WP_189225175.1 |
| <i>Saccharothrix coeruleofusca</i>            | WP_189227508.1 | WP_189227509.1 |
| <i>Streptomyces flaveolus</i>                 | WP_189228664.1 | WP_189228665.1 |
| <i>Streptomyces flaveolus</i>                 | WP_189229595.1 | WP_189229596.1 |
| <i>Streptosporangium pseudovulgare</i>        | WP_189249556.1 | WP_189249557.1 |
| <i>Lentzea flava</i>                          | WP_189258525.1 | WP_189258524.1 |
| <i>Streptomyces fuscichromogenes</i>          | WP_189260618.1 | WP_189260619.1 |
| <i>Streptomyces fuscichromogenes</i>          | WP_189267208.1 | WP_189267209.1 |
| <i>Kitasatospora griseola</i> strain=JCM      | WP_189270815.1 | WP_189270816.1 |
| <i>Kitasatospora griseola</i> strain=JCM      | WP_043910450.1 | WP_189270846.1 |
| <i>Kitasatospora griseola</i> strain=JCM      | WP_100584261.1 | WP_189273022.1 |
| <i>Streptomyces atratus</i> strain=JCM        | WP_189278137.1 | WP_189278139.1 |
| <i>Streptomyces fumigatiscleroticus</i>       | WP_189287034.1 | WP_189287033.1 |
| <i>Streptomyces albospinus</i>                | WP_189299924.1 | WP_189299922.1 |
| <i>Streptomyces cinerochromogenes</i>         | WP_189304898.1 | WP_189304895.1 |
| <i>Streptomyces cinerochromogenes</i>         | WP_189307151.1 | WP_189307153.1 |
| <i>Streptomyces brasiliensis</i>              | WP_189313271.1 | WP_189313272.1 |
| <i>Streptomyces flaveus</i>                   | WP_189324913.1 | WP_189324914.1 |
| <i>Actinoplanes ianthinogenes</i> strain=NBRC | WP_189330336.1 | WP_189330337.1 |
| <i>Streptomyces gancidicus</i>                | WP_006134517.1 | WP_189406846.1 |
| <i>Streptomyces gancidicus</i>                | WP_006130548.1 | WP_189408133.1 |
| <i>Streptomyces abikoensis</i>                | WP_189451468.1 | WP_189451467.1 |
| <i>Streptomyces kurssanovii</i>               | WP_189471842.1 | WP_189471844.1 |

|                                                 |                |                |
|-------------------------------------------------|----------------|----------------|
| <i>Streptomyces kurssanovii</i>                 | WP_229835354.1 | WP_189473747.1 |
| <i>Streptomyces narbonensis</i>                 | WP_189507698.1 | WP_189507696.1 |
| <i>Streptomyces narbonensis</i>                 | WP_229833118.1 | WP_189513450.1 |
| <i>Paludibacterium paludis</i> strain=BCRC      | WP_189532434.1 | WP_189532432.1 |
| <i>Streptomyces gelaticus</i>                   | WP_189541718.1 | WP_189541719.1 |
| <i>Streptomyces gelaticus</i>                   | WP_189545377.1 | WP_189545376.1 |
| <i>Streptomyces lavendofoliae</i>               | WP_189554001.1 | WP_189554000.1 |
| <i>Streptomyces pilosus</i> strain=JCM          | WP_189558826.1 | WP_189558827.1 |
| <i>Streptomyces pilosus</i> strain=JCM          | WP_189561441.1 | WP_189561440.1 |
| <i>Streptomyces massasporeus</i>                | WP_189590127.1 | WP_189590126.1 |
| <i>Streptomyces massasporeus</i>                | WP_189592636.1 | WP_189592637.1 |
| <i>Streptomyces flavoviridis</i>                | WP_189561441.1 | WP_189598652.1 |
| <i>Streptomyces chromofuscus</i>                | WP_189696935.1 | WP_189696936.1 |
| <i>Streptomyces chromofuscus</i>                | WP_189700481.1 | WP_189700480.1 |
| <i>Streptomyces anandii</i>                     | WP_189703660.1 | WP_189703661.1 |
| <i>Streptomyces anandii</i>                     | WP_189705841.1 | WP_189705842.1 |
| <i>Streptomyces phaeofaciens</i>                | WP_189708002.1 | WP_189708000.1 |
| <i>Streptomyces phaeofaciens</i>                | WP_189717644.1 | WP_189717643.1 |
| <i>Streptomyces nojiriensis</i>                 | WP_189735014.1 | WP_189735012.1 |
| <i>Streptomyces tendae</i>                      | WP_189739026.1 | WP_189739023.1 |
| <i>Streptomyces nojiriensis</i>                 | WP_189742398.1 | WP_189742395.1 |
| <i>Streptomyces tendae</i>                      | WP_189745794.1 | WP_189745652.1 |
| <i>Streptomyces</i> sp. MBT70                   | WP_030783113.1 | WP_189752543.1 |
| <i>Streptomyces</i> sp. MBT70                   | WP_189754806.1 | WP_189754805.1 |
| <i>Streptomyces</i> sp. MBT70                   | WP_189755688.1 | WP_189755687.1 |
| <i>Streptomyces capitiformicae</i> strain=CGMCC | WP_189783101.1 | WP_189783102.1 |
| <i>Streptomyces capitiformicae</i> strain=CGMCC | WP_189787163.1 | WP_189787162.1 |
| <i>Streptosporangium violaceochromogenes</i>    | WP_189791396.1 | WP_189791395.1 |
| <i>Streptomyces thermodiastaticus</i>           | WP_189795581.1 | WP_189795582.1 |
| <i>Streptomyces thermodiastaticus</i>           | WP_189796167.1 | WP_189796168.1 |
| <i>Streptomyces tanashiensis</i>                | WP_189802827.1 | WP_189802828.1 |
| <i>Streptomyces tanashiensis</i>                | WP_189806846.1 | WP_189806847.1 |
| <i>Streptomyces</i> sp. KD18                    | WP_189808656.1 | WP_189808657.1 |
| <i>Streptomyces olivaceoviridis</i>             | WP_189819366.1 | WP_189819365.1 |
| <i>Streptomyces finlayi</i>                     | WP_189827099.1 | WP_189827100.1 |
| <i>Streptomyces zaomyceticus</i>                | WP_189830206.1 | WP_189830205.1 |
| <i>Streptomyces umbrinus</i>                    | WP_189838180.1 | WP_189838181.1 |
| <i>Streptomyces omiyaensis</i>                  | WP_189852291.1 | WP_189852292.1 |
| <i>Streptomyces poonensis</i>                   | WP_189859650.1 | WP_189859652.1 |
| <i>Streptomyces albulus</i>                     | WP_189865832.1 | WP_189865834.1 |
| <i>Streptomyces viridiviolaceus</i>             | WP_189868547.1 | WP_189868546.1 |
| <i>Streptomyces viridiviolaceus</i>             | WP_189873075.1 | WP_189873073.1 |
| <i>Streptomyces bluensis</i>                    | WP_189878216.1 | WP_189878218.1 |
| <i>Streptomyces xantholiticus</i>               | WP_189889759.1 | WP_189889761.1 |
| <i>Streptomyces canarius</i>                    | WP_189892396.1 | WP_189892399.1 |
| <i>Streptomyces spiralis</i>                    | WP_189900708.1 | WP_189900710.1 |
| <i>Streptomyces spiralis</i>                    | WP_030185799.1 | WP_189908284.1 |
| <i>Streptomyces viridodiastaticus</i>           | WP_266404799.1 | WP_189912588.1 |
| <i>Kitasatospora xanthocidica</i>               | WP_189917581.1 | WP_189917579.1 |
| <i>Kitasatospora xanthocidica</i>               | WP_189926075.1 | WP_189926077.1 |
| <i>Streptomyces aurantiogriseus</i>             | WP_189944199.1 | WP_189944198.1 |
| <i>Streptomyces roseolus</i>                    | WP_189955276.1 | WP_189955274.1 |
| <i>Streptomyces alanosinicus</i>                | WP_189958588.1 | WP_189958587.1 |
| <i>Streptomyces violascens</i>                  | WP_189964187.1 | WP_189964190.1 |
| <i>Streptomyces termitum</i>                    | WP_189976313.1 | WP_189976314.1 |
| <i>Streptomyces capoamus</i>                    | WP_189981677.1 | WP_189981680.1 |
| <i>Streptomyces anulatus</i> strain=JCM         | WP_050357095.1 | WP_190007046.1 |
| <i>Streptomyces lucensis</i>                    | WP_190019240.1 | WP_190019241.1 |
| <i>Streptomyces hirosheimensis</i>              | WP_190023243.1 | WP_190023244.1 |
| <i>Streptomyces goshikiensis</i>                | WP_008742304.1 | WP_190030823.1 |
| <i>Streptomyces lomondensis</i>                 | WP_229906323.1 | WP_190049543.1 |
| <i>Streptomyces lomondensis</i>                 | WP_190054854.1 | WP_190054855.1 |
| <i>Streptomyces echinoruber</i>                 | WP_229879396.1 | WP_190056959.1 |
| <i>Streptomyces echinoruber</i>                 | WP_190056993.1 | WP_190056994.1 |
| <i>Streptomyces echinoruber</i>                 | WP_190058864.1 | WP_190058863.1 |
| <i>Streptomyces echinoruber</i>                 | WP_190061155.1 | WP_190061154.1 |
| <i>Streptomyces griseocarneus</i>               | WP_190066554.1 | WP_190066555.1 |
| <i>Streptomyces griseocarneus</i>               | WP_190067410.1 | WP_190067409.1 |
| <i>Streptomyces lanatus</i>                     | WP_190069709.1 | WP_190069710.1 |
| <i>Streptomyces lanatus</i>                     | WP_190075884.1 | WP_190075885.1 |
| <i>Streptomyces longisporoflavus</i>            | WP_190085605.1 | WP_190085606.1 |
| <i>Streptomyces melanogenes</i>                 | WP_190091610.1 | WP_190091609.1 |
| <i>Streptomyces griseoflavus</i>                | WP_190096659.1 | WP_190096660.1 |
| <i>Streptomyces nashvillensis</i>               | WP_190102193.1 | WP_190102192.1 |
| <i>Streptomyces nashvillensis</i>               | WP_190107306.1 | WP_190107305.1 |
| <i>Streptomyces cinnamoneus</i> strain=JCM      | WP_190108496.1 | WP_190108497.1 |

|                                                    |                |                |
|----------------------------------------------------|----------------|----------------|
| <i>Streptomyces flavofungini</i> strain=JCM        | WP_190120298.1 | WP_190120297.1 |
| <i>Streptomyces inusitatus</i>                     | WP_190123623.1 | WP_190123622.1 |
| <i>Streptomyces mashuensis</i>                     | WP_190132207.1 | WP_190132206.1 |
| <i>Streptomyces mashuensis</i>                     | WP_190132754.1 | WP_190132755.1 |
| <i>Streptomyces longispororuber</i>                | WP_229925817.1 | WP_190137760.1 |
| <i>Streptomyces glebosus</i> strain=JCM            | WP_190145416.1 | WP_190145417.1 |
| <i>Streptomyces humidus</i>                        | WP_190150401.1 | WP_190150402.1 |
| <i>Streptomyces humidus</i>                        | WP_190151593.1 | WP_190151594.1 |
| <i>Streptomyces litmocidini</i>                    | WP_190155458.1 | WP_190155459.1 |
| <i>Streptomyces litmocidini</i>                    | WP_190156082.1 | WP_190156081.1 |
| <i>Streptomyces malachitofuscus</i>                | WP_190163427.1 | WP_190163428.1 |
| <i>Streptomyces</i> sp. GbtCB7                     | WP_075030274.1 | WP_190168369.1 |
| <i>Streptomyces mirabilis</i>                      | WP_054237210.1 | WP_190172717.1 |
| <i>Streptomyces naganishii</i>                     | WP_190179175.1 | WP_190179176.1 |
| <i>Streptomyces naganishii</i>                     | WP_190180280.1 | WP_190180281.1 |
| <i>Streptomyces cirratus</i>                       | WP_190183746.1 | WP_190183745.1 |
| <i>Streptomyces cirratus</i>                       | WP_190187510.1 | WP_190187509.1 |
| <i>Streptomyces cirratus</i>                       | WP_190187956.1 | WP_190187955.1 |
| <i>Streptomyces minutiscleroticus</i>              | WP_190191453.1 | WP_190191454.1 |
| <i>Streptomyces minutiscleroticus</i>              | WP_190192413.1 | WP_190192412.1 |
| <i>Streptomyces djakartensis</i>                   | WP_190201412.1 | WP_190201411.1 |
| <i>Streptomyces fumanus</i>                        | WP_190203802.1 | WP_190203803.1 |
| <i>Streptomyces fumanus</i>                        | WP_190205132.1 | WP_190205133.1 |
| <i>Kitasatospora indigofera</i>                    | WP_190210743.1 | WP_190210742.1 |
| <i>Kitasatospora indigofera</i>                    | WP_190211397.1 | WP_190211398.1 |
| <i>Streptomyces griseosporus</i>                   | WP_190219636.1 | WP_190219635.1 |
| <i>Streptomyces hydrogenans</i>                    | WP_190221253.1 | WP_190221254.1 |
| <i>Streptomyces hydrogenans</i>                    | WP_190222604.1 | WP_190222605.1 |
| <i>Streptomyces umbrinus</i>                       | WP_190228130.1 | WP_190228131.1 |
| <i>Actinomadura</i> sp. RB99                       | WP_190855136.1 | WP_190855134.1 |
| <i>Actinomadura</i> sp. RB99                       | WP_190855302.1 | WP_190855305.1 |
| <i>Streptomyces tuius</i>                          | WP_190896066.1 | WP_190896064.1 |
| <i>Streptomyces tuius</i>                          | WP_190901339.1 | WP_190901341.1 |
| <i>Streptomyces chumphonensis</i>                  | WP_191208330.1 | WP_191208331.1 |
| <i>Streptomyces chumphonensis</i>                  | WP_191210716.1 | WP_191210715.1 |
| <i>Amycolatopsis deserti</i>                       | WP_191248052.1 | WP_191248053.1 |
| <i>Amycolatopsis oliviviridis</i>                  | WP_191252000.1 | WP_191252002.1 |
| <i>Kitasatospora herbaricolor</i>                  | WP_191290025.1 | WP_191290024.1 |
| <i>Kitasatospora herbaricolor</i>                  | WP_073927034.1 | WP_191290777.1 |
| <i>Lentzea cavernae</i>                            | WP_191303146.1 | WP_191303147.1 |
| <i>Actinomadura cremae</i>                         | WP_191333939.1 | WP_191333938.1 |
| <i>Catellatospora chokoriensis</i> strain=NBRC     | WP_191842194.1 | WP_191842193.1 |
| <i>Streptomyces filipinensis</i>                   | WP_191871239.1 | WP_191871240.1 |
| <i>Streptomyces filipinensis</i>                   | WP_191873372.1 | WP_191873374.1 |
| <i>Streptomyces mutabilis</i> strain=JCM           | WP_191888997.1 | WP_191888996.1 |
| <i>Streptomyces mutabilis</i> strain=JCM           | WP_191888999.1 | WP_191888998.1 |
| <i>Streptomyces</i> sp. H28                        | WP_192232401.1 | WP_192232402.1 |
| <i>Streptomyces</i> sp. VITNK9                     | WP_225620030.1 | WP_192342467.1 |
| <i>Nonomurea africana</i>                          | WP_192776711.1 | WP_192776710.1 |
| <i>Streptomyces</i> sp. RT42                       | WP_210953043.1 | WP_193448643.1 |
| <i>Streptomyces plicatus</i>                       | WP_192342468.1 | WP_193450422.1 |
| <i>Streptomyces griseus</i> strain=JCM             | WP_193463781.1 | WP_193463780.1 |
| <i>Streptomyces janthinus</i>                      | WP_193483055.1 | WP_193483054.1 |
| <i>Streptomyces bellus</i>                         | WP_193502879.1 | WP_193502881.1 |
| <i>Streptomyces vinaceusdrappus</i>                | WP_193517012.1 | WP_193517011.1 |
| <i>Thermobifida fusca</i> strain=UPMC              | WP_193587122.1 | WP_193587123.1 |
| <i>Streptomyces ferrugineus</i>                    | WP_194040477.1 | WP_194040475.1 |
| <i>Streptomyces ferrugineus</i>                    | WP_194040914.1 | WP_194040912.1 |
| <i>Streptomyces olivaceus</i> strain=SCSIO         | WP_194275976.1 | WP_194275977.1 |
| <i>Nocardia</i> sp. BSTN01                         | WP_194807359.1 | WP_194807358.1 |
| <i>Nocardia</i> sp. XZ                             | WP_228542277.1 | WP_194837650.1 |
| <i>Catenulispora rubra</i>                         | WP_194915535.1 | WP_194915519.1 |
| <i>Nocardia abscessus</i> strain=N-11              | WP_195036287.1 | WP_195036288.1 |
| <i>Nocardia beijingensis</i> strain=N-39           | WP_195046753.1 | WP_195046752.1 |
| <i>Nocardia nova</i> strain=N-46                   | WP_195076427.1 | WP_195076426.1 |
| <i>Nocardia beijingensis</i> strain=BJ06-0111      | WP_195086578.1 | WP_195086580.1 |
| <i>Nocardia brasiliensis</i> strain=BJ06-0105      | WP_267467182.1 | WP_195089550.1 |
| <i>Nocardia abscessus</i> strain=N-20              | WP_195105081.1 | WP_195105079.1 |
| <i>Nocardia transvalensis</i> strain=BJ06-0148     | WP_195108043.1 | WP_195108042.1 |
| <i>Nocardia terpenica</i> strain=N-34              | WP_195119381.1 | WP_195119382.1 |
| <i>Nocardia abscessus</i> strain=BJ06-0146         | WP_195148739.1 | WP_195148740.1 |
| <i>Nocardia abscessus</i> strain=BJ06-0146         | WP_195154344.1 | WP_195154343.1 |
| <i>Streptomyces olivaceus</i>                      | WP_194275976.1 | WP_195888925.1 |
| <i>Nonomurea cyprica</i>                           | WP_195899822.1 | WP_195899821.1 |
| <i>Streptomyces spinoverrucosus</i> strain=SNB-032 | WP_196463314.1 | WP_196463315.1 |
| <i>Micromonospora vinacea</i>                      | WP_196920884.1 | WP_196920883.1 |

|                                                |                |                |
|------------------------------------------------|----------------|----------------|
| Kitasatospora sp. SUK                          | WP_196952144.1 | WP_196952154.1 |
| Longispora fulva strain=NBRC                   | WP_233473195.1 | WP_197001614.1 |
| Priestia endophytica strain=G25-135-1          | WP_082802560.1 | WP_197233005.1 |
| Saccharomonospora sp. NB11                     | WP_197319853.1 | WP_197319852.1 |
| Streptomyces bathyalis                         | WP_197352721.1 | WP_197352722.1 |
| Streptomyces sp. HB-N217                       | WP_197923607.1 | WP_197923606.1 |
| Streptomyces sp. HB-N217                       | WP_197925604.1 | WP_197925606.1 |
| Streptomyces javensis                          | WP_198276558.1 | WP_198276557.1 |
| Acidithiobacillus ferrivorans strain=XJFY6S-08 | WP_198661325.1 | WP_198661326.1 |
| Frankia sp. CcI49                              | WP_054567319.1 | WP_198955648.1 |
| Streptomyces sp. BSE7-9                        | WP_163041661.1 | WP_199214250.1 |
| Pseudosporangium sp. NEAU-24                   | WP_199510914.1 | WP_199510915.1 |
| Streptomyces murinus strain=Am1                | WP_128790635.1 | WP_199573978.1 |
| Streptomyces sp. CRB46                         | WP_019326887.1 | WP_199578747.1 |
| Streptomyces sp. CRB46                         | WP_233535641.1 | WP_199579154.1 |
| Streptomyces sp. DSM                           | WP_199586748.1 | WP_199586749.1 |
| Micromonospora sp. Llam0                       | WP_123603557.1 | WP_199757896.1 |
| Nocardiosis alba                               | WP_017533710.1 | WP_199806175.1 |
| Streptomyces sp. NBRC                          | WP_055549146.1 | WP_199830915.1 |
| Streptomyces badius                            | WP_069739084.1 | WP_199887784.1 |
| Streptomyces sp. HSG2                          | WP_200262965.1 | WP_200262964.1 |
| Streptomyces sp. Y2F8-2                        | WP_200420980.1 | WP_200420979.1 |
| Streptomyces sp. Y2F8-2                        | WP_200422177.1 | WP_200422178.1 |
| Streptomyces sp. NE5-10                        | WP_200425293.1 | WP_200425294.1 |
| Streptomyces sp. NE5-10                        | WP_200426147.1 | WP_200426146.1 |
| Streptomyces sp. MBT51                         | WP_267950907.1 | WP_200693555.1 |
| Streptomyces sp. MBT51                         | WP_200695186.1 | WP_200695187.1 |
| Streptomyces sp. MBT51                         | WP_200696429.1 | WP_200696428.1 |
| Streptomyces sp. MBT33                         | WP_200702698.1 | WP_200702697.1 |
| Streptomyces sp. MBT49                         | WP_189928680.1 | WP_200727318.1 |
| Streptomyces sp. MBT60                         | WP_030720920.1 | WP_200739372.1 |
| Streptomyces sp. MBT97                         | WP_189928680.1 | WP_200745744.1 |
| Frankia sp. R43                                | WP_054567319.1 | WP_200931336.1 |
| Ktedonobacter sp. SOSP1-52                     | WP_201377852.1 | WP_201377850.1 |
| Ktedonobacter sp. SOSP1-85                     | WP_201380479.1 | WP_201380481.1 |
| Ktedonobacter sp. SOSP1-52                     | WP_201384623.1 | WP_201384621.1 |
| Ktedonobacter sp. SOSP1-52                     | WP_201386405.1 | WP_201386407.1 |
| Ktedonobacter sp. SOSP1-52                     | WP_201392524.1 | WP_201392522.1 |
| Ktedonobacter sp. SOSP1-85                     | WP_201392968.1 | WP_201392970.1 |
| Streptacidiphilus melanogenes                  | WP_042388956.1 | WP_201776269.1 |
| Streptacidiphilus anmyonensis                  | WP_042428675.1 | WP_201776891.1 |
| Streptacidiphilus neutrinimicus                | WP_042371786.1 | WP_201777160.1 |
| Streptomyces musisoli strain=CH5-8             | WP_201817767.1 | WP_201817769.1 |
| Streptomyces musisoli strain=CH5-8             | WP_201820075.1 | WP_201820078.1 |
| Streptomyces actinomycinicus                   | WP_201831585.1 | WP_201831586.1 |
| Streptomyces spororaveus                       | WP_202199265.1 | WP_202199264.1 |
| Streptomyces spororaveus                       | WP_202203095.1 | WP_202203096.1 |
| Streptomyces sp. SN-593                        | WP_202232828.1 | WP_202232829.1 |
| Streptomyces sp. SN-593                        | WP_202233832.1 | WP_202233833.1 |
| Streptomyces sp. SN-593                        | WP_202237348.1 | WP_202237347.1 |
| Streptomyces sp. M2CJ-2                        | WP_202274459.1 | WP_202274456.1 |
| Streptomyces sp. M2CJ-2                        | WP_202280850.1 | WP_202280851.1 |
| Nocardiosis alba strain=SID5840                | WP_017533710.1 | WP_202422406.1 |
| Streptomyces sp. SID8356                       | WP_026237417.1 | WP_202439160.1 |
| Streptomyces sp. SID685                        | WP_093681164.1 | WP_202517876.1 |
| Streptomyces sp. SID4937                       | WP_093692501.1 | WP_202540361.1 |
| Streptomyces sp. KY75                          | WP_202591933.1 | WP_202591934.1 |
| Saccharothrix deserti                          | WP_158852616.1 | WP_202919301.1 |
| Streptomyces sp. E5N298                        | WP_238696913.1 | WP_202977695.1 |
| Frankia sp. AgB1.8                             | WP_203019264.1 | WP_203019294.1 |
| Streptomyces pratensis                         | WP_203184316.1 | WP_203184315.1 |
| Nocardia arthritidis strain=AUSMDU00012717     | WP_203217661.1 | WP_203217662.1 |
| Streptomyces rochei strain=SID8161             | WP_164287224.1 | WP_203613417.1 |
| Streptomyces bauhiniiae strain=SID7754         | WP_164189851.1 | WP_203618146.1 |
| Streptomyces fulvissimus strain=SID14438       | WP_203678333.1 | WP_203678332.1 |
| Catellatospora coxensis                        | WP_203688017.1 | WP_203688016.1 |
| Asanoa iriomotensis                            | WP_203702217.1 | WP_203702216.1 |
| Asanoa siamensis                               | WP_203711118.1 | WP_203711117.1 |
| Catellatospora bangladeshensis                 | WP_203741086.1 | WP_203741084.1 |
| Actinoplanes cyaneus                           | WP_203752911.1 | WP_203752908.1 |
| Actinoplanes nipponensis                       | WP_203765383.1 | WP_203765384.1 |
| Actinoplanes rishiriensis                      | WP_203778821.1 | WP_203778822.1 |
| Actinoplanes tereljensis                       | WP_203798235.1 | WP_203798237.1 |
| Actinoplanes ferrugineus                       | WP_203820157.1 | WP_203820158.1 |
| Actinoplanes ferrugineus                       | WP_203822592.1 | WP_203822591.1 |
| Actinoplanes palleronii                        | WP_239164082.1 | WP_203823633.1 |

|                                                     |                |                |
|-----------------------------------------------------|----------------|----------------|
| <i>Actinoplanes humidus</i>                         | WP_203841315.1 | WP_203841314.1 |
| <i>Plantactinospora mayteni</i>                     | WP_203860436.1 | WP_203860437.1 |
| <i>Plantactinospora endophytica</i>                 | WP_203869697.1 | WP_203869678.1 |
| <i>Plantactinospora endophytica</i>                 | WP_203870421.1 | WP_203870422.1 |
| <i>Rhizocola hellebori</i>                          | WP_203911378.1 | WP_203911437.1 |
| <i>Rhizocola hellebori</i>                          | WP_203913299.1 | WP_203913332.1 |
| <i>Rugosimonospora africana</i>                     | WP_203922087.1 | WP_203922086.1 |
| <i>Virgisporangium ochraceum</i>                    | WP_203930584.1 | WP_203930585.1 |
| <i>Sphaerisporangium rufum</i>                      | WP_239137574.1 | WP_203988362.1 |
| <i>Sphaerisporangium rufum</i>                      | WP_203992522.1 | WP_203992520.1 |
| <i>Micromonospora lutea</i>                         | WP_203994727.1 | WP_203994729.1 |
| <i>Virgisporangium aurantiacum</i>                  | WP_204004633.1 | WP_204004630.1 |
| <i>Micromonospora andamanensis</i>                  | WP_204006452.1 | WP_204006454.1 |
| <i>Micromonospora trujilloniae</i> strain=NBRC      | WP_204024356.1 | WP_204024358.1 |
| <i>Sinosporangium siamense</i>                      | WP_204030131.1 | WP_204030129.1 |
| <i>Micromonospora quiuae</i>                        | WP_204032134.1 | WP_204032132.1 |
| <i>Archangium violaceum</i> strain=SDU8             | WP_204225859.1 | WP_204225858.1 |
| <i>Geodermatophilus normandii</i> strain=I12A-02606 | WP_163477630.1 | WP_204264301.1 |
| <i>Actinoplanes capillaceus</i>                     | WP_204295079.1 | WP_204295078.1 |
| <i>Lentzea nigeriaca</i>                            | WP_204765550.1 | WP_204765549.1 |
| <i>Saccharothrix algeriensis</i>                    | WP_239564863.1 | WP_204845138.1 |
| <i>Streptomyces</i> sp. HB132                       | WP_205020602.1 | WP_205020601.1 |
| <i>Streptomyces noursei</i>                         | WP_205362605.1 | WP_205362603.1 |
| <i>Streptomyces zhihengii</i>                       | WP_205372997.1 | WP_205372998.1 |
| <i>Streptomyces actuosus</i>                        | WP_205381657.1 | WP_205381656.1 |
| <i>Streptomyces actuosus</i>                        | WP_240203985.1 | WP_205384241.1 |
| <i>Planosporangium thailandense</i>                 | WP_167924788.1 | WP_205862534.1 |
| <i>Streptomyces verrucosiporus</i>                  | WP_241028417.1 | WP_206350093.1 |
| <i>Streptomyces verrucosiporus</i>                  | WP_241028713.1 | WP_206351581.1 |
| <i>Streptomyces chrestomyceticus</i> strain=TBRC    | WP_206504812.1 | WP_206504811.1 |
| <i>Streptomyces</i> sp. M54                         | WP_206977200.1 | WP_206977201.1 |
| <i>Lentzea alba</i>                                 | WP_166050646.1 | WP_207311869.1 |
| <i>Streptomyces laculatispora</i>                   | WP_207315323.1 | WP_207315322.1 |
| <i>Streptomyces laculatispora</i>                   | WP_207316276.1 | WP_207316277.1 |
| <i>Streptomyces</i> sp. CA-256286                   | WP_031121791.1 | WP_207563809.1 |
| <i>Streptomyces cyanogenus</i>                      | WP_208031855.1 | WP_208031854.1 |
| <i>Streptomyces cyanogenus</i>                      | WP_208034992.1 | WP_208034993.1 |
| <i>Actinomadura barringtoniae</i>                   | WP_208253202.1 | WP_208253201.1 |
| <i>Actinomadura nitritigenes</i>                    | WP_208265927.1 | WP_208265926.1 |
| <i>Actinomadura nitritigenes</i>                    | WP_208265995.1 | WP_208265994.1 |
| <i>Amycolatopsis niigatensis</i>                    | WP_101437503.1 | WP_208637408.1 |
| <i>Streptomyces griseorubiginosus</i> strain=MPMI3  | WP_133049346.1 | WP_208776932.1 |
| <i>Streptomyces griseorubiginosus</i> strain=MPMI3  | WP_244374093.1 | WP_208783061.1 |
| <i>Streptomyces armeniacus</i>                      | WP_208876819.1 | WP_208876818.1 |
| <i>Streptomyces</i> sp. PBH53                       | WP_208881154.1 | WP_208881157.1 |
| <i>Streptomyces</i> sp. PBH53                       | WP_208886559.1 | WP_208886560.1 |
| <i>Streptomyces incarnatus</i>                      | WP_208899765.1 | WP_208899764.1 |
| <i>Streptomyces clavifer</i>                        | WP_124283265.1 | WP_209471153.1 |
| <i>Kibdelosporangium banguiense</i>                 | WP_245379668.1 | WP_209639100.1 |
| <i>Amycolatopsis magusensis</i>                     | WP_209667539.1 | WP_209667538.1 |
| <i>Paenibacillus silagei</i>                        | WP_245368600.1 | WP_209878734.1 |
| <i>Micromonospora</i> sp. HB375                     | WP_240925589.1 | WP_209962129.1 |
| <i>Streptomyces</i> sp. LBUM                        | WP_041669430.1 | WP_210524937.1 |
| <i>Streptomyces</i> sp. GESEQ-4                     | WP_210574359.1 | WP_210574357.1 |
| <i>Streptomyces</i> sp. GESEQ-35                    | WP_210589296.1 | WP_210589297.1 |
| <i>Streptomyces</i> sp. GESEQ-13                    | WP_137208598.1 | WP_210637880.1 |
| <i>Micromonospora</i> sp. H61                       | WP_210781783.1 | WP_210781782.1 |
| <i>Nocardiosis</i> sp. B62                          | WP_210840936.1 | WP_210840935.1 |
| <i>Micromonospora</i> sp. C97                       | WP_210866528.1 | WP_210866527.1 |
| <i>Streptomyces</i> sp. RG38                        | WP_210873305.1 | WP_210873307.1 |
| <i>Micromonospora</i> sp. C41                       | WP_240925589.1 | WP_210886158.1 |
| <i>Streptomyces</i> sp. RM99                        | WP_166625242.1 | WP_210901399.1 |
| <i>Streptomyces</i> sp. RM99                        | WP_247693706.1 | WP_210903167.1 |
| <i>Streptomyces</i> sp. C3-3                        | WP_210991070.1 | WP_210931108.1 |
| <i>Streptomyces</i> sp. RT42                        | WP_247707245.1 | WP_210952314.1 |
| <i>Streptomyces</i> sp. RT42                        | WP_166625242.1 | WP_210953482.1 |
| <i>Streptomyces</i> sp. b94                         | WP_210960470.1 | WP_210960471.1 |
| <i>Streptomyces</i> sp. b94                         | WP_210961588.1 | WP_210961589.1 |
| <i>Streptomyces</i> sp. RM72                        | WP_210974683.1 | WP_210974684.1 |
| <i>Streptomyces</i> sp. RK62                        | WP_055624995.1 | WP_210979013.1 |
| <i>Streptomyces</i> sp. RK62                        | WP_055624624.1 | WP_210982876.1 |
| <i>Streptomyces sparsogenes</i> DSM                 | WP_076972143.1 | WP_211301899.1 |
| <i>Allorhizocola rhizosphaerae</i>                  | WP_117210696.1 | WP_211588689.1 |
| <i>Paenibacillus tritici</i> strain=PH55-1          | WP_211722356.1 | WP_211722357.1 |
| <i>Kutzneria</i> sp. CA-103260                      | WP_211763380.1 | WP_211763381.1 |
| <i>Kutzneria</i> sp. CA-103260                      | WP_211772286.1 | WP_211768115.1 |

|                                               |                |                |
|-----------------------------------------------|----------------|----------------|
| <i>Streptomyces cangkringensis</i> strain=DSM | WP_211831741.1 | WP_211831742.1 |
| <i>Nocardopsis</i> sp. HDS12                  | WP_212642561.1 | WP_212642562.1 |
| <i>Streptomyces</i> sp. A2-16                 | WP_123992295.1 | WP_212670181.1 |
| <i>Streptomyces</i> sp. A2-16                 | WP_212670634.1 | WP_212670635.1 |
| <i>Streptomyces</i> sp. A2-16                 | WP_123989073.1 | WP_212672547.1 |
| <i>Streptomyces</i> sp. V17-9                 | WP_125628858.1 | WP_212731175.1 |
| <i>Flexivirga aerilata</i>                    | WP_171155320.1 | WP_212755552.1 |
| <i>Catellatospora</i> sp. TT07R-123           | WP_212826293.1 | WP_212826295.1 |
| <i>Actinoplanes consettensis</i> strain=NBRC  | WP_203841315.1 | WP_212996103.1 |
| <i>Actinoplanes toevensis</i> strain=NBRC     | WP_213008462.1 | WP_213008502.1 |
| <i>Streptomyces tauricus</i>                  | WP_189777333.1 | WP_213089758.1 |
| <i>Nocardia tengchongensis</i> strain=CFH     | WP_213561277.1 | WP_213556495.1 |
| <i>Photorhabdus noenieputensis</i> strain=DSM | WP_214088982.1 | WP_214088983.1 |
| <i>Streptomyces</i> sp. Tu102                 | WP_125525194.1 | WP_214329455.1 |
| <i>Sphaerisporangium</i> sp. H8589            | WP_214410572.1 | WP_214410571.1 |
| <i>Actinomadura</i> sp. NEAU-AAG7             | WP_214615635.1 | WP_214615634.1 |
| <i>Actinomadura</i> sp. NEAU-AAG7             | WP_242884365.1 | WP_214617098.1 |
| <i>Rhodococcus cavernicola</i> strain=C1-24   | WP_149431539.1 | WP_214633113.1 |
| <i>Streptomyces</i> sp. ISL-98                | WP_251020751.1 | WP_214921466.1 |
| <i>Streptomyces</i> sp. ISL-98                | WP_214928709.1 | WP_214928710.1 |
| <i>Streptomyces</i> sp. ISL-21                | WP_251049483.1 | WP_214934828.1 |
| <i>Streptomyces</i> sp. ISL-21                | WP_251059585.1 | WP_214934901.1 |
| <i>Streptomyces</i> sp. ISL-100               | WP_214979302.1 | WP_214979304.1 |
| <i>Streptomyces</i> sp. ISL-86                | WP_251049479.1 | WP_215059738.1 |
| <i>Streptomyces</i> sp. ISL-1                 | WP_251016902.1 | WP_215089493.1 |
| <i>Streptomyces</i> sp. MG62                  | WP_215119854.1 | WP_215119853.1 |
| <i>Streptomyces</i> sp. ISL-96                | WP_215137370.1 | WP_215137372.1 |
| <i>Streptomyces</i> sp. ISL-44                | WP_215143758.1 | WP_215143759.1 |
| <i>Streptomyces</i> sp. ISL-10                | WP_251022450.1 | WP_215179710.1 |
| <i>Streptomyces</i> sp. ISL-10                | WP_215185118.1 | WP_215185116.1 |
| <i>Streptomyces</i> sp. CHD11                 | WP_215206625.1 | WP_215206626.1 |
| <i>Streptomyces</i> sp. CHD11                 | WP_215209206.1 | WP_215209205.1 |
| <i>Streptomyces</i> sp. Vc74B-19              | WP_251696773.1 | WP_215213122.1 |
| <i>Streptomyces</i> sp. Vc74B-19              | WP_215214082.1 | WP_215214081.1 |
| <i>Streptomyces</i> sp. ATCC                  | WP_215447764.1 | WP_215447762.1 |
| <i>Streptomyces</i> sp. ATCC                  | WP_251830168.1 | WP_215453145.1 |
| <i>Streptomyces</i> sp. ATCC                  | WP_215453114.1 | WP_215457558.1 |
| <i>Zooshikella</i> sp. WH53                   | WP_215821719.1 | WP_215821720.1 |
| <i>Streptomyces</i> sp. YPW6                  | WP_216321350.1 | WP_216321348.1 |
| <i>Streptomyces</i> sp. 4503                  | WP_216346585.1 | WP_216346584.1 |
| <i>Streptomyces</i> sp. A108                  | WP_216721109.1 | WP_216721110.1 |
| <i>Streptomyces</i> sp. A108                  | WP_216722463.1 | WP_216722462.1 |
| <i>Streptomyces</i> sp. Osf17                 | WP_247707245.1 | WP_216880456.1 |
| <i>Streptomyces</i> sp. AC558                 | WP_217131386.1 | WP_217131387.1 |
| <i>Streptomyces</i> sp. AC627                 | WP_217139871.1 | WP_217139872.1 |
| <i>Streptomyces</i> sp. AC627                 | WP_217141879.1 | WP_217141880.1 |
| <i>Streptomyces</i> sp. AC512                 | WP_254394305.1 | WP_217161459.1 |
| <i>Streptomyces</i> sp. AC512                 | WP_217167666.1 | WP_217167665.1 |
| <i>Streptomyces</i> sp. AC495                 | WP_251830168.1 | WP_217177573.1 |
| <i>Streptomyces</i> sp. AC495                 | WP_215447764.1 | WP_217180098.1 |
| <i>Streptomyces</i> sp. AC550                 | WP_217210288.1 | WP_217210293.1 |
| <i>Streptomyces</i> sp. AC555                 | WP_217235990.1 | WP_217235991.1 |
| <i>Streptomyces</i> sp. AC555                 | WP_217237543.1 | WP_217237542.1 |
| <i>Streptomyces</i> sp. AC602                 | WP_217245372.1 | WP_217245371.1 |
| <i>Streptomyces</i> sp. AC602                 | WP_217254557.1 | WP_217254558.1 |
| <i>Streptomyces</i> sp. GMY02                 | WP_217307784.1 | WP_217307785.1 |
| <i>Streptomyces</i> sp. NK08203               | WP_217383493.1 | WP_217383494.1 |
| <i>Streptomyces</i> sp. BV286                 | WP_217453116.1 | WP_217453117.1 |
| <i>Streptomyces</i> sp. BV129                 | WP_217461390.1 | WP_217461389.1 |
| <i>Streptomyces</i> sp. GbtcB6                | WP_254647076.1 | WP_217549288.1 |
| <i>Streptomyces</i> sp. GbtcB7                | WP_211179941.1 | WP_217575481.1 |
| <i>Streptomyces</i> sp. CAI-85                | WP_175519452.1 | WP_217686546.1 |

---
