# Supplementary material for: A deep learning model for type II polyketide natural product prediction without sequence alignment
Source: Royal Society of Chemistry journal article supplement (doi:10.1039/d3dd00107e), 2023-01-01
Supplement: d3dd00107e4.pdf [file d3dd00107e4.pdf]

**Table S4.** Details of class label assignments at each iterative optimization and data splitting

| T2PK products name    | Initial class label | Class label A | Class label B | Class label C | Class label D | Class label E | Class label F | Final class label | Dataset splitting |                |
|-----------------------|---------------------|---------------|---------------|---------------|---------------|---------------|---------------|-------------------|-------------------|----------------|
|                       |                     |               |               |               |               |               |               |                   | 5 class labels    | 9 class labels |
| A-74528-Hex           | 13                  | II            | IV            | V             | VI            | VII           | VIII          | IX                | train             | train          |
| Abx                   | 13                  | II            | IV            | V             | VI            | VII           | VIII          | IX                | test              | test           |
| +ABXA-BE-24566B       | 13                  | II            | IV            | V             | VI            | VII           | VIII          | IX                | train             | train          |
| Accramycin            | 13                  | II            | IV            | V             | VI            | VII           | VIII          | IX                | test              | test           |
| Aclacinomycin-Pr      | 10                  | III           | III           | III           | III           | III           | III           | VI                | test              | test           |
| Aclacinomycin-Pr      | 10                  | III           | III           | III           | III           | III           | IV            | VI                | train             | train          |
| Actinorhodin          | 8                   | I             | I             | I             | I             | I             | I             | I                 | test              | test           |
| Alloclonine           | 10                  | III           | III           | IV            | IV            | V             | VI            | VII               | train             | train          |
| Alnumycin-Bu          | 8                   | I             | I             | I             | I             | I             | I             | I                 | train             | train          |
| Anthrabenzoquinone    | 13                  | II            | IV            | V             | VI            | VII           | VIII          | IX                | train             | train          |
| AQ-256                | 8                   | II            | IV            | V             | VI            | VII           | VIII          | IX                | train             | train          |
| Aranciamycin          | 10                  | III           | III           | III           | III           | III           | IV            | VI                | train             | train          |
| Arenimycin            | 12                  | II            | IV            | V             | VI            | VII           | VIII          | IX                | test              | test           |
| Arenimycin'           | 12                  | II            | IV            | V             | VI            | VII           | VIII          | IX                | train             | train          |
| Arimetamycin          | 10                  | III           | III           | III           | III           | III           | IV            | VI                | train             | train          |
| Arixanthomycin        | 13                  | II            | IV            | V             | VI            | VII           | VIII          | IX                | train             | train          |
| Auricin               | 10                  | III           | III           | IV            | IV            | V             | VI            | VII               | train             | train          |
| Azceemicin-aziridine  | 10                  | III           | III           | IV            | IV            | V             | III           | IV                | train             | train          |
| Azceemicin-aziridine  | 10                  | III           | III           | IV            | IV            | V             | III           | IV                | train             | train          |
| Baikalomycin          | 10                  | III           | III           | III           | III           | III           | IV            | VI                | train             | train          |
| BE-7585A              | 10                  | III           | IV            | V             | VI            | VII           | VIII          | IX                | train             | train          |
| Benastatin-Hex        | 12                  | II            | III           | IV            | IV            | IV            | V             | VI                | train             | train          |
| Bipentamycin          | 10                  | III           | III           | IV            | IV            | V             | III           | IV                | test              | test           |
| Brasiliquinone-Pr     | 10                  | III           | III           | IV            | IV            | V             | III           | IV                | test              | test           |
| Calixanthomycin       | 12                  | III           | IV            | V             | VI            | VII           | VIII          | IX                | train             | train          |
| Cervimycin-malonoamyl | 9                   | II            | IV            | V             | VI            | VII           | VIII          | IX                | train             | train          |
| Chartreusin           | 10                  | III           | III           | III           | III           | III           | IV            | VI                | test              | test           |
| Chartreusin'          | 10                  | III           | III           | III           | III           | III           | IV            | VI                | train             | train          |
| Chartreusin'          | 10                  | III           | III           | IV            | IV            | V             | III           | IV                | train             | train          |
| Chattamycin           | 10                  | III           | III           | III           | III           | III           | IV            | V                 | train             | train          |
| Chelocardin           | 10                  | III           | III           | III           | III           | III           | IV            | VI                | train             | train          |
| Chlortetracycline     | 10                  | III           | III           | III           | III           | III           | IV            | VI                | train             | train          |
| Chromomycin           | 10                  | III           | III           | III           | III           | III           | IV            | VI                | train             | train          |
| Chrysomycin-Pr        | 10                  | III           | III           | III           | III           | III           | IV            | VI                | train             | train          |
| Cinerubin-Pr          | 10                  | III           | III           | IV            | IV            | IV            | V             | II                | test              | test           |
| Clostrubin            | 10                  | III           | III           | IV            | IV            | IV            | V             | II                | train             | train          |
| Clostrubin'           | 10                  | III           | III           | IV            | IV            | V             | III           | IV                | train             | train          |
| Collinone             | 13                  | III           | IV            | V             | VI            | VII           | VIII          | IX                | train             | train          |
| CosmomycinC-Pr        | 10                  | III           | III           | III           | III           | III           | IV            | V                 | train             | train          |
| Cosmomycin-Pr         | 10                  | III           | III           | III           | III           | III           | IV            | V                 | test              | test           |
| Cur                   | 12                  | III           | IV            | V             | VI            | VII           | VIII          | IX                | test              | test           |
| Cysgriseusin          | 10                  | II            | III           | III           | III           | III           | IV            | VI                | train             | train          |
| Cytorhodin-Pr         | 10                  | III           | III           | III           | III           | III           | IV            | V                 | train             | train          |
| Dactylocycline        | 10                  | III           | III           | III           | III           | III           | IV            | VI                | train             | train          |
| Damnorubcin-Pr        | 10                  | III           | III           | III           | III           | III           | IV            | VI                | train             | train          |
| Dendrubin             | 9                   | III           | IV            | V             | VI            | VII           | VIII          | IX                | test              | test           |
| Doxorubicin-Pr        | 10                  | II            | III           | III           | III           | III           | IV            | VI                | test              | test           |
| Dotomycin             | 10                  | III           | III           | III           | III           | III           | IV            | VI                | train             | train          |
| Elloramycin           | 10                  | III           | III           | III           | III           | III           | IV            | VI                | train             | train          |
| Elloramycin           | 10                  | III           | III           | III           | III           | III           | IV            | VI                | train             | train          |
| Enduracynone          | 13                  | III           | IV            | V             | VI            | VII           | VIII          | IX                | train             | train          |
| Enterocin-Bn          | 8                   | I             | I             | I             | I             | I             | I             | I                 | train             | train          |
| Erdacin               | 8                   | I             | I             | I             | I             | I             | I             | I                 | train             | train          |
| FD-594-Bu             | 13                  | I             | IV            | V             | VI            | VII           | VIII          | IX                | train             | train          |
| Fluostatin            | 10                  | II            | III           | IV            | IV            | V             | III           | IV                | train             | train          |
| FluostatinM           | 10                  | III           | III           | IV            | IV            | V             | III           | IV                | train             | train          |
| FluostatinMQ          | 10                  | III           | III           | IV            | IV            | V             | III           | IV                | train             | train          |
| Fogacin               | 8                   | III           | I             | I             | I             | I             | I             | I                 | test              | test           |
| FogacinC-HCS          | 8                   | I             | I             | I             | I             | I             | I             | I                 | train             | train          |
| Formicamycin          | 13                  | I             | IV            | V             | VI            | VII           | VIII          | IX                | train             | train          |
| Frankiamycin          | 12                  | II            | IV            | V             | V             | VI            | VII           | IX                | train             | train          |
| FredericamycinC       | 13                  | II            | IV            | V             | VI            | VII           | VIII          | IX                | test              | test           |
| Fredericamycin-Hex    | 13                  | II            | IV            | V             | VI            | VII           | VIII          | IX                | train             | train          |
| Frenolicin-Bu         | 8                   | II            | I             | I             | I             | I             | I             | I                 | train             | train          |
| Frigocyclinone        | 10                  | I             | III           | IV            | IV            | V             | VI            | VII               | test              | test           |
| Gaulimycin            | 10                  | III           | III           | IV            | IV            | V             | VI            | VII               | train             | train          |
| Gilvocarcin-Pr        | 10                  | III           | III           | IV            | IV            | IV            | V             | VI                | test              | test           |
| Granaticin            | 8                   | III           | I             | I             | I             | I             | I             | I                 | train             | train          |
| Granaticin'           | 8                   | I             | I             | I             | I             | I             | I             | I                 | train             | train          |
| Granaticin''          | 8                   | I             | I             | I             | I             | I             | I             | I                 | train             | train          |
| Gricamycin            | 10                  | I             | III           | IV            | IV            | V             | III           | IV                | test              | test           |
| Grisorhodin           | 13                  | III           | IV            | V             | VI            | VII           | VIII          | IX                | train             | train          |
| Grisorhodin'          | 13                  | II            | IV            | V             | VI            | VII           | VIII          | IX                | test              | test           |
| Griseusin             | 10                  | II            | III           | III           | III           | III           | IV            | VI                | train             | train          |
| Hatamarubigin         | 10                  | III           | III           | IV            | IV            | V             | VI            | VII               | train             | train          |
| Hedlamycin-Hex        | 10                  | III           | III           | III           | III           | III           | IV            | VI                | train             | train          |
| Heliquinomycin        | 13                  | III           | IV            | V             | VI            | VII           | VIII          | IX                | train             | train          |
| Hexaricin             | 13                  | II            | IV            | V             | VI            | VII           | VIII          | IX                | train             | train          |
| Hiroshidine           | 8                   | II            | I             | I             | I             | I             | I             | I                 | train             | train          |
| Huanglongmycin        | 9                   | I             | II            | II            | II            | II            | II            | III               | train             | train          |
| Hyaluromycin          | 13                  | II            | IV            | V             | VI            | VII           | VIII          | IX                | train             | train          |
| Hydroxyfujiamycin     | 10                  | III           | III           | IV            | IV            | V             | III           | IV                | train             | train          |
| IFOs                  | 8                   | III           | I             | I             | I             | I             | I             | I                 | train             | train          |
| Isatropolone-Bu       | 8                   | I             | I             | I             | I             | I             | I             | I                 | test              | test           |
| Isoindolinomycin-Gly  | 8                   | I             | I             | I             | I             | I             | I             | I                 | train             | train          |
| Jadomycin             | 10                  | I             | III           | IV            | IV            | V             | III           | IV                | train             | train          |
| JBIR-76               | 8                   | III           | I             | I             | I             | I             | I             | I                 | train             | train          |
| Julkchrome            | 9                   | I             | II            | II            | II            | II            | II            | III               | train             | train          |
| Julkchrome'           | 9                   | II            | II            | II            | II            | II            | II            | III               | train             | train          |
| Keycin                | 10                  | II            | III           | III           | III           | III           | IV            | VI                | train             | train          |
| Kiamycin              | 9                   | III           | II            | II            | II            | II            | III           | IV                | train             | train          |
| Kinamycin             | 10                  | II            | III           | IV            | IV            | V             | III           | IV                | train             | train          |
| kinanthraquinone      | 9                   | III           | II            | II            | II            | II            | III           | IV                | test              | test           |
| Komodoquinone         | 10                  | II            | III           | III           | III           | III           | IV            | VI                | test              | test           |
| Komodoquinone'        | 10                  | III           | III           | III           | III           | III           | IV            | VI                | train             | train          |
| Kosinostatin          | 10                  | III           | III           | III           | III           | III           | IV            | VI                | train             | train          |
| Lactonomycin-Gly      | 10                  | III           | III           | III           | III           | III           | IV            | VI                | train             | train          |
| LactonomycinZ-Gly     | 10                  | III           | III           | III           | III           | III           | IV            | VI                | train             | train          |
| Landomycin            | 10                  | III           | III           | IV            | IV            | V             | VI            | VII               | test              | test           |
| LandomycinE           | 10                  | III           | III           | IV            | IV            | V             | VI            | VII               | train             | train          |
| LandomycinE'          | 10                  | III           | III           | IV            | IV            | V             | VI            | VII               | train             | train          |
| LL-D49194etl-Ile      | 10                  | III           | III           | III           | III           | III           | IV            | VI                | train             | train          |
| Lomaiviticin-Pr       | 10                  | III           | III           | III           | III           | III           | IV            | V                 | train             | train          |
| Lomaiviticin'-Pr      | 10                  | III           | III           | III           | III           | III           | IV            | V                 | test              | test           |
| Lomaiviticin''-Pr     | 10                  | III           | III           | III           | III           | III           | IV            | V                 | train             | train          |
| Lugduromycin          | 10                  | III           | III           | IV            | IV            | V             | III           | IV                | train             | train          |
| Lysolipin             | 12                  | III           | IV            | V             | VI            | VII           | VIII          | IX                | test              | test           |
| Maduralactomycin      | 10                  | II            | III           | III           | III           | III           | IV            | VI                | train             | train          |
| Mayamycin             | 10                  | III           | III           | IV            | IV            | V             | III           | IV                | train             | train          |
| Medermycin            | 8                   | III           | I             | I             | I             | I             | I             | I                 | train             | train          |
| Mensacarin            | 10                  | I             | III           | III           | III           | III           | IV            | VI                | test              | test           |
| Metathramycin         | 10                  | III           | III           | IV            | IV            | V             | III           | IV                | train             | train          |
| Methyketangomycin     | 10                  | III           | III           | IV            | IV            | V             | III           | IV                | train             | train          |
| Mithramycin           | 10                  | III           | III           | III           | III           | III           | IV            | VI                | train             | train          |
| Murayaquinone         | 10                  | III           | III           | III           | III           | III           | IV            | VI                | train             | train          |
| Naphthocyclinone      | 8                   | I             | I             | I             | I             | I             | I             | I                 | train             | train          |
| Nenestatin-Pr         | 10                  | III           | III           | III           | III           | III           | IV            | V                 | train             | train          |
| Nivetetracyclate-Pr   | 10                  | III           | III           | III           | III           | III           | IV            | VI                | train             | train          |
| Nocardiopeptin-Pr     | 10                  | III           | III           | IV            | IV            | V             | III           | IV                | train             | train          |
| Nogalamycin           | 10                  | III           | III           | III           | III           | III           | IV            | VI                | train             | train          |

|                    |    |     |     |     |     |     |      |      |       |       |
|--------------------|----|-----|-----|-----|-----|-----|------|------|-------|-------|
| Ovidomycin         | 10 | III | III | IV  | IV  | V   | III  | IV   | train | train |
| Metamycin-iPr      | 9  | I   | IV  | V   | V   | VI  | VII  | II   | test  | test  |
| Oxytetracycline    | 10 | III | III | III | III | III | IV   | VI   | train | train |
| Piloquinone-Leu    | 9  | III | IV  | V   | VI  | VII | VIII | IX   | train | train |
| Paramagnetoquinone | 12 | II  | III | IV  | IV  | V   | VI   | VII  | train | train |
| PD116740           | 10 | III | III | IV  | IV  | V   | III  | IV   | train | train |
| Persiamycin        | 10 | III | III | IV  | IV  | V   | III  | IV   | train | train |
| Poliketomycin      | 10 | III | III | III | III | III | IV   | VI   | test  | test  |
| Pradimicin         | 12 | II  | IV  | V   | VI  | VII | VIII | IX   | train | train |
| Pyxidicycline      | 9  | I   | IV  | V   | V   | VI  | VII  | II   | train | train |
| Qimimycin          | 8  | I   | I   | I   | I   | I   | I    | I    | test  | test  |
| R1128-Leu          | 8  | III | I   | I   | I   | I   | I    | I    | train | train |
| Ravidomycin-Pr     | 10 | III | III | IV  | IV  | V   | III  | IV   | train | train |
| Resistomycin       | 10 | III | III | IV  | IV  | IV  | V    | VI   | train | train |
| Rhodomycin-Pr      | 10 | I   | III | III | III | III | IV   | V    | train | train |
| Rishirilde-Leu     | 9  | I   | I   | I   | I   | I   | I    | I    | train | train |
| Rishirilde-Leu     | 9  | I   | I   | I   | I   | I   | I    | I    | test  | test  |
| Rubrolone-Bu       | 8  | II  | I   | I   | I   | I   | I    | I    | train | train |
| Rubromycin         | 13 | II  | IV  | V   | VI  | VII | VIII | IX   | test  | test  |
| Rubromycin'        | 13 | III | IV  | V   | VI  | VII | VIII | IX   | train | train |
| Saprolmycin        | 10 | III | III | IV  | IV  | V   | III  | IV   | train | train |
| SaaguayamycinA     | 10 | III | III | IV  | IV  | V   | III  | IV   | test  | test  |
| SaaguayamycinZ     | 10 | II  | III | IV  | IV  | V   | III  | IV   | train | train |
| Sch                | 12 | III | IV  | V   | V   | VI  | VII  | VIII | train | train |
| Sch47554           | 10 | II  | III | IV  | IV  | V   | III  | IV   | train | train |
| Setomimycin        | 9  | III | II  | II  | II  | II  | II   | III  | test  | test  |
| SF2575             | 10 | III | III | IV  | IV  | V   | VI   | VII  | train | train |
| Simocyclinone      | 10 | III | III | IV  | IV  | V   | III  | IV   | test  | test  |
| Simocyclinone'     | 10 | III | III | IV  | IV  | V   | III  | IV   | train | train |
| Steffmycin         | 10 | III | III | III | III | III | IV   | VI   | train | train |
| Streptoketide-Pr   | 10 | III | III | III | III | III | IV   | VI   | train | train |
| Tetarimycin        | 10 | III | III | III | III | III | IV   | VI   | train | train |
| Tetracenomylin     | 10 | III | III | III | III | III | IV   | VI   | train | train |
| Thioangucycline    | 10 | II  | III | IV  | IV  | V   | III  | IV   | train | train |
| TLN-05220-Ile      | 13 | III | IV  | V   | VI  | VII | VIII | IX   | train | train |
| Trioxacarcin-Ile   | 10 | II  | III | III | III | III | IV   | VI   | train | train |
| Turbimycin         | 13 | III | IV  | V   | VI  | VII | VIII | IX   | train | train |
| Urdamycin          | 10 | III | III | IV  | IV  | V   | III  | IV   | train | train |
| UT-X26-F129        | 10 | III | III | III | III | III | IV   | VI   | test  | test  |
| Warkmycin          | 10 | II  | III | III | III | III | IV   | VI   | train | train |
| Wexrubicin         | 10 | II  | III | IV  | IV  | IV  | V    | II   | train | train |
| WhE                | 12 | III | IV  | V   | V   | VI  | VII  | VIII | train | train |
| WS79089D           | 13 | II  | IV  | V   | VI  | VII | VIII | IX   | train | train |
| X26                | 10 | II  | III | III | III | III | IV   | VI   | train | train |
| Xantholipin        | 13 | II  | IV  | V   | VI  | VII | VIII | IX   | train | train |
| ZHMpentangular     | 13 | II  | IV  | V   | V   | VI  | VII  | VIII | train | train |
