# Supplementary material for: A deep learning model for type II polyketide natural product prediction without sequence alignment
Source: Royal Society of Chemistry journal article supplement (doi:10.1039/d3dd00107e), 2023-01-01
Supplement: d3dd00107e5.pdf [file d3dd00107e5.pdf]

|                    |       |       |       |       |       |       |       |       |       |       |       |       |       |
|--------------------|-------|-------|-------|-------|-------|-------|-------|-------|-------|-------|-------|-------|-------|
| Frenolicin-Bu      | 0.71  | 0.683 | 0.711 | 0.804 | 0.697 | 0.702 | 0.705 | 0.678 | 0.69  | 0.701 | 0.715 | 0.699 | 0.607 |
| Frigocyclinone     | 0.536 | 0.543 | 0.531 | 0.525 | 0.54  | 0.541 | 0.54  | 0.547 | 0.556 | 0.536 | 0.545 | 0.542 | 0.548 |
| Gauidinycin        | 0.502 | 0.489 | 0.492 | 0.556 | 0.504 | 0.5   | 0.516 | 0.535 | 0.536 | 0.479 | 0.497 | 0.488 | 0.48  |
| Glyocarcin-Pr      | 0.759 | 0.752 | 0.764 | 0.686 | 0.761 | 0.756 | 0.775 | 0.754 | 0.755 | 0.761 | 0.752 | 0.765 | 0.602 |
| Granaticin         | 0.616 | 0.615 | 0.623 | 0.659 | 0.626 | 0.623 | 0.63  | 0.628 | 0.609 | 0.618 | 0.64  | 0.635 | 0.572 |
| Granaticin'        | 0.952 | 0.907 | 0.95  | 0.726 | 0.928 | 0.957 | 0.976 | 0.929 | 0.901 | 0.966 | 0.986 | 0.963 | 0.825 |
| Granaticin"        | 0.612 | 0.616 | 0.617 | 0.622 | 0.624 | 0.623 | 0.622 | 0.622 | 0.639 | 0.617 | 0.62  | 0.644 | 0.63  |
| Grixamycin         | 0.486 | 0.462 | 0.476 | 0.452 | 0.465 | 0.469 | 0.481 | 0.459 | 0.462 | 0.462 | 0.46  | 0.458 | 0.377 |
| Grisorhodin        | 0.675 | 0.718 | 0.694 | 0.745 | 0.7   | 0.707 | 0.689 | 0.731 | 0.706 | 0.704 | 0.741 | 0.724 | 0.625 |
| Actisorhodin       | 0.669 | 0.686 | 0.679 | 0.737 | 0.693 | 0.688 | 0.67  | 0.666 | 0.651 | 0.69  | 0.705 | 0.7   | 0.646 |
| Grisorhodin'       | 0.689 | 0.73  | 0.708 | 0.738 | 0.711 | 0.718 | 0.703 | 0.733 | 0.713 | 0.718 | 0.746 | 0.732 | 0.615 |
| Grisusin           | 0.577 | 0.583 | 0.568 | 0.626 | 0.568 | 0.57  | 0.587 | 0.601 | 0.605 | 0.56  | 0.58  | 0.555 | 0.589 |
| Hatomunbigin       | 0.501 | 0.475 | 0.499 | 0.457 | 0.497 | 0.492 | 0.505 | 0.515 | 0.524 | 0.49  | 0.487 | 0.494 | 0.452 |
| Hedamycin-Hex      | 0.821 | 0.792 | 0.808 | 0.748 | 0.831 | 0.827 | 0.837 | 0.83  | 0.833 | 0.803 | 0.809 | 0.792 | 0.779 |
| Heliquinycin       | 0.653 | 0.681 | 0.66  | 0.713 | 0.677 | 0.676 | 0.675 | 0.688 | 0.683 | 0.675 | 0.697 | 0.687 | 0.589 |
| Heuaricin          | 0.681 | 0.668 | 0.688 | 0.689 | 0.702 | 0.706 | 0.695 | 0.685 | 0.692 | 0.688 | 0.694 | 0.685 | 0.65  |
| Hiroshidine        | 0.691 | 0.675 | 0.699 | 0.696 | 0.706 | 0.705 | 0.688 | 0.661 | 0.642 | 0.71  | 0.713 | 0.706 | 0.637 |
| Huanglongmycin     | 0.663 | 0.646 | 0.671 | 0.571 | 0.658 | 0.66  | 0.669 | 0.631 | 0.64  | 0.655 | 0.655 | 0.657 | 0.426 |
| Hyaluronicin       | 0.705 | 0.71  | 0.709 | 0.699 | 0.706 | 0.702 | 0.722 | 0.698 | 0.71  | 0.705 | 0.718 | 0.709 | 0.545 |
| Hydroxyfujamycin   | 0.467 | 0.455 | 0.462 | 0.495 | 0.462 | 0.466 | 0.469 | 0.481 | 0.494 | 0.447 | 0.466 | 0.453 | 0.388 |
| Alloicyclonone     | 0.643 | 0.655 | 0.65  | 0.723 | 0.648 | 0.653 | 0.643 | 0.631 | 0.636 | 0.652 | 0.663 | 0.665 | 0.607 |
| IPQs               | 0.694 | 0.724 | 0.695 | 0.756 | 0.723 | 0.73  | 0.712 | 0.711 | 0.692 | 0.716 | 0.711 | 0.727 | 0.788 |
| Istropolone-Bu     | 0.722 | 0.706 | 0.675 | 0.67  | 0.676 | 0.704 | 0.692 | 0.68  | 0.697 | 0.646 | 0.704 | 0.684 | 0.645 |
| Isoindolizone-City | 0.604 | 0.597 | 0.61  | 0.614 | 0.629 | 0.622 | 0.619 | 0.627 | 0.617 | 0.614 | 0.616 | 0.63  | 0.462 |
| Jadomycin          | 0.558 | 0.527 | 0.562 | 0.501 | 0.565 | 0.561 | 0.569 | 0.563 | 0.581 | 0.55  | 0.557 | 0.548 | 0.342 |
| JBIR-76            | 0.654 | 0.672 | 0.661 | 0.82  | 0.682 | 0.687 | 0.679 | 0.679 | 0.664 | 0.683 | 0.674 | 0.697 | 0.818 |
| Juichrome          | 0.524 | 0.494 | 0.523 | 0.479 | 0.522 | 0.525 | 0.529 | 0.503 | 0.521 | 0.507 | 0.521 | 0.507 | 0.338 |
| Juichrome'         | 0.576 | 0.557 | 0.57  | 0.562 | 0.564 | 0.566 | 0.567 | 0.538 | 0.558 | 0.56  | 0.565 | 0.562 | 0.389 |
| Keycin             | 0.584 | 0.556 | 0.573 | 0.548 | 0.569 | 0.57  | 0.594 | 0.593 | 0.584 | 0.56  | 0.557 | 0.56  | 0.595 |
| Kiamycin           | 0.561 | 0.548 | 0.565 | 0.55  | 0.578 | 0.573 | 0.569 | 0.595 | 0.57  | 0.561 | 0.572 | 0.565 | 0.453 |
| Kiamycin'          | 0.479 | 0.461 | 0.481 | 0.496 | 0.479 | 0.478 | 0.486 | 0.476 | 0.489 | 0.474 | 0.477 | 0.469 | 0.369 |
| Kiamycin-Bu        | 0.705 | 0.674 | 0.695 | 0.667 | 0.69  | 0.7   | 0.694 | 0.644 | 0.659 | 0.686 | 0.693 | 0.694 | 0.632 |
| kinanthraquinone   | 0.595 | 0.591 | 0.6   | 0.547 | 0.593 | 0.594 | 0.587 | 0.549 | 0.542 | 0.599 | 0.587 | 0.598 | 0.451 |
| Komodoquinone      | 0.591 | 0.603 | 0.604 | 0.666 | 0.609 | 0.607 | 0.604 | 0.61  | 0.589 | 0.617 | 0.625 | 0.621 | 0.632 |
| Komodoquinone'     | 0.56  | 0.572 | 0.583 | 0.669 | 0.585 | 0.58  | 0.577 | 0.58  | 0.559 | 0.59  | 0.595 | 0.599 | 0.566 |
| Kosonstatin        | 0.546 | 0.538 | 0.549 | 0.645 | 0.549 | 0.544 | 0.556 | 0.567 | 0.573 | 0.542 | 0.55  | 0.542 | 0.552 |
| Lactonamycin-Gly   | 0.622 | 0.618 | 0.638 | 0.593 | 0.624 | 0.622 | 0.637 | 0.645 | 0.641 | 0.628 | 0.649 | 0.635 | 0.488 |
| LactonamycinZ-Gly  | 0.581 | 0.569 | 0.587 | 0.508 | 0.575 | 0.576 | 0.581 | 0.573 | 0.571 | 0.57  | 0.578 | 0.58  | 0.422 |
| Landonycin         | 0.517 | 0.516 | 0.506 | 0.549 | 0.532 | 0.533 | 0.53  | 0.573 | 0.571 | 0.508 | 0.516 | 0.516 | 0.556 |
| LandonycinE        | 0.516 | 0.524 | 0.519 | 0.562 | 0.534 | 0.535 | 0.532 | 0.553 | 0.531 | 0.525 | 0.534 | 0.527 | 0.468 |
| LandonycinE'       | 0.492 | 0.501 | 0.49  | 0.563 | 0.509 | 0.503 | 0.516 | 0.543 | 0.54  | 0.491 | 0.502 | 0.494 | 0.477 |
| LL-D49194e1-Ile    | 0.567 | 0.539 | 0.566 | 0.54  | 0.553 | 0.568 | 0.562 | 0.542 | 0.537 | 0.554 | 0.554 | 0.558 | 0.572 |
| Anthrabezoonone    | 0.645 | 0.649 | 0.633 | 0.624 | 0.634 | 0.641 | 0.661 | 0.625 | 0.625 | 0.628 | 0.638 | 0.635 | 0.551 |
| Metamycin-Pr       | 0.767 | 0.774 | 0.766 | 0.767 | 0.784 | 0.778 | 0.785 | 0.795 | 0.784 | 0.77  | 0.758 | 0.765 | 0.725 |
| Ploquinone-Leu     | 0.595 | 0.593 | 0.596 | 0.727 | 0.587 | 0.594 | 0.58  | 0.575 | 0.583 | 0.594 | 0.596 | 0.608 | 0.694 |
